# Supplementary material for: Identification of CDH11 as an ASD Risk Gene by Matched-gene Co-expression Analysis and Mouse Behavioral Studies
Source: Research Square preprint supplement (doi:10.21203/rs.3.rs-90298/v1), 2020-10-14
Supplement: Supplementary file 1 [file 16a5dd8814ee15b2989d0f73.xlsx]

## Sheet: TetraM-2515 GO
Category	Term	Count	%	PValue	Genes	List Total	Pop Hits	Pop Total	Fold Enrichment	Bonferroni	Benjamini	FDR
GOTERM_BP_DIRECT	GO:0006351~transcription, DNA-templated	530	21.8107	4.11147e-78	ENSG00000169946, ENSG00000183779, ENSG00000099381, ENSG00000109118, ENSG00000121417, ENSG00000197951, ENSG00000008441, ENSG00000204524, ENSG00000185219, ENSG00000109111, ENSG00000198914, ENSG00000198911, ENSG00000184939, ENSG00000109787, ENSG00000197857, ENSG00000204060, ENSG00000204366, ENSG00000144026, ENSG00000141456, ENSG00000136367, ENSG00000197013, ENSG00000109381, ENSG00000196597, ENSG0000…	2104	1955	16792	2.16364	1.89169e-74	1.89169e-74	7.75586e-75
GOTERM_BP_DIRECT	GO:0006355~regulation of transcription, DNA-templated	425	17.4897	1.24763e-66	ENSG00000183779, ENSG00000099381, ENSG00000121417, ENSG00000197951, ENSG00000185219, ENSG00000204524, ENSG00000109111, ENSG00000184939, ENSG00000109787, ENSG00000197857, ENSG00000009307, ENSG00000204366, ENSG00000144026, ENSG00000136367, ENSG00000197013, ENSG00000130382, ENSG00000196597, ENSG00000166704, ENSG00000144218, ENSG00000110851, ENSG00000121406, ENSG00000196152, ENSG00000197016, ENSG0000…	2104	1504	16792	2.25527	5.74034e-63	2.87017e-63	2.35352e-63
GOTERM_BP_DIRECT	GO:0007156~homophilic cell adhesion via plasma membrane adhesion molecules	51	2.09877	2.09344e-10	ENSG00000113248, ENSG00000067445, ENSG00000204970, ENSG00000113209, ENSG00000242419, ENSG00000218336, ENSG00000139880, ENSG00000113205, ENSG00000069188, ENSG00000169855, ENSG00000140937, ENSG00000165194, ENSG00000204969, ENSG00000196159, ENSG00000179242, ENSG00000128536, ENSG00000239389, ENSG00000185008, ENSG00000204967, ENSG00000182985, ENSG00000204961, ENSG00000197479, ENSG00000204963, ENSG0000…	2104	158	16792	2.57614	9.63191e-07	3.21064e-07	3.94906e-07
GOTERM_BP_DIRECT	GO:0007411~axon guidance	47	1.93416	2.56715e-08	ENSG00000162068, ENSG00000151150, ENSG00000162490, ENSG00000066735, ENSG00000118263, ENSG00000143434, ENSG00000099617, ENSG00000092964, ENSG00000170340, ENSG00000154928, ENSG00000156687, ENSG00000187122, ENSG00000092969, ENSG00000133216, ENSG00000119508, ENSG00000075223, ENSG00000145934, ENSG00000187323, ENSG00000001617, ENSG00000196405, ENSG00000198910, ENSG00000143590, ENSG00000072832, ENSG0000…	2104	159	16792	2.35916	0.000118107	2.95282e-05	4.84265e-05
GOTERM_BP_DIRECT	GO:0016569~covalent chromatin modification	36	1.48148	1.88754e-07	ENSG00000119042, ENSG00000127616, ENSG00000168556, ENSG00000102974, ENSG00000066117, ENSG00000028310, ENSG00000139613, ENSG00000141027, ENSG00000085224, ENSG00000100888, ENSG00000169925, ENSG00000184402, ENSG00000015171, ENSG00000085185, ENSG00000011258, ENSG00000140382, ENSG00000131845, ENSG00000139372, ENSG00000141582, ENSG00000141867, ENSG00000117713, ENSG00000140320, ENSG00000158636, ENSG0000…	2104	113	16792	2.54262	0.000868082	0.000173677	0.000356065
GOTERM_BP_DIRECT	GO:0016055~Wnt signaling pathway	47	1.93416	4.14022e-06	ENSG00000198728, ENSG00000105229, ENSG00000154310, ENSG00000162490, ENSG00000169118, ENSG00000007047, ENSG00000198873, ENSG00000103126, ENSG00000140332, ENSG00000174804, ENSG00000188064, ENSG00000015133, ENSG00000101266, ENSG00000198730, ENSG00000173273, ENSG00000183762, ENSG00000169862, ENSG00000166025, ENSG00000115266, ENSG00000116141, ENSG00000171016, ENSG00000121210, ENSG00000213923, ENSG0000…	2104	187	16792	2.00592	0.0188689	0.00316983	0.0078098
GOTERM_BP_DIRECT	GO:0000122~negative regulation of transcription from RNA polymerase II promoter	131	5.39095	8.18137e-06	ENSG00000197323, ENSG00000169946, ENSG00000108854, ENSG00000080503, ENSG00000182872, ENSG00000121297, ENSG00000113649, ENSG00000109118, ENSG00000173039, ENSG00000163602, ENSG00000086102, ENSG00000008441, ENSG00000127511, ENSG00000184939, ENSG00000198911, ENSG00000141644, ENSG00000118689, ENSG00000135365, ENSG00000163320, ENSG00000139372, ENSG00000204371, ENSG00000120616, ENSG00000005339, ENSG0000…	2104	720	16792	1.4521	0.036943	0.00536309	0.0154322
GOTERM_BP_DIRECT	GO:0050919~negative chemotaxis	15	0.617284	2.68435e-05	ENSG00000135333, ENSG00000185033, ENSG00000168758, ENSG00000143434, ENSG00000095539, ENSG00000170381, ENSG00000187122, ENSG00000185070, ENSG00000075223, ENSG00000130827, ENSG00000075213, ENSG00000001617, ENSG00000092421, ENSG00000184349, ENSG00000137872	2104	34	16792	3.52102	0.116186	0.01532	0.0506253
GOTERM_BP_DIRECT	GO:0016339~calcium-dependent cell-cell adhesion via plasma membrane cell adhesion molecules	13	0.534979	6.31312e-05	ENSG00000112852, ENSG00000120327, ENSG00000120324, ENSG00000169760, ENSG00000197479, ENSG00000166341, ENSG00000113209, ENSG00000242419, ENSG00000113205, ENSG00000187372, ENSG00000179915, ENSG00000113211, ENSG00000170558	2104	28	16792	3.70546	0.252092	0.0317598	0.119023
GOTERM_BP_DIRECT	GO:0000209~protein polyubiquitination	43	1.76955	7.06542e-05	ENSG00000056586, ENSG00000180233, ENSG00000186187, ENSG00000157450, ENSG00000108854, ENSG00000154359, ENSG00000114423, ENSG00000147133, ENSG00000072609, ENSG00000086758, ENSG00000145860, ENSG00000122257, ENSG00000166233, ENSG00000160753, ENSG00000146414, ENSG00000171791, ENSG00000116514, ENSG00000173273, ENSG00000068878, ENSG00000141279, ENSG00000151692, ENSG00000171621, ENSG00000165338, ENSG0000…	2104	184	16792	1.86512	0.277539	0.0319864	0.133198
GOTERM_BP_DIRECT	GO:0007399~nervous system development	60	2.46914	7.4174e-05	ENSG00000127616, ENSG00000066117, ENSG00000080503, ENSG00000007047, ENSG00000081189, ENSG00000131711, ENSG00000113248, ENSG00000204970, ENSG00000166833, ENSG00000085872, ENSG00000113205, ENSG00000122641, ENSG00000198910, ENSG00000125170, ENSG00000072832, ENSG00000092421, ENSG00000169855, ENSG00000204969, ENSG00000139767, ENSG00000204967, ENSG00000157851, ENSG00000197479, ENSG00000204963, ENSG0000…	2104	287	16792	1.6685	0.289145	0.0305497	0.139829
GOTERM_BP_DIRECT	GO:0006338~chromatin remodeling	25	1.02881	0.000100128	ENSG00000128908, ENSG00000119042, ENSG00000127616, ENSG00000173011, ENSG00000136997, ENSG00000162601, ENSG00000066117, ENSG00000080503, ENSG00000139613, ENSG00000085224, ENSG00000125482, ENSG00000109111, ENSG00000196235, ENSG00000184428, ENSG00000113812, ENSG00000141867, ENSG00000117713, ENSG00000048649, ENSG00000142599, ENSG00000163939, ENSG00000049618, ENSG00000163104, ENSG00000198900, ENSG0000…	2104	86	16792	2.32005	0.369167	0.0376652	0.188713
GOTERM_BP_DIRECT	GO:0007416~synapse assembly	20	0.823045	0.000105862	ENSG00000112852, ENSG00000120327, ENSG00000152767, ENSG00000171587, ENSG00000120324, ENSG00000169057, ENSG00000169760, ENSG00000146555, ENSG00000154764, ENSG00000150471, ENSG00000197479, ENSG00000039068, ENSG00000169992, ENSG00000113209, ENSG00000196338, ENSG00000113205, ENSG00000187372, ENSG00000069188, ENSG00000179915, ENSG00000113211	2104	61	16792	2.61672	0.385593	0.0367758	0.199509
GOTERM_BP_DIRECT	GO:0045892~negative regulation of transcription, DNA-templated	92	3.78601	0.000126995	ENSG00000146587, ENSG00000100105, ENSG00000197323, ENSG00000032219, ENSG00000127616, ENSG00000126012, ENSG00000169946, ENSG00000108854, ENSG00000183779, ENSG00000080503, ENSG00000189298, ENSG00000121297, ENSG00000109118, ENSG00000196724, ENSG00000173039, ENSG00000198373, ENSG00000112977, ENSG00000078699, ENSG00000140464, ENSG00000123411, ENSG00000198914, ENSG00000141644, ENSG00000144161, ENSG0000…	2104	499	16792	1.47144	0.442526	0.0408795	0.239291
GOTERM_BP_DIRECT	GO:0006357~regulation of transcription from RNA polymerase II promoter	83	3.41564	0.000141195	ENSG00000032219, ENSG00000127616, ENSG00000066117, ENSG00000080503, ENSG00000118263, ENSG00000011007, ENSG00000121297, ENSG00000177732, ENSG00000154957, ENSG00000125482, ENSG00000135999, ENSG00000196235, ENSG00000137776, ENSG00000118689, ENSG00000122641, ENSG00000188786, ENSG00000160633, ENSG00000135164, ENSG00000198815, ENSG00000204060, ENSG00000181827, ENSG00000198146, ENSG00000109381, ENSG0000…	2104	441	16792	1.50209	0.477789	0.0423876	0.266014
GOTERM_BP_DIRECT	GO:0010793~regulation of mRNA export from nucleus	6	0.246914	0.000164916	ENSG00000011243, ENSG00000109111, ENSG00000047410, ENSG00000181555, ENSG00000014164, ENSG00000163166	2104	6	16792	7.98099	0.531792	0.0463206	0.31064
GOTERM_BP_DIRECT	GO:2000171~negative regulation of dendrite development	6	0.246914	0.000164916	ENSG00000187323, ENSG00000137261, ENSG00000142453, ENSG00000119866, ENSG00000165527, ENSG00000063015	2104	6	16792	7.98099	0.531792	0.0463206	0.31064
GOTERM_BP_DIRECT	GO:0006397~mRNA processing	41	1.68724	0.000168487	ENSG00000096063, ENSG00000119314, ENSG00000103005, ENSG00000064607, ENSG00000054118, ENSG00000161082, ENSG00000119707, ENSG00000197976, ENSG00000173914, ENSG00000182872, ENSG00000131773, ENSG00000122257, ENSG00000121274, ENSG00000117360, ENSG00000162664, ENSG00000163166, ENSG00000140488, ENSG00000148843, ENSG00000070047, ENSG00000109111, ENSG00000106344, ENSG00000155966, ENSG00000109917, ENSG0000…	2104	179	16792	1.82805	0.539422	0.04458	0.317354
GOTERM_BP_DIRECT	GO:0016567~protein ubiquitination	70	2.88066	0.00016897	ENSG00000197323, ENSG00000154710, ENSG00000105879, ENSG00000165572, ENSG00000130338, ENSG00000197705, ENSG00000139946, ENSG00000128731, ENSG00000180537, ENSG00000135686, ENSG00000166233, ENSG00000162722, ENSG00000114648, ENSG00000198373, ENSG00000110042, ENSG00000135506, ENSG00000063978, ENSG00000118496, ENSG00000170852, ENSG00000213160, ENSG00000184634, ENSG00000183655, ENSG00000214357, ENSG0000…	2104	359	16792	1.55618	0.540445	0.0422747	0.318264
GOTERM_BP_DIRECT	GO:0080182~histone H3-K4 trimethylation	9	0.37037	0.000169679	ENSG00000032219, ENSG00000178409, ENSG00000147162, ENSG00000168769, ENSG00000118058, ENSG00000198730, ENSG00000187605, ENSG00000137815, ENSG00000164091	2104	15	16792	4.78859	0.541942	0.0402598	0.319597
GOTERM_BP_DIRECT	GO:0050684~regulation of mRNA processing	7	0.288066	0.000229516	ENSG00000096063, ENSG00000109111, ENSG00000137776, ENSG00000160633, ENSG00000130254, ENSG00000163166, ENSG00000008128	2104	9	16792	6.20744	0.652198	0.0514361	0.432071
GOTERM_BP_DIRECT	GO:0007157~heterophilic cell-cell adhesion via plasma membrane cell adhesion molecules	17	0.699588	0.000257664	ENSG00000153707, ENSG00000149256, ENSG00000139211, ENSG00000176020, ENSG00000196159, ENSG00000154639, ENSG00000179242, ENSG00000169760, ENSG00000072071, ENSG00000182985, ENSG00000166341, ENSG00000145934, ENSG00000091972, ENSG00000218336, ENSG00000179915, ENSG00000105767, ENSG00000170558	2104	50	16792	2.71354	0.694457	0.0548959	0.484939
GOTERM_BP_DIRECT	GO:0071526~semaphorin-plexin signaling pathway	13	0.534979	0.00040361	ENSG00000076356, ENSG00000075223, ENSG00000221866, ENSG00000130827, ENSG00000075213, ENSG00000185033, ENSG00000168758, ENSG00000170381, ENSG00000095539, ENSG00000143434, ENSG00000001617, ENSG00000092421, ENSG00000137872	2104	33	16792	3.14403	0.84392	0.0809609	0.75863
GOTERM_BP_DIRECT	GO:0006306~DNA methylation	11	0.452675	0.000508256	ENSG00000102974, ENSG00000178409, ENSG00000118058, ENSG00000181090, ENSG00000204371, ENSG00000149480, ENSG00000119772, ENSG00000085224, ENSG00000005483, ENSG00000171681, ENSG00000143614	2104	25	16792	3.51163	0.903584	0.0966987	0.954432
GOTERM_BP_DIRECT	GO:0042787~protein ubiquitination involved in ubiquitin-dependent protein catabolic process	35	1.44033	0.000556636	ENSG00000105325, ENSG00000157450, ENSG00000108854, ENSG00000147133, ENSG00000128731, ENSG00000086758, ENSG00000145860, ENSG00000122257, ENSG00000166233, ENSG00000145332, ENSG00000002746, ENSG00000198373, ENSG00000116514, ENSG00000135506, ENSG00000151692, ENSG00000126107, ENSG00000165338, ENSG00000141622, ENSG00000196470, ENSG00000186231, ENSG00000183655, ENSG00000092148, ENSG00000119682, ENSG0000…	2104	153	16792	1.82572	0.922834	0.101242	1.04483
GOTERM_BP_DIRECT	GO:0045944~positive regulation of transcription from RNA polymerase II promoter	158	6.50206	0.000596326	ENSG00000128908, ENSG00000032219, ENSG00000182687, ENSG00000160199, ENSG00000169946, ENSG00000168826, ENSG00000100207, ENSG00000080503, ENSG00000116128, ENSG00000100201, ENSG00000188994, ENSG00000008441, ENSG00000173039, ENSG00000078699, ENSG00000204217, ENSG00000140464, ENSG00000198914, ENSG00000198911, ENSG00000118689, ENSG00000122641, ENSG00000166529, ENSG00000174953, ENSG00000141456, ENSG0000…	2104	981	16792	1.28542	0.93572	0.103969	1.11893
GOTERM_BP_DIRECT	GO:0045893~positive regulation of transcription, DNA-templated	91	3.74486	0.000597093	ENSG00000127616, ENSG00000168556, ENSG00000174136, ENSG00000141040, ENSG00000080503, ENSG00000189298, ENSG00000073921, ENSG00000118263, ENSG00000081189, ENSG00000108557, ENSG00000124151, ENSG00000103126, ENSG00000005483, ENSG00000174804, ENSG00000173039, ENSG00000184402, ENSG00000162714, ENSG00000063978, ENSG00000198914, ENSG00000184939, ENSG00000118689, ENSG00000122641, ENSG00000198707, ENSG0000…	2104	515	16792	1.41023	0.935947	0.1003	1.12037
GOTERM_BP_DIRECT	GO:0045773~positive regulation of axon extension	12	0.493827	0.000646015	ENSG00000187164, ENSG00000082701, ENSG00000167178, ENSG00000112658, ENSG00000179242, ENSG00000110321, ENSG00000101126, ENSG00000186868, ENSG00000018189, ENSG00000127603, ENSG00000198910, ENSG00000131711	2104	30	16792	3.1924	0.948864	0.104275	1.21163
GOTERM_BP_DIRECT	GO:0048843~negative regulation of axon extension involved in axon guidance	11	0.452675	0.000733899	ENSG00000075223, ENSG00000130827, ENSG00000185033, ENSG00000075213, ENSG00000168758, ENSG00000170381, ENSG00000095539, ENSG00000143434, ENSG00000001617, ENSG00000092421, ENSG00000137872	2104	26	16792	3.37657	0.965881	0.113647	1.37539
GOTERM_BP_DIRECT	GO:0048666~neuron development	15	0.617284	0.00107857	ENSG00000149256, ENSG00000128342, ENSG00000112658, ENSG00000154429, ENSG00000157933, ENSG00000081189, ENSG00000113657, ENSG00000187742, ENSG00000092969, ENSG00000145242, ENSG00000137343, ENSG00000171532, ENSG00000218336, ENSG00000132932, ENSG00000136720	2104	46	16792	2.6025	0.993023	0.157359	2.01514
GOTERM_BP_DIRECT	GO:0051965~positive regulation of synapse assembly	18	0.740741	0.00122983	ENSG00000139211, ENSG00000176020, ENSG00000146006, ENSG00000169057, ENSG00000169760, ENSG00000154764, ENSG00000072071, ENSG00000150471, ENSG00000154928, ENSG00000133216, ENSG00000140538, ENSG00000185070, ENSG00000169992, ENSG00000196338, ENSG00000101126, ENSG00000179915, ENSG00000135298, ENSG00000184349	2104	62	16792	2.31706	0.996524	0.17199	2.29463
GOTERM_BP_DIRECT	GO:0048671~negative regulation of collateral sprouting	6	0.246914	0.00123672	ENSG00000135333, ENSG00000182175, ENSG00000006652, ENSG00000187323, ENSG00000083290, ENSG00000119866	2104	8	16792	5.98574	0.996633	0.167787	2.30736
GOTERM_BP_DIRECT	GO:0008380~RNA splicing	36	1.48148	0.00126282	ENSG00000096063, ENSG00000119314, ENSG00000103005, ENSG00000064607, ENSG00000054118, ENSG00000116679, ENSG00000119707, ENSG00000197976, ENSG00000173914, ENSG00000182872, ENSG00000114503, ENSG00000117360, ENSG00000163166, ENSG00000162664, ENSG00000174243, ENSG00000139910, ENSG00000109111, ENSG00000106344, ENSG00000159409, ENSG00000155966, ENSG00000109917, ENSG00000124383, ENSG00000139675, ENSG0000…	2104	166	16792	1.73082	0.997014	0.166136	2.3555
GOTERM_BP_DIRECT	GO:0050808~synapse organization	12	0.493827	0.00160283	ENSG00000188064, ENSG00000169992, ENSG00000188157, ENSG00000146006, ENSG00000165699, ENSG00000169760, ENSG00000176204, ENSG00000242419, ENSG00000170381, ENSG00000196338, ENSG00000169862, ENSG00000240764	2104	33	16792	2.90218	0.999377	0.200407	2.98067
GOTERM_BP_DIRECT	GO:0051568~histone H3-K4 methylation	9	0.37037	0.00186196	ENSG00000118058, ENSG00000099381, ENSG00000167548, ENSG00000139718, ENSG00000055609, ENSG00000005483, ENSG00000147050, ENSG00000164091, ENSG00000196363	2104	20	16792	3.59144	0.999811	0.222912	3.45459
GOTERM_BP_DIRECT	GO:2000311~regulation of alpha-amino-3-hydroxy-5-methyl-4-isoxazole propionate selective glutamate receptor activity	8	0.329218	0.0019514	ENSG00000169992, ENSG00000143786, ENSG00000105605, ENSG00000169760, ENSG00000081189, ENSG00000179915, ENSG00000237515, ENSG00000075461	2104	16	16792	3.99049	0.999875	0.226458	3.61764
GOTERM_BP_DIRECT	GO:0051056~regulation of small GTPase mediated signal transduction	30	1.23457	0.00209453	ENSG00000147799, ENSG00000102606, ENSG00000154358, ENSG00000160293, ENSG00000031003, ENSG00000186716, ENSG00000105738, ENSG00000196935, ENSG00000205726, ENSG00000136895, ENSG00000089639, ENSG00000188559, ENSG00000104140, ENSG00000127084, ENSG00000104880, ENSG00000066933, ENSG00000090924, ENSG00000138640, ENSG00000004777, ENSG00000139132, ENSG00000116584, ENSG00000241484, ENSG00000105647, ENSG0000…	2104	134	16792	1.78679	0.999935	0.235072	3.87806
GOTERM_BP_DIRECT	GO:0016573~histone acetylation	12	0.493827	0.00210478	ENSG00000122728, ENSG00000173011, ENSG00000140396, ENSG00000196367, ENSG00000169057, ENSG00000156650, ENSG00000083168, ENSG00000147133, ENSG00000135999, ENSG00000080603, ENSG00000005339, ENSG00000124151	2104	34	16792	2.81682	0.999938	0.230495	3.89667
GOTERM_BP_DIRECT	GO:0022604~regulation of cell morphogenesis	10	0.411523	0.00231502	ENSG00000186174, ENSG00000019995, ENSG00000176293, ENSG00000130559, ENSG00000134698, ENSG00000147130, ENSG00000198218, ENSG00000121741, ENSG00000143093, ENSG00000184349	2104	25	16792	3.1924	0.999977	0.244688	4.2779
GOTERM_BP_DIRECT	GO:0000226~microtubule cytoskeleton organization	19	0.781893	0.00235961	ENSG00000163539, ENSG00000118200, ENSG00000074054, ENSG00000100014, ENSG00000007047, ENSG00000076826, ENSG00000034677, ENSG00000131711, ENSG00000101004, ENSG00000066629, ENSG00000138162, ENSG00000109917, ENSG00000075413, ENSG00000116641, ENSG00000186868, ENSG00000044090, ENSG00000116141, ENSG00000143924, ENSG00000072832	2104	71	16792	2.13576	0.999981	0.243235	4.35858
GOTERM_BP_DIRECT	GO:0021785~branchiomotor neuron axon guidance	6	0.246914	0.00249573	ENSG00000076356, ENSG00000114554, ENSG00000221866, ENSG00000130827, ENSG00000075213, ENSG00000001617	2104	9	16792	5.32066	0.99999	0.249811	4.60445
GOTERM_BP_DIRECT	GO:0044255~cellular lipid metabolic process	13	0.534979	0.00345769	ENSG00000140396, ENSG00000084676, ENSG00000115159, ENSG00000082269, ENSG00000137574, ENSG00000142453, ENSG00000005339, ENSG00000141027, ENSG00000145217, ENSG00000125686, ENSG00000198646, ENSG00000127511, ENSG00000177200	2104	41	16792	2.53056	1	0.322057	6.32499
GOTERM_BP_DIRECT	GO:0006396~RNA processing	23	0.946502	0.00377386	ENSG00000105323, ENSG00000004534, ENSG00000064607, ENSG00000100697, ENSG00000048740, ENSG00000003756, ENSG00000067248, ENSG00000100201, ENSG00000134815, ENSG00000133858, ENSG00000150990, ENSG00000075856, ENSG00000090621, ENSG00000139910, ENSG00000085872, ENSG00000163214, ENSG00000099995, ENSG00000124383, ENSG00000171824, ENSG00000163714, ENSG00000047188, ENSG00000061936, ENSG00000174953	2104	97	16792	1.8924	1	0.339131	6.88405
GOTERM_BP_DIRECT	GO:0032956~regulation of actin cytoskeleton organization	14	0.576132	0.00410506	ENSG00000100106, ENSG00000176749, ENSG00000163539, ENSG00000097007, ENSG00000130787, ENSG00000150764, ENSG00000092969, ENSG00000145242, ENSG00000162738, ENSG00000123384, ENSG00000115355, ENSG00000160007, ENSG00000167193, ENSG00000184349	2104	47	16792	2.37732	1	0.356057	7.46628
GOTERM_BP_DIRECT	GO:0034332~adherens junction organization	12	0.493827	0.00441351	ENSG00000113361, ENSG00000039068, ENSG00000140937, ENSG00000103653, ENSG00000130396, ENSG00000062038, ENSG00000179242, ENSG00000139880, ENSG00000182985, ENSG00000197122, ENSG00000173801, ENSG00000170558	2104	37	16792	2.58843	1	0.370314	8.00541
GOTERM_BP_DIRECT	GO:1904837~beta-catenin-TCF complex assembly	13	0.534979	0.00529636	ENSG00000186174, ENSG00000127616, ENSG00000136997, ENSG00000167548, ENSG00000116128, ENSG00000005339, ENSG00000140332, ENSG00000133895, ENSG00000106829, ENSG00000196367, ENSG00000168646, ENSG00000171016, ENSG00000166477	2104	43	16792	2.41286	1	0.418975	9.53216
GOTERM_BP_DIRECT	GO:0006468~protein phosphorylation	77	3.16872	0.00537035	ENSG00000142178, ENSG00000096063, ENSG00000100077, ENSG00000183496, ENSG00000154310, ENSG00000154358, ENSG00000007047, ENSG00000163788, ENSG00000107779, ENSG00000125388, ENSG00000206203, ENSG00000155111, ENSG00000136021, ENSG00000044446, ENSG00000073331, ENSG00000099725, ENSG00000135503, ENSG00000101266, ENSG00000101265, ENSG00000165238, ENSG00000159899, ENSG00000142235, ENSG00000070770, ENSG0000…	2104	456	16792	1.34767	1	0.416435	9.65903
GOTERM_BP_DIRECT	GO:0031175~neuron projection development	23	0.946502	0.00554961	ENSG00000158555, ENSG00000182687, ENSG00000176749, ENSG00000112658, ENSG00000118200, ENSG00000103657, ENSG00000169760, ENSG00000066777, ENSG00000166900, ENSG00000076826, ENSG00000196588, ENSG00000143258, ENSG00000039068, ENSG00000110047, ENSG00000149294, ENSG00000167654, ENSG00000130559, ENSG00000111737, ENSG00000169258, ENSG00000130939, ENSG00000116641, ENSG00000100139, ENSG00000196363	2104	100	16792	1.83563	1	0.420033	9.96567
GOTERM_BP_DIRECT	GO:0006366~transcription from RNA polymerase II promoter	85	3.49794	0.00573389	ENSG00000032219, ENSG00000028277, ENSG00000103168, ENSG00000160199, ENSG00000162599, ENSG00000184486, ENSG00000081189, ENSG00000011007, ENSG00000113649, ENSG00000188994, ENSG00000180535, ENSG00000114503, ENSG00000177732, ENSG00000008441, ENSG00000173039, ENSG00000086102, ENSG00000070047, ENSG00000198373, ENSG00000204217, ENSG00000147862, ENSG00000196235, ENSG00000141644, ENSG00000118689, ENSG0000…	2104	513	16792	1.32239	1	0.423741	10.2799
GOTERM_BP_DIRECT	GO:0001843~neural tube closure	19	0.781893	0.005982	ENSG00000182175, ENSG00000120254, ENSG00000184634, ENSG00000168758, ENSG00000157933, ENSG00000117713, ENSG00000107882, ENSG00000206557, ENSG00000092969, ENSG00000175104, ENSG00000181555, ENSG00000147050, ENSG00000204138, ENSG00000138802, ENSG00000165699, ENSG00000162738, ENSG00000103197, ENSG00000160007, ENSG00000164442	2104	77	16792	1.96933	1	0.430721	10.7013
GOTERM_BP_DIRECT	GO:0050798~activated T cell proliferation	5	0.205761	0.00627036	ENSG00000010810, ENSG00000026950, ENSG00000097007, ENSG00000182985, ENSG00000182568	2104	7	16792	5.70071	1	0.439438	11.1887
GOTERM_BP_DIRECT	GO:0048841~regulation of axon extension involved in axon guidance	5	0.205761	0.00627036	ENSG00000076356, ENSG00000114554, ENSG00000221866, ENSG00000130827, ENSG00000075213	2104	7	16792	5.70071	1	0.439438	11.1887
GOTERM_BP_DIRECT	GO:0060992~response to fungicide	5	0.205761	0.00627036	ENSG00000181090, ENSG00000117139, ENSG00000204371, ENSG00000145545, ENSG00000132510	2104	7	16792	5.70071	1	0.439438	11.1887
GOTERM_BP_DIRECT	GO:0046627~negative regulation of insulin receptor signaling pathway	10	0.411523	0.00713794	ENSG00000175354, ENSG00000114737, ENSG00000120833, ENSG00000169047, ENSG00000165699, ENSG00000188394, ENSG00000103197, ENSG00000124160, ENSG00000196396, ENSG00000173039	2104	29	16792	2.75207	1	0.476	12.64
GOTERM_BP_DIRECT	GO:0019827~stem cell population maintenance	14	0.576132	0.00724369	ENSG00000184634, ENSG00000128342, ENSG00000099381, ENSG00000107779, ENSG00000134744, ENSG00000184708, ENSG00000143033, ENSG00000110367, ENSG00000198730, ENSG00000157404, ENSG00000137815, ENSG00000164190, ENSG00000166477, ENSG00000144535	2104	50	16792	2.23468	1	0.474424	12.8154
GOTERM_BP_DIRECT	GO:0009791~post-embryonic development	18	0.740741	0.00772947	ENSG00000056586, ENSG00000169057, ENSG00000118058, ENSG00000168769, ENSG00000186051, ENSG00000117139, ENSG00000197081, ENSG00000075223, ENSG00000156052, ENSG00000204120, ENSG00000171791, ENSG00000169432, ENSG00000159307, ENSG00000153234, ENSG00000159256, ENSG00000136381, ENSG00000171016, ENSG00000171310	2104	73	16792	1.96791	1	0.490137	13.6166
GOTERM_BP_DIRECT	GO:0001755~neural crest cell migration	13	0.534979	0.00783806	ENSG00000135914, ENSG00000075223, ENSG00000075213, ENSG00000185033, ENSG00000168758, ENSG00000170381, ENSG00000095539, ENSG00000143434, ENSG00000001617, ENSG00000115170, ENSG00000092421, ENSG00000137872, ENSG00000204138	2104	45	16792	2.30562	1	0.488528	13.7948
GOTERM_BP_DIRECT	GO:0043984~histone H4-K16 acetylation	8	0.329218	0.00841446	ENSG00000188895, ENSG00000147162, ENSG00000120071, ENSG00000118058, ENSG00000025293, ENSG00000172534, ENSG00000196363, ENSG00000144445	2104	20	16792	3.1924	1	0.506823	14.7346
GOTERM_BP_DIRECT	GO:0032922~circadian regulation of gene expression	15	0.617284	0.00924166	ENSG00000141551, ENSG00000140396, ENSG00000147162, ENSG00000118058, ENSG00000140464, ENSG00000182979, ENSG00000173914, ENSG00000108557, ENSG00000115738, ENSG00000198380, ENSG00000198900, ENSG00000096717, ENSG00000213923, ENSG00000140836, ENSG00000008405	2104	57	16792	2.10026	1	0.533656	16.0665
GOTERM_BP_DIRECT	GO:0001764~neuron migration	23	0.946502	0.0100044	ENSG00000124486, ENSG00000119042, ENSG00000134121, ENSG00000176749, ENSG00000112658, ENSG00000081189, ENSG00000174013, ENSG00000150471, ENSG00000196588, ENSG00000140538, ENSG00000010810, ENSG00000137285, ENSG00000075213, ENSG00000185900, ENSG00000134369, ENSG00000187323, ENSG00000153234, ENSG00000077279, ENSG00000137261, ENSG00000186868, ENSG00000139197, ENSG00000116141, ENSG00000092421	2104	105	16792	1.74822	1	0.555859	17.277
GOTERM_BP_DIRECT	GO:0006349~regulation of gene expression by genetic imprinting	7	0.288066	0.0100334	ENSG00000032219, ENSG00000082701, ENSG00000102974, ENSG00000169057, ENSG00000165097, ENSG00000119772, ENSG00000054267	2104	16	16792	3.49168	1	0.550645	17.3227
GOTERM_BP_DIRECT	GO:0030036~actin cytoskeleton organization	27	1.11111	0.0100956	ENSG00000097007, ENSG00000100014, ENSG00000196588, ENSG00000100592, ENSG00000143322, ENSG00000150361, ENSG00000141298, ENSG00000204991, ENSG00000138594, ENSG00000186716, ENSG00000186765, ENSG00000173210, ENSG00000160999, ENSG00000150594, ENSG00000106789, ENSG00000170873, ENSG00000104880, ENSG00000075340, ENSG00000127084, ENSG00000112290, ENSG00000204138, ENSG00000139132, ENSG00000134278, ENSG0000…	2104	130	16792	1.65759	1	0.54674	17.4207
GOTERM_BP_DIRECT	GO:0010507~negative regulation of autophagy	11	0.452675	0.0108863	ENSG00000135914, ENSG00000157625, ENSG00000187626, ENSG00000178252, ENSG00000171791, ENSG00000066135, ENSG00000112977, ENSG00000103657, ENSG00000189298, ENSG00000110321, ENSG00000132405	2104	36	16792	2.43864	1	0.56802	18.6561
GOTERM_BP_DIRECT	GO:0010458~exit from mitosis	6	0.246914	0.0113464	ENSG00000021574, ENSG00000147457, ENSG00000060069, ENSG00000163539, ENSG00000074054, ENSG00000151491	2104	12	16792	3.99049	1	0.577137	19.3669
GOTERM_BP_DIRECT	GO:1902287~semaphorin-plexin signaling pathway involved in axon guidance	6	0.246914	0.0113464	ENSG00000076356, ENSG00000114554, ENSG00000221866, ENSG00000130827, ENSG00000075213, ENSG00000001617	2104	12	16792	3.99049	1	0.577137	19.3669
GOTERM_BP_DIRECT	GO:1990090~cellular response to nerve growth factor stimulus	10	0.411523	0.0114105	ENSG00000141551, ENSG00000107263, ENSG00000110047, ENSG00000196689, ENSG00000111737, ENSG00000118689, ENSG00000100139, ENSG00000171634, ENSG00000134313, ENSG00000213923	2104	31	16792	2.57451	1	0.573284	19.4655
GOTERM_BP_DIRECT	GO:0018105~peptidyl-serine phosphorylation	26	1.06996	0.0114873	ENSG00000117020, ENSG00000176749, ENSG00000169118, ENSG00000107643, ENSG00000147133, ENSG00000086015, ENSG00000089022, ENSG00000197122, ENSG00000141551, ENSG00000082701, ENSG00000157106, ENSG00000171791, ENSG00000152953, ENSG00000173273, ENSG00000163673, ENSG00000183943, ENSG00000180370, ENSG00000166484, ENSG00000077279, ENSG00000159256, ENSG00000145632, ENSG00000157540, ENSG00000105613, ENSG0000…	2104	125	16792	1.66005	1	0.569923	19.5834
GOTERM_BP_DIRECT	GO:0060070~canonical Wnt signaling pathway	19	0.781893	0.0132172	ENSG00000186174, ENSG00000136997, ENSG00000100068, ENSG00000184634, ENSG00000060656, ENSG00000062038, ENSG00000116128, ENSG00000154764, ENSG00000161202, ENSG00000150764, ENSG00000103126, ENSG00000100888, ENSG00000174804, ENSG00000147050, ENSG00000188064, ENSG00000019549, ENSG00000082701, ENSG00000153234, ENSG00000124766	2104	83	16792	1.82697	1	0.615776	22.1971
GOTERM_BP_DIRECT	GO:0048813~dendrite morphogenesis	11	0.452675	0.0132836	ENSG00000010810, ENSG00000152767, ENSG00000171587, ENSG00000075213, ENSG00000142599, ENSG00000147852, ENSG00000100320, ENSG00000073921, ENSG00000118263, ENSG00000077279, ENSG00000134313	2104	37	16792	2.37273	1	0.611934	22.2958
GOTERM_BP_DIRECT	GO:0016571~histone methylation	7	0.288066	0.0138907	ENSG00000169057, ENSG00000181090, ENSG00000204371, ENSG00000165671, ENSG00000142453, ENSG00000147548, ENSG00000182568	2104	17	16792	3.28629	1	0.622859	23.1926
GOTERM_BP_DIRECT	GO:2000809~positive regulation of synaptic vesicle clustering	4	0.164609	0.0161218	ENSG00000169992, ENSG00000169760, ENSG00000196338, ENSG00000170558	2104	5	16792	6.38479	1	0.672456	26.4054
GOTERM_BP_DIRECT	GO:0021960~anterior commissure morphogenesis	4	0.164609	0.0161218	ENSG00000182704, ENSG00000221866, ENSG00000147862, ENSG00000174013	2104	5	16792	6.38479	1	0.672456	26.4054
GOTERM_BP_DIRECT	GO:0021637~trigeminal nerve structural organization	4	0.164609	0.0161218	ENSG00000221866, ENSG00000130827, ENSG00000075213, ENSG00000001617	2104	5	16792	6.38479	1	0.672456	26.4054
GOTERM_BP_DIRECT	GO:0007010~cytoskeleton organization	31	1.27572	0.0162452	ENSG00000111859, ENSG00000154310, ENSG00000138443, ENSG00000092964, ENSG00000198218, ENSG00000135596, ENSG00000137285, ENSG00000243156, ENSG00000176293, ENSG00000105738, ENSG00000173210, ENSG00000147130, ENSG00000105613, ENSG00000101349, ENSG00000116141, ENSG00000121741, ENSG00000092421, ENSG00000188157, ENSG00000145362, ENSG00000127084, ENSG00000086015, ENSG00000165288, ENSG00000127603, ENSG0000…	2104	161	16792	1.53671	1	0.669849	26.5794
GOTERM_BP_DIRECT	GO:0048268~clathrin coat assembly	6	0.246914	0.0165647	ENSG00000130475, ENSG00000168824, ENSG00000170091, ENSG00000073921, ENSG00000006125, ENSG00000157107	2104	13	16792	3.68353	1	0.671692	27.0279
GOTERM_BP_DIRECT	GO:0048872~homeostasis of number of cells	6	0.246914	0.0165647	ENSG00000130396, ENSG00000075856, ENSG00000101265, ENSG00000085721, ENSG00000114742, ENSG00000170558	2104	13	16792	3.68353	1	0.671692	27.0279
GOTERM_BP_DIRECT	GO:0023014~signal transduction by protein phosphorylation	12	0.493827	0.0174269	ENSG00000171105, ENSG00000172939, ENSG00000135503, ENSG00000204217, ENSG00000121989, ENSG00000180370, ENSG00000107779, ENSG00000115170, ENSG00000092969, ENSG00000101349, ENSG00000137601, ENSG00000071054	2104	44	16792	2.17663	1	0.685114	28.2254
GOTERM_BP_DIRECT	GO:0097105~presynaptic membrane assembly	5	0.205761	0.0183506	ENSG00000153707, ENSG00000169992, ENSG00000169760, ENSG00000196338, ENSG00000179915	2104	9	16792	4.43388	1	0.698871	29.4875
GOTERM_BP_DIRECT	GO:0007413~axonal fasciculation	7	0.288066	0.0186721	ENSG00000153266, ENSG00000176749, ENSG00000075213, ENSG00000115310, ENSG00000118432, ENSG00000160007, ENSG00000133216	2104	18	16792	3.10372	1	0.700151	29.9218
GOTERM_BP_DIRECT	GO:0048013~ephrin receptor signaling pathway	19	0.781893	0.0187952	ENSG00000135333, ENSG00000176749, ENSG00000102606, ENSG00000099617, ENSG00000197122, ENSG00000154928, ENSG00000064999, ENSG00000006125, ENSG00000133216, ENSG00000140538, ENSG00000145242, ENSG00000010810, ENSG00000108947, ENSG00000160293, ENSG00000071051, ENSG00000205726, ENSG00000167193, ENSG00000143590, ENSG00000184349	2104	86	16792	1.76324	1	0.697564	30.0875
GOTERM_BP_DIRECT	GO:0051966~regulation of synaptic transmission, glutamatergic	8	0.329218	0.0190186	ENSG00000157680, ENSG00000164082, ENSG00000118432, ENSG00000081189, ENSG00000168959, ENSG00000079482, ENSG00000198822, ENSG00000113262	2104	23	16792	2.776	1	0.696958	30.3872
GOTERM_BP_DIRECT	GO:0010923~negative regulation of phosphatase activity	13	0.534979	0.0213587	ENSG00000152767, ENSG00000166897, ENSG00000165861, ENSG00000076826, ENSG00000167716, ENSG00000139746, ENSG00000178662, ENSG00000110925, ENSG00000160208, ENSG00000124383, ENSG00000142235, ENSG00000102290, ENSG00000196422	2104	51	16792	2.03437	1	0.734058	33.4538
GOTERM_BP_DIRECT	GO:0046777~protein autophosphorylation	32	1.31687	0.0229125	ENSG00000171105, ENSG00000142178, ENSG00000103653, ENSG00000198909, ENSG00000154310, ENSG00000183496, ENSG00000097007, ENSG00000147133, ENSG00000197122, ENSG00000198873, ENSG00000154928, ENSG00000140538, ENSG00000206203, ENSG00000157106, ENSG00000135503, ENSG00000186716, ENSG00000183943, ENSG00000165238, ENSG00000140443, ENSG00000178607, ENSG00000167258, ENSG00000089022, ENSG00000196632, ENSG0000…	2104	172	16792	1.48484	1	0.754203	35.419
GOTERM_BP_DIRECT	GO:0032968~positive regulation of transcription elongation from RNA polymerase II promoter	6	0.246914	0.0231598	ENSG00000109111, ENSG00000198730, ENSG00000137815, ENSG00000141867, ENSG00000125651, ENSG00000166477	2104	14	16792	3.42042	1	0.75344	35.7266
GOTERM_BP_DIRECT	GO:0048009~insulin-like growth factor receptor signaling pathway	6	0.246914	0.0231598	ENSG00000204120, ENSG00000169047, ENSG00000103197, ENSG00000197081, ENSG00000140443, ENSG00000146830	2104	14	16792	3.42042	1	0.75344	35.7266
GOTERM_BP_DIRECT	GO:0032784~regulation of DNA-templated transcription, elongation	6	0.246914	0.0231598	ENSG00000225830, ENSG00000198728, ENSG00000158941, ENSG00000196235, ENSG00000162664, ENSG00000163166	2104	14	16792	3.42042	1	0.75344	35.7266
GOTERM_BP_DIRECT	GO:0010976~positive regulation of neuron projection development	19	0.781893	0.0260326	ENSG00000107263, ENSG00000182175, ENSG00000145868, ENSG00000085721, ENSG00000117598, ENSG00000113657, ENSG00000113273, ENSG00000143322, ENSG00000010810, ENSG00000141699, ENSG00000118432, ENSG00000078699, ENSG00000198947, ENSG00000218336, ENSG00000132932, ENSG00000119866, ENSG00000160007, ENSG00000134313, ENSG00000119283	2104	89	16792	1.70381	1	0.789007	39.2002
GOTERM_BP_DIRECT	GO:0060174~limb bud formation	5	0.205761	0.0275986	ENSG00000076356, ENSG00000075223, ENSG00000124766, ENSG00000176887, ENSG00000070193	2104	10	16792	3.99049	1	0.804061	41.018
GOTERM_BP_DIRECT	GO:0034773~histone H4-K20 trimethylation	4	0.164609	0.0292607	ENSG00000032219, ENSG00000178409, ENSG00000110066, ENSG00000054267	2104	6	16792	5.32066	1	0.818766	42.8911
GOTERM_BP_DIRECT	GO:2000651~positive regulation of sodium ion transmembrane transporter activity	4	0.164609	0.0292607	ENSG00000151150, ENSG00000198947, ENSG00000165238, ENSG00000196632	2104	6	16792	5.32066	1	0.818766	42.8911
GOTERM_BP_DIRECT	GO:0097104~postsynaptic membrane assembly	4	0.164609	0.0292607	ENSG00000169992, ENSG00000169760, ENSG00000196338, ENSG00000179915	2104	6	16792	5.32066	1	0.818766	42.8911
GOTERM_BP_DIRECT	GO:0031113~regulation of microtubule polymerization	4	0.164609	0.0292607	ENSG00000097007, ENSG00000163539, ENSG00000109171, ENSG00000186868	2104	6	16792	5.32066	1	0.818766	42.8911
GOTERM_BP_DIRECT	GO:0046580~negative regulation of Ras protein signal transduction	8	0.329218	0.0298566	ENSG00000155903, ENSG00000107263, ENSG00000154710, ENSG00000075391, ENSG00000213024, ENSG00000092969, ENSG00000119283, ENSG00000035862	2104	25	16792	2.55392	1	0.821249	43.5487
GOTERM_BP_DIRECT	GO:0007040~lysosome organization	10	0.411523	0.0300696	ENSG00000187626, ENSG00000177182, ENSG00000165029, ENSG00000138760, ENSG00000189298, ENSG00000051009, ENSG00000111670, ENSG00000100099, ENSG00000143669, ENSG00000113273	2104	36	16792	2.21694	1	0.819691	43.7821
GOTERM_BP_DIRECT	GO:0048536~spleen development	10	0.411523	0.0300696	ENSG00000056586, ENSG00000171791, ENSG00000097007, ENSG00000168769, ENSG00000118058, ENSG00000135870, ENSG00000185630, ENSG00000070193, ENSG00000162769, ENSG00000164442	2104	36	16792	2.21694	1	0.819691	43.7821
GOTERM_BP_DIRECT	GO:0048821~erythrocyte development	6	0.246914	0.0312384	ENSG00000032219, ENSG00000125686, ENSG00000138594, ENSG00000112658, ENSG00000070495, ENSG00000164442	2104	15	16792	3.1924	1	0.827832	45.0463
GOTERM_BP_DIRECT	GO:0035556~intracellular signal transduction	64	2.63374	0.03631	ENSG00000142178, ENSG00000096063, ENSG00000198909, ENSG00000154310, ENSG00000130338, ENSG00000163788, ENSG00000077044, ENSG00000235568, ENSG00000155903, ENSG00000157680, ENSG00000206203, ENSG00000131370, ENSG00000152953, ENSG00000165238, ENSG00000159899, ENSG00000118507, ENSG00000005249, ENSG00000089639, ENSG00000171621, ENSG00000117020, ENSG00000151208, ENSG00000106789, ENSG00000086015, ENSG0000…	2104	403	16792	1.26745	1	0.868117	50.2269
GOTERM_BP_DIRECT	GO:0051491~positive regulation of filopodium assembly	8	0.329218	0.0365754	ENSG00000188157, ENSG00000101040, ENSG00000112658, ENSG00000145934, ENSG00000169760, ENSG00000117598, ENSG00000137942, ENSG00000113657	2104	26	16792	2.45569	1	0.866935	50.4848
GOTERM_BP_DIRECT	GO:0072661~protein targeting to plasma membrane	8	0.329218	0.0365754	ENSG00000151150, ENSG00000145362, ENSG00000182674, ENSG00000198742, ENSG00000196632, ENSG00000064270, ENSG00000175115, ENSG00000179364	2104	26	16792	2.45569	1	0.866935	50.4848
GOTERM_BP_DIRECT	GO:0035264~multicellular organism growth	17	0.699588	0.0378378	ENSG00000083093, ENSG00000225830, ENSG00000056586, ENSG00000115159, ENSG00000186051, ENSG00000113448, ENSG00000196182, ENSG00000085224, ENSG00000122257, ENSG00000147050, ENSG00000087274, ENSG00000204120, ENSG00000133958, ENSG00000115904, ENSG00000162769, ENSG00000114742, ENSG00000107854	2104	80	16792	1.69596	1	0.873006	51.6945
GOTERM_BP_DIRECT	GO:0031065~positive regulation of histone deacetylation	5	0.205761	0.0391575	ENSG00000011243, ENSG00000168556, ENSG00000140464, ENSG00000105127, ENSG00000164190	2104	11	16792	3.62772	1	0.879063	52.9292
GOTERM_BP_DIRECT	GO:0032206~positive regulation of telomere maintenance	5	0.205761	0.0391575	ENSG00000140464, ENSG00000132604, ENSG00000085224, ENSG00000113522, ENSG00000174953	2104	11	16792	3.62772	1	0.879063	52.9292
GOTERM_BP_DIRECT	GO:0048703~embryonic viscerocranium morphogenesis	5	0.205761	0.0391575	ENSG00000120254, ENSG00000070614, ENSG00000081189, ENSG00000164190, ENSG00000171310	2104	11	16792	3.62772	1	0.879063	52.9292
GOTERM_BP_DIRECT	GO:0030517~negative regulation of axon extension	5	0.205761	0.0391575	ENSG00000176749, ENSG00000115310, ENSG00000162490, ENSG00000006652, ENSG00000119866	2104	11	16792	3.62772	1	0.879063	52.9292
GOTERM_BP_DIRECT	GO:0030520~intracellular estrogen receptor signaling pathway	7	0.288066	0.0393684	ENSG00000140009, ENSG00000198646, ENSG00000100320, ENSG00000117713, ENSG00000142453, ENSG00000160633, ENSG00000197122	2104	21	16792	2.66033	1	0.877538	53.1237
GOTERM_BP_DIRECT	GO:0003007~heart morphogenesis	9	0.37037	0.0397426	ENSG00000185070, ENSG00000135914, ENSG00000171105, ENSG00000171456, ENSG00000196159, ENSG00000164190, ENSG00000092969, ENSG00000108175, ENSG00000147050	2104	32	16792	2.24465	1	0.877114	53.4669
GOTERM_BP_DIRECT	GO:0070507~regulation of microtubule cytoskeleton organization	6	0.246914	0.040877	ENSG00000176749, ENSG00000137343, ENSG00000074054, ENSG00000076826, ENSG00000150764, ENSG00000184349	2104	16	16792	2.99287	1	0.881594	54.4931
GOTERM_BP_DIRECT	GO:0043982~histone H4-K8 acetylation	6	0.246914	0.040877	ENSG00000147162, ENSG00000120071, ENSG00000025293, ENSG00000172534, ENSG00000196363, ENSG00000144445	2104	16	16792	2.99287	1	0.881594	54.4931
GOTERM_BP_DIRECT	GO:0043981~histone H4-K5 acetylation	6	0.246914	0.040877	ENSG00000147162, ENSG00000120071, ENSG00000025293, ENSG00000172534, ENSG00000196363, ENSG00000144445	2104	16	16792	2.99287	1	0.881594	54.4931
GOTERM_BP_DIRECT	GO:0000381~regulation of alternative mRNA splicing, via spliceosome	10	0.411523	0.0414886	ENSG00000140488, ENSG00000054118, ENSG00000119707, ENSG00000003756, ENSG00000159409, ENSG00000100320, ENSG00000099995, ENSG00000139767, ENSG00000182872, ENSG00000157540	2104	38	16792	2.10026	1	0.882632	55.0374
GOTERM_BP_DIRECT	GO:0018107~peptidyl-threonine phosphorylation	10	0.411523	0.0414886	ENSG00000082701, ENSG00000172939, ENSG00000176749, ENSG00000171791, ENSG00000135503, ENSG00000173273, ENSG00000107643, ENSG00000147133, ENSG00000115170, ENSG00000157540	2104	38	16792	2.10026	1	0.882632	55.0374
GOTERM_BP_DIRECT	GO:0035023~regulation of Rho protein signal transduction	17	0.699588	0.0418745	ENSG00000152767, ENSG00000132155, ENSG00000102606, ENSG00000154358, ENSG00000104880, ENSG00000127084, ENSG00000090924, ENSG00000139132, ENSG00000160293, ENSG00000116584, ENSG00000102302, ENSG00000186716, ENSG00000170681, ENSG00000115904, ENSG00000205726, ENSG00000146426, ENSG00000038382	2104	81	16792	1.67502	1	0.882262	55.3776
GOTERM_BP_DIRECT	GO:0021869~forebrain ventricular zone progenitor cell division	3	0.123457	0.0431105	ENSG00000184486, ENSG00000198914, ENSG00000150764	2104	3	16792	7.98099	1	0.886976	56.4511
GOTERM_BP_DIRECT	GO:0031123~RNA 3'-end processing	4	0.164609	0.0465035	ENSG00000083223, ENSG00000115421, ENSG00000134744, ENSG00000218823	2104	7	16792	4.56056	1	0.902784	59.2736
GOTERM_BP_DIRECT	GO:0010586~miRNA metabolic process	4	0.164609	0.0465035	ENSG00000113360, ENSG00000134698, ENSG00000206557, ENSG00000134744	2104	7	16792	4.56056	1	0.902784	59.2736
GOTERM_BP_DIRECT	GO:0003183~mitral valve morphogenesis	4	0.164609	0.0465035	ENSG00000204217, ENSG00000124766, ENSG00000107779, ENSG00000115170	2104	7	16792	4.56056	1	0.902784	59.2736
GOTERM_BP_DIRECT	GO:0007196~adenylate cyclase-inhibiting G-protein coupled glutamate receptor signaling pathway	4	0.164609	0.0465035	ENSG00000164082, ENSG00000198822, ENSG00000113262, ENSG00000163873	2104	7	16792	4.56056	1	0.902784	59.2736
GOTERM_BP_DIRECT	GO:0021902~commitment of neuronal cell to specific neuron type in forebrain	4	0.164609	0.0465035	ENSG00000119042, ENSG00000153266, ENSG00000127152, ENSG00000136535	2104	7	16792	4.56056	1	0.902784	59.2736
GOTERM_BP_DIRECT	GO:0060563~neuroepithelial cell differentiation	4	0.164609	0.0465035	ENSG00000130396, ENSG00000124766, ENSG00000176887, ENSG00000170558	2104	7	16792	4.56056	1	0.902784	59.2736
GOTERM_BP_DIRECT	GO:0043576~regulation of respiratory gaseous exchange	4	0.164609	0.0465035	ENSG00000153234, ENSG00000101188, ENSG00000198743, ENSG00000115687	2104	7	16792	4.56056	1	0.902784	59.2736
GOTERM_BP_DIRECT	GO:0032870~cellular response to hormone stimulus	11	0.452675	0.0484574	ENSG00000166148, ENSG00000142178, ENSG00000150594, ENSG00000172209, ENSG00000084676, ENSG00000140396, ENSG00000120833, ENSG00000185008, ENSG00000137252, ENSG00000196557, ENSG00000175564	2104	45	16792	1.95091	1	0.909792	60.8194
GOTERM_BP_DIRECT	GO:0032436~positive regulation of proteasomal ubiquitin-dependent protein catabolic process	14	0.576132	0.0515591	ENSG00000164197, ENSG00000147133, ENSG00000072609, ENSG00000034677, ENSG00000173334, ENSG00000166233, ENSG00000141551, ENSG00000082701, ENSG00000116514, ENSG00000001629, ENSG00000151692, ENSG00000145632, ENSG00000129993, ENSG00000213923	2104	64	16792	1.74584	1	0.920901	63.1597
GOTERM_BP_DIRECT	GO:0048568~embryonic organ development	6	0.246914	0.0521214	ENSG00000188064, ENSG00000083093, ENSG00000169946, ENSG00000107779, ENSG00000122257, ENSG00000114742	2104	17	16792	2.81682	1	0.921057	63.5695
GOTERM_BP_DIRECT	GO:0007275~multicellular organism development	79	3.25103	0.0525913	ENSG00000144057, ENSG00000182687, ENSG00000128342, ENSG00000154358, ENSG00000121297, ENSG00000077044, ENSG00000174804, ENSG00000163602, ENSG00000188064, ENSG00000160305, ENSG00000134627, ENSG00000206203, ENSG00000185252, ENSG00000130827, ENSG00000068878, ENSG00000117597, ENSG00000109787, ENSG00000197181, ENSG00000143147, ENSG00000099953, ENSG00000147144, ENSG00000005889, ENSG00000176371, ENSG0000…	2104	521	16792	1.21017	1	0.92085	63.9088
GOTERM_BP_DIRECT	GO:0048024~regulation of mRNA splicing, via spliceosome	5	0.205761	0.0530631	ENSG00000096063, ENSG00000083896, ENSG00000070495, ENSG00000121774, ENSG00000131773	2104	12	16792	3.32541	1	0.920654	64.2463
GOTERM_BP_DIRECT	GO:0060997~dendritic spine morphogenesis	5	0.205761	0.0530631	ENSG00000094631, ENSG00000154764, ENSG00000169862, ENSG00000154928, ENSG00000133216	2104	12	16792	3.32541	1	0.920654	64.2463
GOTERM_BP_DIRECT	GO:0090162~establishment of epithelial cell polarity	5	0.205761	0.0530631	ENSG00000114541, ENSG00000074054, ENSG00000105738, ENSG00000151474, ENSG00000165527	2104	12	16792	3.32541	1	0.920654	64.2463
GOTERM_BP_DIRECT	GO:0017148~negative regulation of translation	13	0.534979	0.0530957	ENSG00000129351, ENSG00000136628, ENSG00000149187, ENSG00000206557, ENSG00000184708, ENSG00000196730, ENSG00000135387, ENSG00000204120, ENSG00000165699, ENSG00000088038, ENSG00000136381, ENSG00000111596, ENSG00000115461	2104	58	16792	1.78884	1	0.918746	64.2695
GOTERM_BP_DIRECT	GO:0030178~negative regulation of Wnt signaling pathway	12	0.493827	0.054371	ENSG00000168772, ENSG00000182704, ENSG00000184634, ENSG00000100281, ENSG00000103197, ENSG00000123384, ENSG00000115266, ENSG00000103126, ENSG00000180730, ENSG00000100888, ENSG00000165617, ENSG00000213923	2104	52	16792	1.84177	1	0.921662	65.1664
GOTERM_BP_DIRECT	GO:0071320~cellular response to cAMP	12	0.493827	0.054371	ENSG00000107263, ENSG00000143630, ENSG00000127914, ENSG00000113448, ENSG00000138622, ENSG00000100678, ENSG00000118507, ENSG00000103375, ENSG00000145545, ENSG00000180509, ENSG00000169403, ENSG00000115461	2104	52	16792	1.84177	1	0.921662	65.1664
GOTERM_BP_DIRECT	GO:0048286~lung alveolus development	9	0.37037	0.0548655	ENSG00000056586, ENSG00000165240, ENSG00000128342, ENSG00000204217, ENSG00000196182, ENSG00000079432, ENSG00000106443, ENSG00000136720, ENSG00000115461	2104	34	16792	2.11261	1	0.921554	65.5085
GOTERM_BP_DIRECT	GO:1901796~regulation of signal transduction by p53 class mediator	23	0.946502	0.0569526	ENSG00000122728, ENSG00000163781, ENSG00000070770, ENSG00000064313, ENSG00000152409, ENSG00000176749, ENSG00000083168, ENSG00000204371, ENSG00000147133, ENSG00000089022, ENSG00000149480, ENSG00000122779, ENSG00000156983, ENSG00000177302, ENSG00000127334, ENSG00000170004, ENSG00000165632, ENSG00000025293, ENSG00000181090, ENSG00000140464, ENSG00000101266, ENSG00000131791, ENSG00000113522	2104	124	16792	1.48034	1	0.927152	66.9172
GOTERM_BP_DIRECT	GO:0051726~regulation of cell cycle	23	0.946502	0.0569526	ENSG00000080823, ENSG00000070444, ENSG00000167258, ENSG00000126883, ENSG00000183779, ENSG00000138764, ENSG00000197122, ENSG00000198873, ENSG00000152503, ENSG00000204138, ENSG00000138769, ENSG00000112144, ENSG00000155111, ENSG00000125686, ENSG00000118816, ENSG00000165699, ENSG00000163374, ENSG00000186716, ENSG00000103197, ENSG00000149679, ENSG00000104885, ENSG00000134644, ENSG00000008128	2104	124	16792	1.48034	1	0.927152	66.9172
GOTERM_BP_DIRECT	GO:0043044~ATP-dependent chromatin remodeling	7	0.288066	0.059019	ENSG00000127616, ENSG00000163104, ENSG00000149480, ENSG00000117713, ENSG00000139613, ENSG00000100888, ENSG00000143614	2104	23	16792	2.429	1	0.932204	68.2583
GOTERM_BP_DIRECT	GO:0009267~cellular response to starvation	11	0.452675	0.0626303	ENSG00000169174, ENSG00000133056, ENSG00000204217, ENSG00000116299, ENSG00000204371, ENSG00000165861, ENSG00000198911, ENSG00000126775, ENSG00000145545, ENSG00000125952, ENSG00000096717	2104	47	16792	1.86789	1	0.941229	70.4792
GOTERM_BP_DIRECT	GO:0035335~peptidyl-tyrosine dephosphorylation	19	0.781893	0.0653746	ENSG00000153707, ENSG00000060656, ENSG00000106278, ENSG00000167065, ENSG00000151490, ENSG00000102043, ENSG00000175354, ENSG00000076201, ENSG00000141298, ENSG00000108389, ENSG00000130829, ENSG00000072135, ENSG00000169410, ENSG00000063601, ENSG00000100330, ENSG00000196396, ENSG00000112245, ENSG00000120875, ENSG00000105426	2104	99	16792	1.5317	1	0.94685	72.0676
GOTERM_BP_DIRECT	GO:0042428~serotonin metabolic process	4	0.164609	0.0676232	ENSG00000178394, ENSG00000165240, ENSG00000164197, ENSG00000145545	2104	8	16792	3.99049	1	0.950747	73.3084
GOTERM_BP_DIRECT	GO:2000480~negative regulation of cAMP-dependent protein kinase activity	4	0.164609	0.0676232	ENSG00000171033, ENSG00000005249, ENSG00000096717, ENSG00000114302	2104	8	16792	3.99049	1	0.950747	73.3084
GOTERM_BP_DIRECT	GO:0048261~negative regulation of receptor-mediated endocytosis	4	0.164609	0.0676232	ENSG00000169174, ENSG00000154710, ENSG00000073921, ENSG00000165527	2104	8	16792	3.99049	1	0.950747	73.3084
GOTERM_BP_DIRECT	GO:0033523~histone H2B ubiquitination	4	0.164609	0.0676232	ENSG00000155827, ENSG00000103549, ENSG00000198730, ENSG00000166477	2104	8	16792	3.99049	1	0.950747	73.3084
GOTERM_BP_DIRECT	GO:0021952~central nervous system projection neuron axonogenesis	4	0.164609	0.0676232	ENSG00000153234, ENSG00000077279, ENSG00000154928, ENSG00000133216	2104	8	16792	3.99049	1	0.950747	73.3084
GOTERM_BP_DIRECT	GO:1900364~negative regulation of mRNA polyadenylation	4	0.164609	0.0676232	ENSG00000155827, ENSG00000103549, ENSG00000198730, ENSG00000196235	2104	8	16792	3.99049	1	0.950747	73.3084
GOTERM_BP_DIRECT	GO:0060080~inhibitory postsynaptic potential	4	0.164609	0.0676232	ENSG00000101204, ENSG00000164418, ENSG00000196338, ENSG00000166206	2104	8	16792	3.99049	1	0.950747	73.3084
GOTERM_BP_DIRECT	GO:1904322~cellular response to forskolin	4	0.164609	0.0676232	ENSG00000127955, ENSG00000164742, ENSG00000145242, ENSG00000184349	2104	8	16792	3.99049	1	0.950747	73.3084
GOTERM_BP_DIRECT	GO:0048511~rhythmic process	12	0.493827	0.0685047	ENSG00000142178, ENSG00000158941, ENSG00000126012, ENSG00000176749, ENSG00000198963, ENSG00000169760, ENSG00000101266, ENSG00000117139, ENSG00000107643, ENSG00000001167, ENSG00000005339, ENSG00000120658	2104	54	16792	1.77355	1	0.951355	73.7804
GOTERM_BP_DIRECT	GO:0002087~regulation of respiratory gaseous exchange by neurological system process	5	0.205761	0.0692847	ENSG00000169992, ENSG00000169057, ENSG00000169760, ENSG00000196338, ENSG00000121297	2104	13	16792	3.06961	1	0.951724	74.1915
GOTERM_BP_DIRECT	GO:0033962~cytoplasmic mRNA processing body assembly	5	0.205761	0.0692847	ENSG00000110367, ENSG00000166889, ENSG00000135870, ENSG00000197102, ENSG00000179151	2104	13	16792	3.06961	1	0.951724	74.1915
GOTERM_BP_DIRECT	GO:0001829~trophectodermal cell differentiation	5	0.205761	0.0692847	ENSG00000112658, ENSG00000198730, ENSG00000088038, ENSG00000111596, ENSG00000164442	2104	13	16792	3.06961	1	0.951724	74.1915
GOTERM_BP_DIRECT	GO:0048712~negative regulation of astrocyte differentiation	5	0.205761	0.0692847	ENSG00000066135, ENSG00000173406, ENSG00000141644, ENSG00000140538, ENSG00000134323	2104	13	16792	3.06961	1	0.951724	74.1915
GOTERM_BP_DIRECT	GO:0060996~dendritic spine development	5	0.205761	0.0692847	ENSG00000071051, ENSG00000049618, ENSG00000180370, ENSG00000154928, ENSG00000133216	2104	13	16792	3.06961	1	0.951724	74.1915
GOTERM_BP_DIRECT	GO:0048675~axon extension	7	0.288066	0.0706851	ENSG00000124486, ENSG00000196338, ENSG00000083290, ENSG00000077279, ENSG00000186868, ENSG00000173166, ENSG00000131711	2104	24	16792	2.32779	1	0.953405	74.9143
GOTERM_BP_DIRECT	GO:0045648~positive regulation of erythrocyte differentiation	7	0.288066	0.0706851	ENSG00000125686, ENSG00000135503, ENSG00000121989, ENSG00000115738, ENSG00000118689, ENSG00000122641, ENSG00000112305	2104	24	16792	2.32779	1	0.953405	74.9143
GOTERM_BP_DIRECT	GO:0009411~response to UV	10	0.411523	0.0722909	ENSG00000225830, ENSG00000158941, ENSG00000140464, ENSG00000107643, ENSG00000163945, ENSG00000130939, ENSG00000134899, ENSG00000135945, ENSG00000133895, ENSG00000011566	2104	42	16792	1.90024	1	0.955413	75.7195
GOTERM_BP_DIRECT	GO:0021510~spinal cord development	8	0.329218	0.0729524	ENSG00000184634, ENSG00000109917, ENSG00000124766, ENSG00000092964, ENSG00000185008, ENSG00000176887, ENSG00000145545, ENSG00000177732	2104	30	16792	2.12826	1	0.955482	76.044
GOTERM_BP_DIRECT	GO:0007052~mitotic spindle organization	8	0.329218	0.0729524	ENSG00000163539, ENSG00000066629, ENSG00000068796, ENSG00000173273, ENSG00000074054, ENSG00000101350, ENSG00000197102, ENSG00000145632	2104	30	16792	2.12826	1	0.955482	76.044
GOTERM_BP_DIRECT	GO:0030217~T cell differentiation	8	0.329218	0.0729524	ENSG00000175354, ENSG00000100105, ENSG00000160199, ENSG00000184916, ENSG00000124766, ENSG00000171608, ENSG00000157404, ENSG00000073861	2104	30	16792	2.12826	1	0.955482	76.044
GOTERM_BP_DIRECT	GO:0006611~protein export from nucleus	8	0.329218	0.0729524	ENSG00000082701, ENSG00000124571, ENSG00000204764, ENSG00000126883, ENSG00000169180, ENSG00000198742, ENSG00000047410, ENSG00000130227	2104	30	16792	2.12826	1	0.955482	76.044
GOTERM_BP_DIRECT	GO:0030177~positive regulation of Wnt signaling pathway	9	0.37037	0.0732231	ENSG00000127616, ENSG00000019995, ENSG00000101266, ENSG00000157933, ENSG00000124766, ENSG00000106723, ENSG00000127603, ENSG00000174804, ENSG00000165617	2104	36	16792	1.99525	1	0.95478	76.1756
GOTERM_BP_DIRECT	GO:0007030~Golgi organization	15	0.617284	0.0737021	ENSG00000141551, ENSG00000140859, ENSG00000196535, ENSG00000102606, ENSG00000163539, ENSG00000107862, ENSG00000074054, ENSG00000136152, ENSG00000066777, ENSG00000215114, ENSG00000066455, ENSG00000107863, ENSG00000180535, ENSG00000044090, ENSG00000148429	2104	74	16792	1.61777	1	0.954494	76.4068
GOTERM_BP_DIRECT	GO:0044331~cell-cell adhesion mediated by cadherin	3	0.123457	0.0791098	ENSG00000074276, ENSG00000125966, ENSG00000170558	2104	4	16792	5.98574	1	0.963017	78.8739
GOTERM_BP_DIRECT	GO:0006054~N-acetylneuraminate metabolic process	3	0.123457	0.0791098	ENSG00000073849, ENSG00000159921, ENSG00000008513	2104	4	16792	5.98574	1	0.963017	78.8739
GOTERM_BP_DIRECT	GO:0003338~metanephros morphogenesis	3	0.123457	0.0791098	ENSG00000188064, ENSG00000138759, ENSG00000070193	2104	4	16792	5.98574	1	0.963017	78.8739
GOTERM_BP_DIRECT	GO:0070213~protein auto-ADP-ribosylation	3	0.123457	0.0791098	ENSG00000173273, ENSG00000138617, ENSG00000107854	2104	4	16792	5.98574	1	0.963017	78.8739
GOTERM_BP_DIRECT	GO:0032210~regulation of telomere maintenance via telomerase	3	0.123457	0.0791098	ENSG00000070366, ENSG00000173273, ENSG00000132604	2104	4	16792	5.98574	1	0.963017	78.8739
GOTERM_BP_DIRECT	GO:0061470~T follicular helper cell differentiation	3	0.123457	0.0791098	ENSG00000056586, ENSG00000114861, ENSG00000135870	2104	4	16792	5.98574	1	0.963017	78.8739
GOTERM_BP_DIRECT	GO:0010626~negative regulation of Schwann cell proliferation	3	0.123457	0.0791098	ENSG00000100697, ENSG00000157933, ENSG00000022840	2104	4	16792	5.98574	1	0.963017	78.8739
GOTERM_BP_DIRECT	GO:2001168~positive regulation of histone H2B ubiquitination	3	0.123457	0.0791098	ENSG00000155827, ENSG00000103549, ENSG00000198730	2104	4	16792	5.98574	1	0.963017	78.8739
GOTERM_BP_DIRECT	GO:0021772~olfactory bulb development	6	0.246914	0.0794585	ENSG00000075213, ENSG00000157933, ENSG00000135049, ENSG00000099617, ENSG00000092964, ENSG00000115738	2104	19	16792	2.52031	1	0.962518	79.0243
GOTERM_BP_DIRECT	GO:0031290~retinal ganglion cell axon guidance	6	0.246914	0.0794585	ENSG00000135333, ENSG00000185008, ENSG00000154928, ENSG00000187122, ENSG00000133216, ENSG00000184349	2104	19	16792	2.52031	1	0.962518	79.0243
GOTERM_BP_DIRECT	GO:0016032~viral process	47	1.93416	0.0806029	ENSG00000131019, ENSG00000096063, ENSG00000066135, ENSG00000107862, ENSG00000138443, ENSG00000147133, ENSG00000089902, ENSG00000142453, ENSG00000132466, ENSG00000086102, ENSG00000175115, ENSG00000015171, ENSG00000109111, ENSG00000162231, ENSG00000124789, ENSG00000196313, ENSG00000044090, ENSG00000011275, ENSG00000114742, ENSG00000065526, ENSG00000126883, ENSG00000110169, ENSG00000141867, ENSG0000…	2104	299	16792	1.25454	1	0.963291	79.5108
GOTERM_BP_DIRECT	GO:0001578~microtubule bundle formation	7	0.288066	0.0835783	ENSG00000021574, ENSG00000130779, ENSG00000167566, ENSG00000134369, ENSG00000074054, ENSG00000007047, ENSG00000131711	2104	25	16792	2.23468	1	0.966731	80.7262
GOTERM_BP_DIRECT	GO:0007569~cell aging	7	0.288066	0.0835783	ENSG00000171791, ENSG00000070444, ENSG00000159256, ENSG00000213024, ENSG00000108175, ENSG00000096717, ENSG00000164442	2104	25	16792	2.23468	1	0.966731	80.7262
GOTERM_BP_DIRECT	GO:0030032~lamellipodium assembly	8	0.329218	0.0845045	ENSG00000139132, ENSG00000160293, ENSG00000071051, ENSG00000102606, ENSG00000115355, ENSG00000173210, ENSG00000157404, ENSG00000151490	2104	31	16792	2.05961	1	0.967078	81.0903
GOTERM_BP_DIRECT	GO:0034968~histone lysine methylation	5	0.205761	0.0877346	ENSG00000143379, ENSG00000204371, ENSG00000147548, ENSG00000133895, ENSG00000116731	2104	14	16792	2.85035	1	0.970421	82.31
GOTERM_BP_DIRECT	GO:0014912~negative regulation of smooth muscle cell migration	5	0.205761	0.0877346	ENSG00000123384, ENSG00000107779, ENSG00000173334, ENSG00000137872, ENSG00000115461	2104	14	16792	2.85035	1	0.970421	82.31
GOTERM_BP_DIRECT	GO:0060021~palate development	15	0.617284	0.0880166	ENSG00000019549, ENSG00000119042, ENSG00000138759, ENSG00000135414, ENSG00000183337, ENSG00000157933, ENSG00000154764, ENSG00000081189, ENSG00000107779, ENSG00000166206, ENSG00000115904, ENSG00000122641, ENSG00000092969, ENSG00000133216, ENSG00000197603	2104	76	16792	1.5752	1	0.969904	82.4129
GOTERM_BP_DIRECT	GO:0010506~regulation of autophagy	11	0.452675	0.0884545	ENSG00000143322, ENSG00000094631, ENSG00000097007, ENSG00000105647, ENSG00000214338, ENSG00000083290, ENSG00000186868, ENSG00000102043, ENSG00000196730, ENSG00000103194, ENSG00000149639	2104	50	16792	1.75582	1	0.969583	82.5715
GOTERM_BP_DIRECT	GO:0048103~somatic stem cell division	4	0.164609	0.0922595	ENSG00000162738, ENSG00000154764, ENSG00000157404, ENSG00000092969	2104	9	16792	3.54711	1	0.973239	83.8938
GOTERM_BP_DIRECT	GO:0032886~regulation of microtubule-based process	4	0.164609	0.0922595	ENSG00000082701, ENSG00000163539, ENSG00000212916, ENSG00000127603	2104	9	16792	3.54711	1	0.973239	83.8938
GOTERM_BP_DIRECT	GO:0021799~cerebral cortex radially oriented cell migration	4	0.164609	0.0922595	ENSG00000184486, ENSG00000198914, ENSG00000174013, ENSG00000150764	2104	9	16792	3.54711	1	0.973239	83.8938
GOTERM_BP_DIRECT	GO:0021612~facial nerve structural organization	4	0.164609	0.0922595	ENSG00000221866, ENSG00000130827, ENSG00000075213, ENSG00000001617	2104	9	16792	3.54711	1	0.973239	83.8938
GOTERM_BP_DIRECT	GO:0070198~protein localization to chromosome, telomeric region	4	0.164609	0.0922595	ENSG00000173273, ENSG00000132604, ENSG00000085224, ENSG00000107854	2104	9	16792	3.54711	1	0.973239	83.8938
GOTERM_BP_DIRECT	GO:0006265~DNA topological change	4	0.164609	0.0922595	ENSG00000177302, ENSG00000184428, ENSG00000198900, ENSG00000100038	2104	9	16792	3.54711	1	0.973239	83.8938
GOTERM_BP_DIRECT	GO:0034058~endosomal vesicle fusion	4	0.164609	0.0922595	ENSG00000166887, ENSG00000131381, ENSG00000185722, ENSG00000135966	2104	9	16792	3.54711	1	0.973239	83.8938
GOTERM_BP_DIRECT	GO:0042795~snRNA transcription from RNA polymerase II promoter	14	0.576132	0.092894	ENSG00000028277, ENSG00000165417, ENSG00000163125, ENSG00000164880, ENSG00000114503, ENSG00000125651, ENSG00000047315, ENSG00000149262, ENSG00000143493, ENSG00000165684, ENSG00000144161, ENSG00000164151, ENSG00000143624, ENSG00000164902	2104	70	16792	1.5962	1	0.973152	84.1049
GOTERM_BP_DIRECT	GO:0072583~clathrin-mediated endocytosis	6	0.246914	0.0954968	ENSG00000130475, ENSG00000130787, ENSG00000073921, ENSG00000137942, ENSG00000006125, ENSG00000157107	2104	20	16792	2.3943	1	0.975138	84.9436
GOTERM_BP_DIRECT	GO:0071375~cellular response to peptide hormone stimulus	6	0.246914	0.0954968	ENSG00000010810, ENSG00000103653, ENSG00000197122, ENSG00000125952, ENSG00000133895, ENSG00000173039	2104	20	16792	2.3943	1	0.975138	84.9436
GOTERM_BP_DIRECT	GO:0017015~regulation of transforming growth factor beta receptor signaling pathway	6	0.246914	0.0954968	ENSG00000197323, ENSG00000108854, ENSG00000116128, ENSG00000183779, ENSG00000134986, ENSG00000176887	2104	20	16792	2.3943	1	0.975138	84.9436
GOTERM_BP_DIRECT	GO:0043153~entrainment of circadian clock by photoperiod	6	0.246914	0.0954968	ENSG00000142178, ENSG00000140464, ENSG00000182979, ENSG00000173914, ENSG00000115738, ENSG00000008405	2104	20	16792	2.3943	1	0.975138	84.9436
GOTERM_BP_DIRECT	GO:0060828~regulation of canonical Wnt signaling pathway	6	0.246914	0.0954968	ENSG00000183779, ENSG00000178171, ENSG00000183762, ENSG00000169862, ENSG00000088448, ENSG00000184675	2104	20	16792	2.3943	1	0.975138	84.9436
GOTERM_BP_DIRECT	GO:0001974~blood vessel remodeling	8	0.329218	0.0970379	ENSG00000168214, ENSG00000075223, ENSG00000165240, ENSG00000128342, ENSG00000204217, ENSG00000081189, ENSG00000070193, ENSG00000092969	2104	32	16792	1.99525	1	0.975943	85.4202
GOTERM_BP_DIRECT	GO:0007626~locomotory behavior	16	0.658436	0.0980926	ENSG00000101204, ENSG00000188710, ENSG00000171587, ENSG00000169057, ENSG00000113262, ENSG00000117971, ENSG00000105088, ENSG00000153266, ENSG00000165240, ENSG00000166833, ENSG00000139910, ENSG00000148408, ENSG00000168959, ENSG00000112320, ENSG00000164128, ENSG00000101349	2104	84	16792	1.52019	1	0.976254	85.7381

## Sheet: Top-2515 GO
Category	Term	Count	%	PValue	Genes	List Total	Pop Hits	Pop Total	Fold Enrichment	Bonferroni	Benjamini	FDR
GOTERM_BP_DIRECT	GO:0006351~transcription, DNA-templated	546	22.1142	5.0986e-78	ENSG00000215301, ENSG00000167981, ENSG00000099381, ENSG00000151445, ENSG00000109118, ENSG00000159692, ENSG00000121417, ENSG00000197951, ENSG00000176896, ENSG00000204524, ENSG00000185219, ENSG00000109111, ENSG00000198911, ENSG00000184939, ENSG00000109787, ENSG00000136870, ENSG00000141646, ENSG00000197857, ENSG00000204366, ENSG00000141456, ENSG00000119685, ENSG00000109381, ENSG00000196597, ENSG0000…	2203	1955	16792	2.12879	2.24389e-74	2.24389e-74	9.57257e-75
GOTERM_BP_DIRECT	GO:0006355~regulation of transcription, DNA-templated	432	17.497	7.36692e-64	ENSG00000167981, ENSG00000099381, ENSG00000151445, ENSG00000121417, ENSG00000197951, ENSG00000185219, ENSG00000204524, ENSG00000109111, ENSG00000184939, ENSG00000109787, ENSG00000136870, ENSG00000141646, ENSG00000197857, ENSG00000009307, ENSG00000204366, ENSG00000130382, ENSG00000196597, ENSG00000166704, ENSG00000110851, ENSG00000121406, ENSG00000196152, ENSG00000197016, ENSG00000054267, ENSG0000…	2203	1504	16792	2.18939	3.24218e-60	1.62109e-60	1.38313e-60
GOTERM_BP_DIRECT	GO:0042787~protein ubiquitination involved in ubiquitin-dependent protein catabolic process	58	2.34913	3.28611e-14	ENSG00000139842, ENSG00000108854, ENSG00000128731, ENSG00000086758, ENSG00000148634, ENSG00000153827, ENSG00000145860, ENSG00000166233, ENSG00000167986, ENSG00000198373, ENSG00000135506, ENSG00000178502, ENSG00000165338, ENSG00000110395, ENSG00000094880, ENSG00000183655, ENSG00000119682, ENSG00000036257, ENSG00000174010, ENSG00000174013, ENSG00000196510, ENSG00000049759, ENSG00000076321, ENSG0000…	2203	153	16792	2.88951	1.44628e-10	4.82094e-11	6.16951e-11
GOTERM_BP_DIRECT	GO:0016569~covalent chromatin modification	48	1.94411	4.86825e-14	ENSG00000127616, ENSG00000102974, ENSG00000071794, ENSG00000066117, ENSG00000028310, ENSG00000139613, ENSG00000141027, ENSG00000085224, ENSG00000100888, ENSG00000189079, ENSG00000124177, ENSG00000169925, ENSG00000184402, ENSG00000015171, ENSG00000102038, ENSG00000130726, ENSG00000085185, ENSG00000103479, ENSG00000011258, ENSG00000168283, ENSG00000140382, ENSG00000131845, ENSG00000099956, ENSG0000…	2203	113	16792	3.23781	2.14011e-10	5.35028e-11	9.12936e-11
GOTERM_BP_DIRECT	GO:0006397~mRNA processing	62	2.51114	4.30299e-13	ENSG00000120948, ENSG00000096063, ENSG00000100109, ENSG00000064607, ENSG00000182872, ENSG00000100722, ENSG00000177733, ENSG00000111605, ENSG00000125944, ENSG00000070047, ENSG00000213782, ENSG00000109111, ENSG00000106344, ENSG00000088930, ENSG00000048740, ENSG00000213079, ENSG00000100813, ENSG00000139767, ENSG00000133226, ENSG00000149187, ENSG00000138767, ENSG00000164329, ENSG00000136709, ENSG0000…	2203	179	16792	2.64014	1.89385e-09	3.7877e-10	8.07931e-10
GOTERM_BP_DIRECT	GO:0000398~mRNA splicing, via spliceosome	69	2.79465	5.90895e-12	ENSG00000112739, ENSG00000204560, ENSG00000100109, ENSG00000140829, ENSG00000164663, ENSG00000114503, ENSG00000145216, ENSG00000177733, ENSG00000144028, ENSG00000125944, ENSG00000082516, ENSG00000121390, ENSG00000136875, ENSG00000021776, ENSG00000136937, ENSG00000066044, ENSG00000065526, ENSG00000133226, ENSG00000149532, ENSG00000090060, ENSG00000145833, ENSG00000086589, ENSG00000125651, ENSG0000…	2203	222	16792	2.3691	2.60052e-08	4.33421e-09	1.1094e-08
GOTERM_BP_DIRECT	GO:0016032~viral process	82	3.32118	6.5201e-11	ENSG00000096063, ENSG00000139842, ENSG00000107862, ENSG00000118260, ENSG00000138443, ENSG00000062650, ENSG00000112592, ENSG00000132466, ENSG00000177885, ENSG00000081026, ENSG00000086102, ENSG00000175115, ENSG00000167986, ENSG00000058804, ENSG00000109111, ENSG00000124789, ENSG00000114742, ENSG00000120253, ENSG00000114062, ENSG00000095319, ENSG00000111880, ENSG00000065526, ENSG00000126883, ENSG0000…	2203	299	16792	2.09041	2.86949e-07	4.09928e-08	1.22414e-07
GOTERM_BP_DIRECT	GO:0006396~RNA processing	39	1.57959	1.08036e-10	ENSG00000005100, ENSG00000105323, ENSG00000100109, ENSG00000064607, ENSG00000132153, ENSG00000100697, ENSG00000067248, ENSG00000100201, ENSG00000083635, ENSG00000153187, ENSG00000150990, ENSG00000107290, ENSG00000090621, ENSG00000101343, ENSG00000101452, ENSG00000085872, ENSG00000163214, ENSG00000136875, ENSG00000162374, ENSG00000160710, ENSG00000101138, ENSG00000047188, ENSG00000088930, ENSG0000…	2203	97	16792	3.06465	4.75465e-07	5.94332e-08	2.02836e-07
GOTERM_BP_DIRECT	GO:0016567~protein ubiquitination	90	3.6452	1.11576e-09	ENSG00000197323, ENSG00000154710, ENSG00000197429, ENSG00000105879, ENSG00000165572, ENSG00000130338, ENSG00000101966, ENSG00000159459, ENSG00000128731, ENSG00000135686, ENSG00000166233, ENSG00000122741, ENSG00000166439, ENSG00000172175, ENSG00000114648, ENSG00000042429, ENSG00000198373, ENSG00000110042, ENSG00000135506, ENSG00000063978, ENSG00000130726, ENSG00000131653, ENSG00000118496, ENSG0000…	2203	359	16792	1.91089	4.91047e-06	5.45609e-07	2.09484e-06
GOTERM_BP_DIRECT	GO:0006406~mRNA export from nucleus	38	1.53908	1.26729e-09	ENSG00000116698, ENSG00000205937, ENSG00000119392, ENSG00000116350, ENSG00000100227, ENSG00000151461, ENSG00000140829, ENSG00000110713, ENSG00000005007, ENSG00000114503, ENSG00000145216, ENSG00000163950, ENSG00000113569, ENSG00000058804, ENSG00000063244, ENSG00000157106, ENSG00000162231, ENSG00000139496, ENSG00000124789, ENSG00000196313, ENSG00000136937, ENSG00000122068, ENSG00000120253, ENSG0000…	2203	100	16792	2.89649	5.57735e-06	5.57736e-07	2.37933e-06
GOTERM_BP_DIRECT	GO:0000209~protein polyubiquitination	55	2.22762	4.80081e-09	ENSG00000056586, ENSG00000095261, ENSG00000154359, ENSG00000198060, ENSG00000108854, ENSG00000071794, ENSG00000086758, ENSG00000153827, ENSG00000145860, ENSG00000166233, ENSG00000173273, ENSG00000068878, ENSG00000141279, ENSG00000165338, ENSG00000133606, ENSG00000131263, ENSG00000155827, ENSG00000036257, ENSG00000108671, ENSG00000175104, ENSG00000110429, ENSG00000134900, ENSG00000197579, ENSG0000…	2203	184	16792	2.27841	2.11281e-05	1.92076e-06	9.01347e-06
GOTERM_BP_DIRECT	GO:1901796~regulation of signal transduction by p53 class mediator	42	1.70109	7.92716e-09	ENSG00000122728, ENSG00000163781, ENSG00000152409, ENSG00000188976, ENSG00000083168, ENSG00000147133, ENSG00000149136, ENSG00000112592, ENSG00000149480, ENSG00000092201, ENSG00000111642, ENSG00000101266, ENSG00000140464, ENSG00000111725, ENSG00000112062, ENSG00000165392, ENSG00000070770, ENSG00000064313, ENSG00000176749, ENSG00000135679, ENSG00000204371, ENSG00000113456, ENSG00000089022, ENSG0000…	2203	124	16792	2.58176	3.48868e-05	2.90728e-06	1.48832e-05
GOTERM_BP_DIRECT	GO:0016925~protein sumoylation	40	1.62009	1.41355e-08	ENSG00000105229, ENSG00000128731, ENSG00000118007, ENSG00000110713, ENSG00000113569, ENSG00000067369, ENSG00000058804, ENSG00000143799, ENSG00000140464, ENSG00000130726, ENSG00000139496, ENSG00000078043, ENSG00000124789, ENSG00000196313, ENSG00000165392, ENSG00000168283, ENSG00000120253, ENSG00000163961, ENSG00000095319, ENSG00000112200, ENSG00000033800, ENSG00000135679, ENSG00000139372, ENSG0000…	2203	117	16792	2.60593	6.22085e-05	4.78541e-06	2.65393e-05
GOTERM_BP_DIRECT	GO:0006511~ubiquitin-dependent protein catabolic process	53	2.14662	2.48592e-08	ENSG00000170242, ENSG00000139842, ENSG00000108854, ENSG00000184787, ENSG00000135913, ENSG00000106346, ENSG00000164663, ENSG00000166233, ENSG00000186591, ENSG00000170185, ENSG00000094880, ENSG00000131263, ENSG00000155827, ENSG00000114062, ENSG00000103275, ENSG00000036257, ENSG00000114316, ENSG00000182670, ENSG00000108671, ENSG00000143258, ENSG00000172046, ENSG00000058056, ENSG00000197579, ENSG0000…	2203	182	16792	2.21969	0.0001094	7.81465e-06	4.6673e-05
GOTERM_BP_DIRECT	GO:0008380~RNA splicing	49	1.98461	5.63557e-08	ENSG00000120948, ENSG00000112739, ENSG00000096063, ENSG00000204560, ENSG00000100109, ENSG00000064607, ENSG00000116679, ENSG00000182872, ENSG00000114503, ENSG00000213782, ENSG00000109111, ENSG00000106344, ENSG00000136875, ENSG00000136937, ENSG00000213079, ENSG00000100813, ENSG00000139767, ENSG00000133226, ENSG00000158941, ENSG00000164944, ENSG00000147140, ENSG00000205937, ENSG00000143368, ENSG0000…	2203	166	16792	2.24997	0.00024799	1.65346e-05	0.000105807
GOTERM_BP_DIRECT	GO:0006357~regulation of transcription from RNA polymerase II promoter	99	4.00972	6.83185e-08	ENSG00000180182, ENSG00000032219, ENSG00000071794, ENSG00000176896, ENSG00000154957, ENSG00000118689, ENSG00000135164, ENSG00000112062, ENSG00000181827, ENSG00000198146, ENSG00000109381, ENSG00000138375, ENSG00000099956, ENSG00000083814, ENSG00000123066, ENSG00000124831, ENSG00000132740, ENSG00000054267, ENSG00000096401, ENSG00000170004, ENSG00000100603, ENSG00000213676, ENSG00000115966, ENSG0000…	2203	441	16792	1.71114	0.000300624	1.87917e-05	0.000128267
GOTERM_BP_DIRECT	GO:0043161~proteasome-mediated ubiquitin-dependent protein catabolic process	56	2.26812	7.34022e-08	ENSG00000095261, ENSG00000139842, ENSG00000119318, ENSG00000145860, ENSG00000103126, ENSG00000167986, ENSG00000186591, ENSG00000198373, ENSG00000140464, ENSG00000107341, ENSG00000063978, ENSG00000068878, ENSG00000178502, ENSG00000215114, ENSG00000094880, ENSG00000131263, ENSG00000036257, ENSG00000174013, ENSG00000108671, ENSG00000116406, ENSG00000184675, ENSG00000196510, ENSG00000185104, ENSG0000…	2203	203	16792	2.10271	0.000322991	1.90024e-05	0.000137812
GOTERM_BP_DIRECT	GO:0043984~histone H4-K16 acetylation	14	0.567031	1.03416e-07	ENSG00000139620, ENSG00000174579, ENSG00000147162, ENSG00000120071, ENSG00000118058, ENSG00000114982, ENSG00000144445, ENSG00000188895, ENSG00000102221, ENSG00000077684, ENSG00000025293, ENSG00000172534, ENSG00000163875, ENSG00000196363	2203	20	16792	5.33563	0.000455029	2.52848e-05	0.000194162
GOTERM_BP_DIRECT	GO:0045892~negative regulation of transcription, DNA-templated	106	4.29324	4.12915e-07	ENSG00000146587, ENSG00000197323, ENSG00000032219, ENSG00000108854, ENSG00000196724, ENSG00000109118, ENSG00000159692, ENSG00000173039, ENSG00000177311, ENSG00000101158, ENSG00000078699, ENSG00000140464, ENSG00000130726, ENSG00000121390, ENSG00000141644, ENSG00000141646, ENSG00000111707, ENSG00000109381, ENSG00000117139, ENSG00000124831, ENSG00000095564, ENSG00000120616, ENSG00000133895, ENSG0000…	2203	499	16792	1.61917	0.00181559	9.56396e-05	0.000775241
GOTERM_BP_DIRECT	GO:0006409~tRNA export from nucleus	17	0.688538	5.44464e-07	ENSG00000120253, ENSG00000095319, ENSG00000126883, ENSG00000093000, ENSG00000047410, ENSG00000110713, ENSG00000113569, ENSG00000058804, ENSG00000030066, ENSG00000165271, ENSG00000101146, ENSG00000139496, ENSG00000124789, ENSG00000196313, ENSG00000213024, ENSG00000069248, ENSG00000153201	2203	32	16792	4.04936	0.00239332	0.000119802	0.00102222
GOTERM_BP_DIRECT	GO:0075733~intracellular transport of virus	22	0.891049	5.95574e-07	ENSG00000120253, ENSG00000095319, ENSG00000108424, ENSG00000126883, ENSG00000186432, ENSG00000093000, ENSG00000114030, ENSG00000047410, ENSG00000110713, ENSG00000113569, ENSG00000058804, ENSG00000152465, ENSG00000030066, ENSG00000101146, ENSG00000155975, ENSG00000139496, ENSG00000124789, ENSG00000196313, ENSG00000213024, ENSG00000069248, ENSG00000102753, ENSG00000153201	2203	51	16792	3.28807	0.00261769	0.000124807	0.00111818
GOTERM_BP_DIRECT	GO:0006281~DNA repair	59	2.38963	1.00896e-06	ENSG00000128908, ENSG00000163781, ENSG00000114933, ENSG00000153827, ENSG00000005007, ENSG00000085224, ENSG00000167986, ENSG00000172273, ENSG00000143799, ENSG00000083642, ENSG00000135999, ENSG00000130726, ENSG00000068878, ENSG00000198793, ENSG00000143624, ENSG00000038219, ENSG00000185515, ENSG00000182150, ENSG00000139372, ENSG00000099956, ENSG00000113456, ENSG00000113812, ENSG00000132740, ENSG0000…	2203	235	16792	1.91369	0.00443059	0.000201817	0.00189429
GOTERM_BP_DIRECT	GO:0006974~cellular response to DNA damage stimulus	54	2.18712	1.02978e-06	ENSG00000163781, ENSG00000170242, ENSG00000139842, ENSG00000101966, ENSG00000128731, ENSG00000153827, ENSG00000166439, ENSG00000177311, ENSG00000143799, ENSG00000068878, ENSG00000143624, ENSG00000134452, ENSG00000110395, ENSG00000137760, ENSG00000038219, ENSG00000138375, ENSG00000009954, ENSG00000168564, ENSG00000113456, ENSG00000174013, ENSG00000184677, ENSG00000090061, ENSG00000133895, ENSG0000…	2203	208	16792	1.97887	0.0045218	0.000197026	0.00193338
GOTERM_BP_DIRECT	GO:0006468~protein phosphorylation	97	3.92872	1.25813e-06	ENSG00000112739, ENSG00000096063, ENSG00000154310, ENSG00000183496, ENSG00000078142, ENSG00000163788, ENSG00000176444, ENSG00000159692, ENSG00000136021, ENSG00000101266, ENSG00000159899, ENSG00000198793, ENSG00000073803, ENSG00000188322, ENSG00000082258, ENSG00000115216, ENSG00000145348, ENSG00000115687, ENSG00000146872, ENSG00000114904, ENSG00000131023, ENSG00000113712, ENSG00000180370, ENSG0000…	2203	456	16792	1.62142	0.00552174	0.000230683	0.0023621
GOTERM_BP_DIRECT	GO:0006606~protein import into nucleus	23	0.931551	1.71254e-06	ENSG00000198700, ENSG00000095319, ENSG00000108424, ENSG00000126883, ENSG00000153487, ENSG00000093000, ENSG00000205339, ENSG00000114030, ENSG00000047410, ENSG00000113569, ENSG00000160294, ENSG00000155393, ENSG00000101146, ENSG00000103197, ENSG00000139496, ENSG00000124789, ENSG00000160710, ENSG00000196313, ENSG00000204569, ENSG00000025800, ENSG00000213024, ENSG00000069248, ENSG00000102753	2203	58	16792	3.02265	0.00750855	0.00030143	0.00321522
GOTERM_BP_DIRECT	GO:0006368~transcription elongation from RNA polymerase II promoter	29	1.17456	2.54417e-06	ENSG00000122728, ENSG00000111358, ENSG00000134014, ENSG00000149136, ENSG00000147133, ENSG00000163161, ENSG00000011007, ENSG00000112592, ENSG00000114503, ENSG00000092201, ENSG00000101158, ENSG00000070061, ENSG00000196235, ENSG00000136937, ENSG00000166477, ENSG00000064313, ENSG00000060069, ENSG00000144231, ENSG00000165417, ENSG00000082258, ENSG00000125651, ENSG00000090061, ENSG00000181555, ENSG0000…	2203	86	16792	2.57032	0.0111344	0.000430557	0.00477654
GOTERM_BP_DIRECT	GO:0000122~negative regulation of transcription from RNA polymerase II promoter	138	5.58931	3.09552e-06	ENSG00000197323, ENSG00000108854, ENSG00000182872, ENSG00000113649, ENSG00000109118, ENSG00000159692, ENSG00000173039, ENSG00000163602, ENSG00000086102, ENSG00000127511, ENSG00000130726, ENSG00000184939, ENSG00000198911, ENSG00000141644, ENSG00000118689, ENSG00000136870, ENSG00000178397, ENSG00000141646, ENSG00000135365, ENSG00000111707, ENSG00000168283, ENSG00000163320, ENSG00000139372, ENSG0000…	2203	720	16792	1.46095	0.013531	0.000504444	0.00581166
GOTERM_BP_DIRECT	GO:0006306~DNA methylation	14	0.567031	3.65327e-06	ENSG00000102974, ENSG00000178409, ENSG00000118058, ENSG00000076108, ENSG00000204371, ENSG00000149480, ENSG00000085224, ENSG00000167491, ENSG00000005483, ENSG00000171681, ENSG00000130816, ENSG00000181090, ENSG00000119772, ENSG00000143614	2203	25	16792	4.26851	0.0159495	0.000574052	0.00685875
GOTERM_BP_DIRECT	GO:0043982~histone H4-K8 acetylation	11	0.445525	5.55304e-06	ENSG00000139620, ENSG00000147162, ENSG00000102221, ENSG00000120071, ENSG00000077684, ENSG00000025293, ENSG00000114982, ENSG00000172534, ENSG00000163875, ENSG00000196363, ENSG00000144445	2203	16	16792	5.24035	0.0241428	0.000842369	0.0104253
GOTERM_BP_DIRECT	GO:0043981~histone H4-K5 acetylation	11	0.445525	5.55304e-06	ENSG00000139620, ENSG00000147162, ENSG00000102221, ENSG00000120071, ENSG00000077684, ENSG00000025293, ENSG00000114982, ENSG00000172534, ENSG00000163875, ENSG00000196363, ENSG00000144445	2203	16	16792	5.24035	0.0241428	0.000842369	0.0104253
GOTERM_BP_DIRECT	GO:0010827~regulation of glucose transport	16	0.648036	5.61722e-06	ENSG00000120253, ENSG00000095319, ENSG00000126883, ENSG00000093000, ENSG00000047410, ENSG00000110713, ENSG00000113569, ENSG00000058804, ENSG00000030066, ENSG00000101146, ENSG00000139496, ENSG00000124789, ENSG00000196313, ENSG00000213024, ENSG00000069248, ENSG00000153201	2203	33	16792	3.69568	0.0244184	0.000823709	0.0105458
GOTERM_BP_DIRECT	GO:0006886~intracellular protein transport	57	2.30863	5.61863e-06	ENSG00000115145, ENSG00000215305, ENSG00000158623, ENSG00000128731, ENSG00000151445, ENSG00000242247, ENSG00000157538, ENSG00000136738, ENSG00000107036, ENSG00000169221, ENSG00000011454, ENSG00000196497, ENSG00000113615, ENSG00000198863, ENSG00000108424, ENSG00000185009, ENSG00000145348, ENSG00000111490, ENSG00000166747, ENSG00000151458, ENSG00000081014, ENSG00000072958, ENSG00000116584, ENSG0000…	2203	236	16792	1.84099	0.0244245	0.000797349	0.0105484
GOTERM_BP_DIRECT	GO:0006607~NLS-bearing protein import into nucleus	13	0.526529	8.34866e-06	ENSG00000196497, ENSG00000105576, ENSG00000142599, ENSG00000108424, ENSG00000186432, ENSG00000083312, ENSG00000173402, ENSG00000114030, ENSG00000025800, ENSG00000153201, ENSG00000102753, ENSG00000137040, ENSG00000065150	2203	23	16792	4.30828	0.0360758	0.00114755	0.0156734
GOTERM_BP_DIRECT	GO:0016573~histone acetylation	16	0.648036	8.83594e-06	ENSG00000122728, ENSG00000140396, ENSG00000173011, ENSG00000169057, ENSG00000083168, ENSG00000147133, ENSG00000005339, ENSG00000124151, ENSG00000196367, ENSG00000156650, ENSG00000125484, ENSG00000135999, ENSG00000115966, ENSG00000080603, ENSG00000148835, ENSG00000163875	2203	34	16792	3.58698	0.0381407	0.0011777	0.0165881
GOTERM_BP_DIRECT	GO:0051568~histone H3-K4 methylation	12	0.486027	1.03363e-05	ENSG00000117222, ENSG00000118058, ENSG00000099381, ENSG00000167548, ENSG00000139718, ENSG00000055609, ENSG00000129691, ENSG00000116539, ENSG00000005483, ENSG00000147050, ENSG00000164091, ENSG00000196363	2203	20	16792	4.5734	0.0444712	0.00133706	0.0194046
GOTERM_BP_DIRECT	GO:0015031~protein transport	83	3.36168	1.27407e-05	ENSG00000172661, ENSG00000107862, ENSG00000168172, ENSG00000119392, ENSG00000085365, ENSG00000119396, ENSG00000077044, ENSG00000138246, ENSG00000129472, ENSG00000058804, ENSG00000151779, ENSG00000196814, ENSG00000103061, ENSG00000173273, ENSG00000106636, ENSG00000143952, ENSG00000196497, ENSG00000116903, ENSG00000114988, ENSG00000120253, ENSG00000111224, ENSG00000184178, ENSG00000031823, ENSG0000…	2203	395	16792	1.60165	0.0545289	0.00160077	0.0239178
GOTERM_BP_DIRECT	GO:0042795~snRNA transcription from RNA polymerase II promoter	24	0.972053	1.65353e-05	ENSG00000082258, ENSG00000144231, ENSG00000165417, ENSG00000163125, ENSG00000164880, ENSG00000112592, ENSG00000164975, ENSG00000114503, ENSG00000125651, ENSG00000090061, ENSG00000104299, ENSG00000047315, ENSG00000149262, ENSG00000143493, ENSG00000102786, ENSG00000129315, ENSG00000144161, ENSG00000101413, ENSG00000108506, ENSG00000164151, ENSG00000148835, ENSG00000143624, ENSG00000136937, ENSG0000…	2203	70	16792	2.61337	0.0701877	0.00201942	0.0310403
GOTERM_BP_DIRECT	GO:0031047~gene silencing by RNA	32	1.29607	2.57763e-05	ENSG00000113360, ENSG00000100697, ENSG00000123908, ENSG00000110713, ENSG00000114503, ENSG00000113569, ENSG00000058804, ENSG00000211460, ENSG00000139496, ENSG00000124789, ENSG00000196313, ENSG00000136937, ENSG00000120253, ENSG00000124571, ENSG00000095319, ENSG00000144231, ENSG00000090905, ENSG00000126883, ENSG00000093000, ENSG00000047410, ENSG00000138767, ENSG00000197157, ENSG00000144580, ENSG0000…	2203	111	16792	2.19743	0.107245	0.00306133	0.0483837
GOTERM_BP_DIRECT	GO:0016055~Wnt signaling pathway	46	1.8631	3.1093e-05	ENSG00000198728, ENSG00000105229, ENSG00000215301, ENSG00000154310, ENSG00000072803, ENSG00000101966, ENSG00000169118, ENSG00000070018, ENSG00000198873, ENSG00000103126, ENSG00000140332, ENSG00000198561, ENSG00000167986, ENSG00000114019, ENSG00000101266, ENSG00000198730, ENSG00000173273, ENSG00000166025, ENSG00000151292, ENSG00000116141, ENSG00000171016, ENSG00000213923, ENSG00000166477, ENSG0000…	2203	187	16792	1.87501	0.127892	0.00359464	0.0583607
GOTERM_BP_DIRECT	GO:1900034~regulation of cellular response to heat	24	0.972053	5.70116e-05	ENSG00000120253, ENSG00000095319, ENSG00000126883, ENSG00000093000, ENSG00000005339, ENSG00000047410, ENSG00000110713, ENSG00000096717, ENSG00000113569, ENSG00000058804, ENSG00000082701, ENSG00000166170, ENSG00000158941, ENSG00000030066, ENSG00000149311, ENSG00000101146, ENSG00000141564, ENSG00000139496, ENSG00000198793, ENSG00000124789, ENSG00000196313, ENSG00000213024, ENSG00000069248, ENSG0000…	2203	75	16792	2.43915	0.221912	0.00641307	0.106984
GOTERM_BP_DIRECT	GO:0000059~protein import into nucleus, docking	7	0.283516	0.000111612	ENSG00000196497, ENSG00000105576, ENSG00000108424, ENSG00000083312, ENSG00000110713, ENSG00000137040, ENSG00000065150	2203	8	16792	6.66954	0.388128	0.0122057	0.209343
GOTERM_BP_DIRECT	GO:0006383~transcription from RNA polymerase III promoter	14	0.567031	0.000145146	ENSG00000058600, ENSG00000185024, ENSG00000116679, ENSG00000148308, ENSG00000112592, ENSG00000115207, ENSG00000164975, ENSG00000186141, ENSG00000168495, ENSG00000148606, ENSG00000077235, ENSG00000241258, ENSG00000125484, ENSG00000013503	2203	33	16792	3.23372	0.472092	0.0154605	0.272159
GOTERM_BP_DIRECT	GO:0022604~regulation of cell morphogenesis	12	0.486027	0.000146097	ENSG00000186174, ENSG00000161813, ENSG00000019995, ENSG00000176293, ENSG00000130559, ENSG00000134698, ENSG00000147130, ENSG00000198218, ENSG00000146463, ENSG00000121741, ENSG00000165650, ENSG00000143093	2203	25	16792	3.65872	0.474298	0.0151934	0.27394
GOTERM_BP_DIRECT	GO:0016575~histone deacetylation	17	0.688538	0.000147121	ENSG00000111707, ENSG00000032219, ENSG00000076108, ENSG00000004487, ENSG00000149480, ENSG00000068024, ENSG00000054267, ENSG00000177565, ENSG00000096717, ENSG00000111642, ENSG00000094631, ENSG00000170004, ENSG00000169375, ENSG00000182979, ENSG00000127511, ENSG00000239306, ENSG00000135365	2203	46	16792	2.81695	0.476662	0.014946	0.275858
GOTERM_BP_DIRECT	GO:0046777~protein autophosphorylation	41	1.66059	0.000183275	ENSG00000171105, ENSG00000103653, ENSG00000198909, ENSG00000183496, ENSG00000154310, ENSG00000097007, ENSG00000147133, ENSG00000176444, ENSG00000197122, ENSG00000198873, ENSG00000154928, ENSG00000151422, ENSG00000206203, ENSG00000157106, ENSG00000140992, ENSG00000135503, ENSG00000130726, ENSG00000092439, ENSG00000165238, ENSG00000198793, ENSG00000140443, ENSG00000096968, ENSG00000073803, ENSG0000…	2203	172	16792	1.81695	0.553656	0.0181663	0.343537
GOTERM_BP_DIRECT	GO:0006338~chromatin remodeling	25	1.01256	0.000205229	ENSG00000128908, ENSG00000127616, ENSG00000173011, ENSG00000066117, ENSG00000076108, ENSG00000139613, ENSG00000085224, ENSG00000102038, ENSG00000125482, ENSG00000109111, ENSG00000196235, ENSG00000099956, ENSG00000153922, ENSG00000113812, ENSG00000141867, ENSG00000117713, ENSG00000068024, ENSG00000048649, ENSG00000142599, ENSG00000163939, ENSG00000049618, ENSG00000163104, ENSG00000204209, ENSG0000…	2203	86	16792	2.21579	0.594772	0.0198733	0.384613
GOTERM_BP_DIRECT	GO:0080182~histone H3-K4 trimethylation	9	0.36452	0.000235469	ENSG00000032219, ENSG00000178409, ENSG00000147162, ENSG00000168769, ENSG00000118058, ENSG00000198730, ENSG00000187605, ENSG00000137815, ENSG00000164091	2203	15	16792	4.5734	0.645278	0.022279	0.441167
GOTERM_BP_DIRECT	GO:0010501~RNA secondary structure unwinding	16	0.648036	0.000303114	ENSG00000165732, ENSG00000198231, ENSG00000215301, ENSG00000168872, ENSG00000123908, ENSG00000100201, ENSG00000125485, ENSG00000134698, ENSG00000157349, ENSG00000145833, ENSG00000110367, ENSG00000174243, ENSG00000213782, ENSG00000064703, ENSG00000088205, ENSG00000174953	2203	44	16792	2.77176	0.736633	0.0279882	0.567563
GOTERM_BP_DIRECT	GO:0007077~mitotic nuclear envelope disassembly	16	0.648036	0.000303114	ENSG00000120253, ENSG00000095319, ENSG00000126883, ENSG00000093000, ENSG00000047410, ENSG00000110713, ENSG00000113569, ENSG00000058804, ENSG00000030066, ENSG00000101146, ENSG00000139496, ENSG00000124789, ENSG00000196313, ENSG00000213024, ENSG00000069248, ENSG00000153201	2203	44	16792	2.77176	0.736633	0.0279882	0.567563
GOTERM_BP_DIRECT	GO:0045893~positive regulation of transcription, DNA-templated	95	3.84771	0.000481622	ENSG00000180182, ENSG00000127616, ENSG00000179833, ENSG00000141040, ENSG00000118260, ENSG00000189298, ENSG00000073921, ENSG00000118263, ENSG00000108557, ENSG00000112592, ENSG00000124151, ENSG00000103126, ENSG00000005483, ENSG00000042429, ENSG00000173039, ENSG00000184402, ENSG00000162714, ENSG00000172273, ENSG00000102038, ENSG00000063978, ENSG00000130726, ENSG00000078043, ENSG00000184939, ENSG0000…	2203	515	16792	1.40606	0.879984	0.0432081	0.900381
GOTERM_BP_DIRECT	GO:0090503~RNA phosphodiester bond hydrolysis, exonucleolytic	12	0.486027	0.000483188	ENSG00000174840, ENSG00000172795, ENSG00000143319, ENSG00000152520, ENSG00000083520, ENSG00000155508, ENSG00000125107, ENSG00000138767, ENSG00000088930, ENSG00000111596, ENSG00000113300, ENSG00000144535	2203	28	16792	3.26671	0.880809	0.04248	0.903296
GOTERM_BP_DIRECT	GO:0070936~protein K48-linked ubiquitination	16	0.648036	0.000675513	ENSG00000114062, ENSG00000186187, ENSG00000184787, ENSG00000182670, ENSG00000177479, ENSG00000186591, ENSG00000197579, ENSG00000049759, ENSG00000170633, ENSG00000107341, ENSG00000063978, ENSG00000132388, ENSG00000118518, ENSG00000011275, ENSG00000103429, ENSG00000145495	2203	47	16792	2.59484	0.948898	0.0577444	1.26068
GOTERM_BP_DIRECT	GO:0043966~histone H3 acetylation	15	0.607533	0.000809335	ENSG00000134014, ENSG00000083168, ENSG00000152382, ENSG00000149474, ENSG00000135801, ENSG00000156983, ENSG00000100425, ENSG00000102221, ENSG00000077684, ENSG00000156650, ENSG00000136715, ENSG00000135341, ENSG00000163872, ENSG00000096070, ENSG00000196363	2203	43	16792	2.65895	0.971656	0.0674841	1.50864
GOTERM_BP_DIRECT	GO:0017148~negative regulation of translation	18	0.72904	0.000910912	ENSG00000215301, ENSG00000129351, ENSG00000136628, ENSG00000149187, ENSG00000184708, ENSG00000196730, ENSG00000135930, ENSG00000144580, ENSG00000172071, ENSG00000204120, ENSG00000135387, ENSG00000165699, ENSG00000173933, ENSG00000088038, ENSG00000125107, ENSG00000136381, ENSG00000129245, ENSG00000111596	2203	58	16792	2.36555	0.98188	0.0742304	1.69645
GOTERM_BP_DIRECT	GO:0071044~histone mRNA catabolic process	8	0.324018	0.000974923	ENSG00000083223, ENSG00000114127, ENSG00000172795, ENSG00000149311, ENSG00000134744, ENSG00000005007, ENSG00000164329, ENSG00000121274	2203	14	16792	4.35562	0.986332	0.0778016	1.81464
GOTERM_BP_DIRECT	GO:0031929~TOR signaling	8	0.324018	0.000974923	ENSG00000148730, ENSG00000217128, ENSG00000141564, ENSG00000115355, ENSG00000198793, ENSG00000164327, ENSG00000108443, ENSG00000155506	2203	14	16792	4.35562	0.986332	0.0778016	1.81464
GOTERM_BP_DIRECT	GO:0006366~transcription from RNA polymerase II promoter	93	3.76671	0.000980937	ENSG00000144747, ENSG00000120948, ENSG00000032219, ENSG00000160199, ENSG00000071794, ENSG00000118260, ENSG00000011007, ENSG00000112592, ENSG00000164975, ENSG00000113649, ENSG00000188994, ENSG00000114503, ENSG00000153879, ENSG00000173039, ENSG00000086102, ENSG00000143799, ENSG00000070047, ENSG00000198373, ENSG00000101158, ENSG00000204217, ENSG00000196235, ENSG00000136451, ENSG00000141644, ENSG0000…	2203	513	16792	1.38183	0.98669	0.0768703	1.82573
GOTERM_BP_DIRECT	GO:0007049~cell cycle	46	1.8631	0.00109621	ENSG00000168769, ENSG00000147133, ENSG00000178184, ENSG00000100014, ENSG00000197122, ENSG00000138758, ENSG00000118412, ENSG00000015171, ENSG00000124171, ENSG00000103479, ENSG00000196235, ENSG00000146457, ENSG00000135164, ENSG00000149679, ENSG00000112245, ENSG00000165527, ENSG00000011454, ENSG00000196470, ENSG00000189369, ENSG00000157500, ENSG00000082258, ENSG00000099956, ENSG00000153487, ENSG0000…	2203	217	16792	1.61579	0.99199	0.0840239	2.0382
GOTERM_BP_DIRECT	GO:0006369~termination of RNA polymerase II transcription	19	0.769542	0.00111153	ENSG00000165494, ENSG00000205937, ENSG00000101811, ENSG00000116350, ENSG00000100227, ENSG00000133226, ENSG00000140829, ENSG00000149532, ENSG00000090060, ENSG00000114503, ENSG00000163950, ENSG00000145216, ENSG00000058673, ENSG00000107290, ENSG00000063244, ENSG00000167005, ENSG00000142528, ENSG00000101138, ENSG00000136937	2203	64	16792	2.26288	0.992513	0.083692	2.06639
GOTERM_BP_DIRECT	GO:1990090~cellular response to nerve growth factor stimulus	12	0.486027	0.00130986	ENSG00000141551, ENSG00000107263, ENSG00000096401, ENSG00000142208, ENSG00000118260, ENSG00000101811, ENSG00000111737, ENSG00000118689, ENSG00000171634, ENSG00000134313, ENSG00000213923, ENSG00000110395	2203	31	16792	2.95058	0.996875	0.0962487	2.43083
GOTERM_BP_DIRECT	GO:0031124~mRNA 3'-end processing	16	0.648036	0.00138044	ENSG00000165494, ENSG00000205937, ENSG00000101811, ENSG00000116350, ENSG00000100227, ENSG00000140829, ENSG00000133226, ENSG00000149532, ENSG00000090060, ENSG00000114503, ENSG00000145216, ENSG00000058673, ENSG00000063244, ENSG00000167005, ENSG00000101138, ENSG00000136937	2203	50	16792	2.43915	0.997711	0.099513	2.56022
GOTERM_BP_DIRECT	GO:0006405~RNA export from nucleus	17	0.688538	0.00139315	ENSG00000095319, ENSG00000205937, ENSG00000126883, ENSG00000116350, ENSG00000100227, ENSG00000140829, ENSG00000133226, ENSG00000047410, ENSG00000114503, ENSG00000110713, ENSG00000113569, ENSG00000058673, ENSG00000063244, ENSG00000162231, ENSG00000196313, ENSG00000213024, ENSG00000136937	2203	55	16792	2.35599	0.997835	0.0987676	2.5835
GOTERM_BP_DIRECT	GO:0006610~ribosomal protein import into nucleus	6	0.243013	0.00153159	ENSG00000196497, ENSG00000105576, ENSG00000108424, ENSG00000083312, ENSG00000137040, ENSG00000065150	2203	8	16792	5.71675	0.998824	0.106339	2.83674
GOTERM_BP_DIRECT	GO:1900364~negative regulation of mRNA polyadenylation	6	0.243013	0.00153159	ENSG00000155827, ENSG00000103549, ENSG00000198730, ENSG00000129315, ENSG00000196235, ENSG00000100722	2203	8	16792	5.71675	0.998824	0.106339	2.83674
GOTERM_BP_DIRECT	GO:0030521~androgen receptor signaling pathway	14	0.567031	0.0016214	ENSG00000180182, ENSG00000108510, ENSG00000114062, ENSG00000184634, ENSG00000033800, ENSG00000054118, ENSG00000117713, ENSG00000124151, ENSG00000042429, ENSG00000125686, ENSG00000063978, ENSG00000078043, ENSG00000155974, ENSG00000204209	2203	41	16792	2.60275	0.999208	0.110481	3.00069
GOTERM_BP_DIRECT	GO:0043044~ATP-dependent chromatin remodeling	10	0.405022	0.00163037	ENSG00000111642, ENSG00000127616, ENSG00000102038, ENSG00000099956, ENSG00000163104, ENSG00000149480, ENSG00000117713, ENSG00000139613, ENSG00000100888, ENSG00000143614	2203	23	16792	3.31406	0.999239	0.109368	3.01705
GOTERM_BP_DIRECT	GO:0016339~calcium-dependent cell-cell adhesion via plasma membrane cell adhesion molecules	11	0.445525	0.00204157	ENSG00000112852, ENSG00000120327, ENSG00000120324, ENSG00000113209, ENSG00000113205, ENSG00000187372, ENSG00000179915, ENSG00000197479, ENSG00000166341, ENSG00000113211, ENSG00000170558	2203	28	16792	2.99449	0.999876	0.133042	3.76427
GOTERM_BP_DIRECT	GO:0009411~response to UV	14	0.567031	0.00207041	ENSG00000225830, ENSG00000158941, ENSG00000119401, ENSG00000140464, ENSG00000107643, ENSG00000163161, ENSG00000130939, ENSG00000175595, ENSG00000134899, ENSG00000133895, ENSG00000135945, ENSG00000132356, ENSG00000011566, ENSG00000136273	2203	42	16792	2.54078	0.999891	0.132831	3.81648
GOTERM_BP_DIRECT	GO:0009791~post-embryonic development	20	0.810045	0.00222977	ENSG00000056586, ENSG00000169057, ENSG00000118058, ENSG00000168769, ENSG00000117139, ENSG00000197081, ENSG00000123908, ENSG00000163348, ENSG00000156052, ENSG00000166224, ENSG00000204120, ENSG00000114739, ENSG00000198793, ENSG00000159256, ENSG00000104331, ENSG00000175387, ENSG00000126003, ENSG00000136381, ENSG00000171016, ENSG00000171310	2203	73	16792	2.08831	0.999946	0.140274	4.10444
GOTERM_BP_DIRECT	GO:0000244~spliceosomal tri-snRNP complex assembly	7	0.283516	0.00229965	ENSG00000105618, ENSG00000075856, ENSG00000174231, ENSG00000131043, ENSG00000064703, ENSG00000114316, ENSG00000101161	2203	12	16792	4.44636	0.99996	0.142317	4.23045
GOTERM_BP_DIRECT	GO:0006370~7-methylguanosine mRNA capping	12	0.486027	0.00233423	ENSG00000111358, ENSG00000047315, ENSG00000144231, ENSG00000111880, ENSG00000163161, ENSG00000196235, ENSG00000101654, ENSG00000114503, ENSG00000125651, ENSG00000074356, ENSG00000136937, ENSG00000137200	2203	33	16792	2.77176	0.999966	0.142305	4.29276
GOTERM_BP_DIRECT	GO:1904837~beta-catenin-TCF complex assembly	14	0.567031	0.00261688	ENSG00000186174, ENSG00000127616, ENSG00000117222, ENSG00000116128, ENSG00000167548, ENSG00000005339, ENSG00000129691, ENSG00000140332, ENSG00000133895, ENSG00000163348, ENSG00000196367, ENSG00000168646, ENSG00000171016, ENSG00000166477	2203	43	16792	2.48169	0.99999	0.155988	4.80056
GOTERM_BP_DIRECT	GO:0006888~ER to Golgi vesicle-mediated transport	35	1.41758	0.00276458	ENSG00000181789, ENSG00000150961, ENSG00000107862, ENSG00000158623, ENSG00000151532, ENSG00000122218, ENSG00000074695, ENSG00000101310, ENSG00000242247, ENSG00000138802, ENSG00000107651, ENSG00000106636, ENSG00000138674, ENSG00000047932, ENSG00000153339, ENSG00000095139, ENSG00000113615, ENSG00000114988, ENSG00000036257, ENSG00000115216, ENSG00000154305, ENSG00000176986, ENSG00000021574, ENSG0000…	2203	160	16792	1.66739	0.999995	0.161865	5.06489
GOTERM_BP_DIRECT	GO:0018105~peptidyl-serine phosphorylation	29	1.17456	0.00285681	ENSG00000169118, ENSG00000147133, ENSG00000197122, ENSG00000157106, ENSG00000140992, ENSG00000173273, ENSG00000198793, ENSG00000151292, ENSG00000112062, ENSG00000213923, ENSG00000176749, ENSG00000107643, ENSG00000089022, ENSG00000086015, ENSG00000164327, ENSG00000141551, ENSG00000146872, ENSG00000101109, ENSG00000082701, ENSG00000172071, ENSG00000113712, ENSG00000142208, ENSG00000149311, ENSG0000…	2203	125	16792	1.76838	0.999997	0.16462	5.22961
GOTERM_BP_DIRECT	GO:0050684~regulation of mRNA processing	6	0.243013	0.00307423	ENSG00000096063, ENSG00000109111, ENSG00000137776, ENSG00000160633, ENSG00000163166, ENSG00000008128	2203	9	16792	5.08156	0.999999	0.173745	5.61681
GOTERM_BP_DIRECT	GO:0000375~RNA splicing, via transesterification reactions	10	0.405022	0.00319192	ENSG00000189091, ENSG00000174243, ENSG00000183431, ENSG00000143368, ENSG00000174231, ENSG00000116350, ENSG00000115524, ENSG00000133226, ENSG00000136875, ENSG00000101161	2203	25	16792	3.04893	0.999999	0.177509	5.82579
GOTERM_BP_DIRECT	GO:0008333~endosome to lysosome transport	13	0.526529	0.00321227	ENSG00000104142, ENSG00000166887, ENSG00000215305, ENSG00000168172, ENSG00000100281, ENSG00000139719, ENSG00000182606, ENSG00000143376, ENSG00000135966, ENSG00000151445, ENSG00000126775, ENSG00000136021, ENSG00000102858	2203	39	16792	2.54078	0.999999	0.176319	5.86188
GOTERM_BP_DIRECT	GO:0032508~DNA duplex unwinding	14	0.567031	0.00327582	ENSG00000111642, ENSG00000135829, ENSG00000128908, ENSG00000215301, ENSG00000107290, ENSG00000170004, ENSG00000112249, ENSG00000153922, ENSG00000132740, ENSG00000113522, ENSG00000085224, ENSG00000165392, ENSG00000100888, ENSG00000134452	2203	44	16792	2.42529	0.999999	0.177283	5.9745
GOTERM_BP_DIRECT	GO:0023014~signal transduction by protein phosphorylation	14	0.567031	0.00327582	ENSG00000171105, ENSG00000101109, ENSG00000172939, ENSG00000114904, ENSG00000135503, ENSG00000114739, ENSG00000204217, ENSG00000121989, ENSG00000180370, ENSG00000107779, ENSG00000115170, ENSG00000101349, ENSG00000137601, ENSG00000071054	2203	44	16792	2.42529	0.999999	0.177283	5.9745
GOTERM_BP_DIRECT	GO:0010793~regulation of mRNA export from nucleus	5	0.202511	0.00354866	ENSG00000109111, ENSG00000047410, ENSG00000181555, ENSG00000014164, ENSG00000163166	2203	6	16792	6.35194	1	0.188285	6.45656
GOTERM_BP_DIRECT	GO:0010606~positive regulation of cytoplasmic mRNA processing body assembly	5	0.202511	0.00354866	ENSG00000152520, ENSG00000125107, ENSG00000138767, ENSG00000111596, ENSG00000113300	2203	6	16792	6.35194	1	0.188285	6.45656
GOTERM_BP_DIRECT	GO:0016180~snRNA processing	7	0.283516	0.00379973	ENSG00000104299, ENSG00000149262, ENSG00000143493, ENSG00000102786, ENSG00000164880, ENSG00000108506, ENSG00000143624	2203	13	16792	4.10433	1	0.197845	6.89809
GOTERM_BP_DIRECT	GO:0000226~microtubule cytoskeleton organization	19	0.769542	0.00390823	ENSG00000163539, ENSG00000114999, ENSG00000118200, ENSG00000074054, ENSG00000100014, ENSG00000163635, ENSG00000131711, ENSG00000151422, ENSG00000136861, ENSG00000007168, ENSG00000101004, ENSG00000138162, ENSG00000109917, ENSG00000075413, ENSG00000116641, ENSG00000186868, ENSG00000044090, ENSG00000116141, ENSG00000143924	2203	71	16792	2.03978	1	0.200538	7.08829
GOTERM_BP_DIRECT	GO:0019827~stem cell population maintenance	15	0.607533	0.00399504	ENSG00000180182, ENSG00000184634, ENSG00000099381, ENSG00000107779, ENSG00000134744, ENSG00000184708, ENSG00000042429, ENSG00000143033, ENSG00000110367, ENSG00000198730, ENSG00000137815, ENSG00000164190, ENSG00000080345, ENSG00000166477, ENSG00000144535	2203	50	16792	2.2867	1	0.202173	7.24018
GOTERM_BP_DIRECT	GO:0045944~positive regulation of transcription from RNA polymerase II promoter	158	6.39935	0.00403668	ENSG00000128908, ENSG00000180182, ENSG00000215301, ENSG00000032219, ENSG00000160199, ENSG00000071794, ENSG00000168826, ENSG00000100207, ENSG00000116128, ENSG00000100201, ENSG00000083635, ENSG00000188994, ENSG00000173039, ENSG00000177311, ENSG00000078699, ENSG00000204217, ENSG00000140464, ENSG00000130726, ENSG00000198911, ENSG00000118689, ENSG00000116539, ENSG00000141646, ENSG00000166529, ENSG0000…	2203	981	16792	1.22765	1	0.20175	7.31298
GOTERM_BP_DIRECT	GO:0016192~vesicle-mediated transport	33	1.33657	0.00419692	ENSG00000079332, ENSG00000181789, ENSG00000166887, ENSG00000138107, ENSG00000158623, ENSG00000073921, ENSG00000139719, ENSG00000168538, ENSG00000101310, ENSG00000119396, ENSG00000129472, ENSG00000242247, ENSG00000113282, ENSG00000138802, ENSG00000155961, ENSG00000106636, ENSG00000165527, ENSG00000171853, ENSG00000104142, ENSG00000029725, ENSG00000185009, ENSG00000166747, ENSG00000006125, ENSG0000…	2203	152	16792	1.65485	1	0.206553	7.59255
GOTERM_BP_DIRECT	GO:0021987~cerebral cortex development	16	0.648036	0.00465723	ENSG00000147316, ENSG00000130396, ENSG00000134294, ENSG00000004487, ENSG00000070018, ENSG00000196712, ENSG00000007168, ENSG00000165699, ENSG00000138162, ENSG00000167632, ENSG00000076924, ENSG00000168944, ENSG00000157193, ENSG00000100644, ENSG00000159131, ENSG00000170558	2203	56	16792	2.17781	1	0.224024	8.39124
GOTERM_BP_DIRECT	GO:0010507~negative regulation of autophagy	12	0.486027	0.00499522	ENSG00000146872, ENSG00000157625, ENSG00000187626, ENSG00000178252, ENSG00000066135, ENSG00000142208, ENSG00000103657, ENSG00000189298, ENSG00000110321, ENSG00000198793, ENSG00000132405, ENSG00000055208	2203	36	16792	2.54078	1	0.23568	8.97352
GOTERM_BP_DIRECT	GO:0000186~activation of MAPKK activity	14	0.567031	0.00499708	ENSG00000107263, ENSG00000198909, ENSG00000132155, ENSG00000166225, ENSG00000169967, ENSG00000124181, ENSG00000135341, ENSG00000157764, ENSG00000085511, ENSG00000134313, ENSG00000096968, ENSG00000167193, ENSG00000099942, ENSG00000073803	2203	46	16792	2.31984	1	0.233277	8.97671
GOTERM_BP_DIRECT	GO:0044255~cellular lipid metabolic process	13	0.526529	0.00505585	ENSG00000140396, ENSG00000115159, ENSG00000082269, ENSG00000137574, ENSG00000142453, ENSG00000005339, ENSG00000141027, ENSG00000177565, ENSG00000125686, ENSG00000198646, ENSG00000169375, ENSG00000127511, ENSG00000177200	2203	41	16792	2.41684	1	0.233225	9.07761
GOTERM_BP_DIRECT	GO:0051301~cell division	64	2.59214	0.00524376	ENSG00000128908, ENSG00000163539, ENSG00000062650, ENSG00000135913, ENSG00000138758, ENSG00000155111, ENSG00000129933, ENSG00000083642, ENSG00000173273, ENSG00000165660, ENSG00000166974, ENSG00000149679, ENSG00000037474, ENSG00000144535, ENSG00000175470, ENSG00000094880, ENSG00000120253, ENSG00000060069, ENSG00000185515, ENSG00000082258, ENSG00000103275, ENSG00000152684, ENSG00000113812, ENSG0000…	2203	350	16792	1.3938	1	0.238312	9.39947
GOTERM_BP_DIRECT	GO:0051146~striated muscle cell differentiation	6	0.243013	0.00548748	ENSG00000213341, ENSG00000142208, ENSG00000133703, ENSG00000008294, ENSG00000112062, ENSG00000170558	2203	10	16792	4.5734	1	0.245418	9.81532
GOTERM_BP_DIRECT	GO:0035646~endosome to melanosome transport	6	0.243013	0.00548748	ENSG00000072958, ENSG00000104164, ENSG00000188428, ENSG00000065000, ENSG00000105186, ENSG00000166747	2203	10	16792	4.5734	1	0.245418	9.81532
GOTERM_BP_DIRECT	GO:0045943~positive regulation of transcription from RNA polymerase I promoter	6	0.243013	0.00548748	ENSG00000005100, ENSG00000119285, ENSG00000172071, ENSG00000108312, ENSG00000147133, ENSG00000172943	2203	10	16792	4.5734	1	0.245418	9.81532
GOTERM_BP_DIRECT	GO:0031023~microtubule organizing center organization	6	0.243013	0.00548748	ENSG00000136861, ENSG00000007168, ENSG00000163811, ENSG00000163539, ENSG00000074054, ENSG00000167716	2203	10	16792	4.5734	1	0.245418	9.81532
GOTERM_BP_DIRECT	GO:0034063~stress granule assembly	6	0.243013	0.00548748	ENSG00000168488, ENSG00000215301, ENSG00000055917, ENSG00000087263, ENSG00000151746, ENSG00000197102	2203	10	16792	4.5734	1	0.245418	9.81532
GOTERM_BP_DIRECT	GO:0032922~circadian regulation of gene expression	16	0.648036	0.00557017	ENSG00000179222, ENSG00000140396, ENSG00000147162, ENSG00000118058, ENSG00000073614, ENSG00000173914, ENSG00000108557, ENSG00000198380, ENSG00000096717, ENSG00000141551, ENSG00000153187, ENSG00000140464, ENSG00000182979, ENSG00000198900, ENSG00000008405, ENSG00000213923	2203	57	16792	2.1396	1	0.24615	9.956
GOTERM_BP_DIRECT	GO:0007020~microtubule nucleation	8	0.324018	0.00561348	ENSG00000141551, ENSG00000137822, ENSG00000126216, ENSG00000163539, ENSG00000109171, ENSG00000127914, ENSG00000074054, ENSG00000130640	2203	18	16792	3.3877	1	0.245371	10.0296
GOTERM_BP_DIRECT	GO:0007029~endoplasmic reticulum organization	10	0.405022	0.00573983	ENSG00000172071, ENSG00000114988, ENSG00000083097, ENSG00000148396, ENSG00000136816, ENSG00000142197, ENSG00000074695, ENSG00000058262, ENSG00000169905, ENSG00000139197	2203	27	16792	2.82309	1	0.247722	10.244
GOTERM_BP_DIRECT	GO:0007064~mitotic sister chromatid cohesion	7	0.283516	0.00591834	ENSG00000121892, ENSG00000168802, ENSG00000129933, ENSG00000083642, ENSG00000062650, ENSG00000164190, ENSG00000143442	2203	14	16792	3.81117	1	0.251936	10.5461
GOTERM_BP_DIRECT	GO:0032968~positive regulation of transcription elongation from RNA polymerase II promoter	7	0.283516	0.00591834	ENSG00000092201, ENSG00000109111, ENSG00000198730, ENSG00000137815, ENSG00000141867, ENSG00000125651, ENSG00000166477	2203	14	16792	3.81117	1	0.251936	10.5461
GOTERM_BP_DIRECT	GO:0048009~insulin-like growth factor receptor signaling pathway	7	0.283516	0.00591834	ENSG00000172071, ENSG00000204120, ENSG00000142208, ENSG00000169047, ENSG00000103197, ENSG00000197081, ENSG00000140443	2203	14	16792	3.81117	1	0.251936	10.5461
GOTERM_BP_DIRECT	GO:0007030~Golgi organization	19	0.769542	0.00623055	ENSG00000114988, ENSG00000163539, ENSG00000102606, ENSG00000107862, ENSG00000113384, ENSG00000141627, ENSG00000074054, ENSG00000066777, ENSG00000074695, ENSG00000066455, ENSG00000141551, ENSG00000166170, ENSG00000196535, ENSG00000113712, ENSG00000136152, ENSG00000215114, ENSG00000107651, ENSG00000107863, ENSG00000044090	2203	74	16792	1.95709	1	0.26086	11.0721
GOTERM_BP_DIRECT	GO:0006295~nucleotide-excision repair, DNA incision, 3'-to lesion	9	0.36452	0.00681094	ENSG00000111358, ENSG00000139842, ENSG00000134897, ENSG00000143799, ENSG00000163161, ENSG00000175595, ENSG00000134899, ENSG00000158290, ENSG00000167986	2203	23	16792	2.98265	1	0.278865	12.0421
GOTERM_BP_DIRECT	GO:0010467~gene expression	14	0.567031	0.00737687	ENSG00000144231, ENSG00000113384, ENSG00000169045, ENSG00000089775, ENSG00000114503, ENSG00000125651, ENSG00000177733, ENSG00000153187, ENSG00000125944, ENSG00000047315, ENSG00000146457, ENSG00000197111, ENSG00000169564, ENSG00000136937	2203	48	16792	2.22318	1	0.295584	12.9784
GOTERM_BP_DIRECT	GO:0060992~response to fungicide	5	0.202511	0.0074214	ENSG00000181090, ENSG00000117139, ENSG00000204371, ENSG00000004487, ENSG00000132510	2203	7	16792	5.44452	1	0.294437	13.0516
GOTERM_BP_DIRECT	GO:0034720~histone H3-K4 demethylation	5	0.202511	0.0074214	ENSG00000126012, ENSG00000073614, ENSG00000117139, ENSG00000165097, ENSG00000004487	2203	7	16792	5.44452	1	0.294437	13.0516
GOTERM_BP_DIRECT	GO:0010586~miRNA metabolic process	5	0.202511	0.0074214	ENSG00000113360, ENSG00000186666, ENSG00000123908, ENSG00000134698, ENSG00000134744	2203	7	16792	5.44452	1	0.294437	13.0516
GOTERM_BP_DIRECT	GO:0006513~protein monoubiquitination	10	0.405022	0.00749164	ENSG00000197579, ENSG00000049759, ENSG00000055130, ENSG00000102858, ENSG00000107341, ENSG00000036257, ENSG00000086758, ENSG00000117153, ENSG00000130939, ENSG00000175931	2203	28	16792	2.72226	1	0.29416	13.1671
GOTERM_BP_DIRECT	GO:0006378~mRNA polyadenylation	10	0.405022	0.00749164	ENSG00000111605, ENSG00000167005, ENSG00000165494, ENSG00000125755, ENSG00000101811, ENSG00000115421, ENSG00000101138, ENSG00000090060, ENSG00000014164, ENSG00000166477	2203	28	16792	2.72226	1	0.29416	13.1671
GOTERM_BP_DIRECT	GO:0018107~peptidyl-threonine phosphorylation	12	0.486027	0.00781464	ENSG00000082701, ENSG00000172939, ENSG00000176749, ENSG00000140992, ENSG00000142208, ENSG00000135503, ENSG00000173273, ENSG00000107643, ENSG00000147133, ENSG00000198793, ENSG00000115170, ENSG00000157540	2203	38	16792	2.40705	1	0.302086	13.6961
GOTERM_BP_DIRECT	GO:0006895~Golgi to endosome transport	8	0.324018	0.00789605	ENSG00000083097, ENSG00000107862, ENSG00000142197, ENSG00000076321, ENSG00000131381, ENSG00000119396, ENSG00000129003, ENSG00000061987	2203	19	16792	3.2094	1	0.302097	13.829
GOTERM_BP_DIRECT	GO:0000972~transcription-dependent tethering of RNA polymerase II gene DNA at nuclear periphery	4	0.162009	0.00812427	ENSG00000198728, ENSG00000101146, ENSG00000113569, ENSG00000069248	2203	4	16792	7.62233	1	0.30673	14.2004
GOTERM_BP_DIRECT	GO:0090309~positive regulation of methylation-dependent chromatin silencing	4	0.162009	0.00812427	ENSG00000130816, ENSG00000131845, ENSG00000130726, ENSG00000143379	2203	4	16792	7.62233	1	0.30673	14.2004
GOTERM_BP_DIRECT	GO:0051292~nuclear pore complex assembly	6	0.243013	0.00898301	ENSG00000115310, ENSG00000153207, ENSG00000124789, ENSG00000047410, ENSG00000110713, ENSG00000058804	2203	11	16792	4.15764	1	0.330444	15.5843
GOTERM_BP_DIRECT	GO:0045945~positive regulation of transcription from RNA polymerase III promoter	6	0.243013	0.00898301	ENSG00000185024, ENSG00000141564, ENSG00000198793, ENSG00000144161, ENSG00000164151, ENSG00000100888	2203	11	16792	4.15764	1	0.330444	15.5843
GOTERM_BP_DIRECT	GO:0045648~positive regulation of erythrocyte differentiation	9	0.36452	0.00906232	ENSG00000125686, ENSG00000135503, ENSG00000170631, ENSG00000121989, ENSG00000004487, ENSG00000118689, ENSG00000112305, ENSG00000112062, ENSG00000100644	2203	24	16792	2.85837	1	0.330116	15.7111
GOTERM_BP_DIRECT	GO:0030433~ER-associated ubiquitin-dependent protein catabolic process	16	0.648036	0.00920171	ENSG00000071537, ENSG00000135018, ENSG00000184787, ENSG00000138942, ENSG00000134109, ENSG00000136986, ENSG00000116406, ENSG00000172046, ENSG00000165280, ENSG00000113194, ENSG00000110344, ENSG00000180667, ENSG00000135506, ENSG00000188021, ENSG00000130939, ENSG00000145495	2203	60	16792	2.03262	1	0.331563	15.9334
GOTERM_BP_DIRECT	GO:0000289~nuclear-transcribed mRNA poly(A) tail shortening	10	0.405022	0.00962334	ENSG00000144580, ENSG00000088038, ENSG00000152520, ENSG00000063046, ENSG00000080802, ENSG00000155508, ENSG00000125107, ENSG00000138767, ENSG00000111596, ENSG00000113300	2203	29	16792	2.62839	1	0.34113	16.6025
GOTERM_BP_DIRECT	GO:0043928~exonucleolytic nuclear-transcribed mRNA catabolic process involved in deadenylation-dependent decay	10	0.405022	0.00962334	ENSG00000110367, ENSG00000166889, ENSG00000151065, ENSG00000130713, ENSG00000172795, ENSG00000038358, ENSG00000083520, ENSG00000179151, ENSG00000155508, ENSG00000113300	2203	29	16792	2.62839	1	0.34113	16.6025
GOTERM_BP_DIRECT	GO:0051726~regulation of cell cycle	27	1.09356	0.00970967	ENSG00000120948, ENSG00000070444, ENSG00000198873, ENSG00000197122, ENSG00000159692, ENSG00000171862, ENSG00000112144, ENSG00000155111, ENSG00000103479, ENSG00000149679, ENSG00000134644, ENSG00000132436, ENSG00000167258, ENSG00000100029, ENSG00000126883, ENSG00000138764, ENSG00000204138, ENSG00000125686, ENSG00000147854, ENSG00000086712, ENSG00000189308, ENSG00000165699, ENSG00000163374, ENSG0000…	2203	124	16792	1.6597	1	0.340916	16.7389
GOTERM_BP_DIRECT	GO:0031122~cytoplasmic microtubule organization	11	0.445525	0.00976384	ENSG00000021574, ENSG00000132436, ENSG00000137822, ENSG00000126216, ENSG00000109171, ENSG00000168172, ENSG00000103126, ENSG00000078674, ENSG00000212916, ENSG00000102781, ENSG00000130640	2203	34	16792	2.46605	1	0.339798	16.8244
GOTERM_BP_DIRECT	GO:0006302~double-strand break repair	17	0.688538	0.00990641	ENSG00000128908, ENSG00000163961, ENSG00000185515, ENSG00000009954, ENSG00000005156, ENSG00000158161, ENSG00000081177, ENSG00000042088, ENSG00000087206, ENSG00000165280, ENSG00000112941, ENSG00000143799, ENSG00000107290, ENSG00000101442, ENSG00000182979, ENSG00000113522, ENSG00000165392	2203	66	16792	1.96333	1	0.34117	17.0489
GOTERM_BP_DIRECT	GO:0051865~protein autoubiquitination	14	0.567031	0.0105726	ENSG00000114062, ENSG00000167333, ENSG00000198060, ENSG00000135679, ENSG00000138942, ENSG00000022840, ENSG00000080802, ENSG00000175104, ENSG00000198373, ENSG00000147854, ENSG00000063978, ENSG00000130939, ENSG00000118518, ENSG00000103429	2203	50	16792	2.13425	1	0.356801	18.0906
GOTERM_BP_DIRECT	GO:0045773~positive regulation of axon extension	10	0.405022	0.012182	ENSG00000082701, ENSG00000007168, ENSG00000112658, ENSG00000110321, ENSG00000101126, ENSG00000186868, ENSG00000018189, ENSG00000127603, ENSG00000198910, ENSG00000131711	2203	30	16792	2.54078	1	0.395971	20.5562
GOTERM_BP_DIRECT	GO:0000077~DNA damage checkpoint	10	0.405022	0.012182	ENSG00000172273, ENSG00000149311, ENSG00000143493, ENSG00000152942, ENSG00000113456, ENSG00000164053, ENSG00000104885, ENSG00000112062, ENSG00000067369, ENSG00000136273	2203	30	16792	2.54078	1	0.395971	20.5562
GOTERM_BP_DIRECT	GO:0006349~regulation of gene expression by genetic imprinting	7	0.283516	0.0125166	ENSG00000032219, ENSG00000082701, ENSG00000102974, ENSG00000169057, ENSG00000165097, ENSG00000119772, ENSG00000054267	2203	16	16792	3.33477	1	0.401466	21.06
GOTERM_BP_DIRECT	GO:0010458~exit from mitosis	6	0.243013	0.0137568	ENSG00000175470, ENSG00000021574, ENSG00000147457, ENSG00000060069, ENSG00000163539, ENSG00000074054	2203	12	16792	3.81117	1	0.428393	22.9007
GOTERM_BP_DIRECT	GO:0061014~positive regulation of mRNA catabolic process	6	0.243013	0.0137568	ENSG00000125944, ENSG00000135870, ENSG00000100226, ENSG00000155508, ENSG00000125107, ENSG00000005007	2203	12	16792	3.81117	1	0.428393	22.9007
GOTERM_BP_DIRECT	GO:0006293~nucleotide-excision repair, preincision complex stabilization	8	0.324018	0.0143956	ENSG00000111358, ENSG00000139842, ENSG00000143799, ENSG00000163161, ENSG00000175595, ENSG00000134899, ENSG00000158290, ENSG00000167986	2203	21	16792	2.90375	1	0.44018	23.8328
GOTERM_BP_DIRECT	GO:0030520~intracellular estrogen receptor signaling pathway	8	0.324018	0.0143956	ENSG00000198646, ENSG00000100320, ENSG00000117713, ENSG00000142453, ENSG00000160633, ENSG00000197122, ENSG00000103671, ENSG00000239306	2203	21	16792	2.90375	1	0.44018	23.8328
GOTERM_BP_DIRECT	GO:0007040~lysosome organization	11	0.445525	0.0148311	ENSG00000187626, ENSG00000104142, ENSG00000177182, ENSG00000168172, ENSG00000138760, ENSG00000189298, ENSG00000111670, ENSG00000140943, ENSG00000100099, ENSG00000143669, ENSG00000113273	2203	36	16792	2.32905	1	0.447022	24.4623
GOTERM_BP_DIRECT	GO:0006446~regulation of translational initiation	11	0.445525	0.0148311	ENSG00000128829, ENSG00000107581, ENSG00000183655, ENSG00000119392, ENSG00000110321, ENSG00000134030, ENSG00000063046, ENSG00000106263, ENSG00000114503, ENSG00000136937, ENSG00000111361	2203	36	16792	2.32905	1	0.447022	24.4623
GOTERM_BP_DIRECT	GO:0042147~retrograde transport, endosome to Golgi	17	0.688538	0.0151768	ENSG00000172661, ENSG00000151502, ENSG00000107862, ENSG00000151532, ENSG00000135823, ENSG00000082805, ENSG00000175931, ENSG00000107185, ENSG00000204713, ENSG00000115020, ENSG00000008294, ENSG00000107036, ENSG00000108587, ENSG00000185722, ENSG00000106636, ENSG00000169221, ENSG00000143952	2203	69	16792	1.87797	1	0.451703	24.9583
GOTERM_BP_DIRECT	GO:0090305~nucleic acid phosphodiester bond hydrolysis	18	0.72904	0.015699	ENSG00000078177, ENSG00000009413, ENSG00000157036, ENSG00000157014, ENSG00000152684, ENSG00000164002, ENSG00000113456, ENSG00000197121, ENSG00000081177, ENSG00000042088, ENSG00000148300, ENSG00000197157, ENSG00000114127, ENSG00000211460, ENSG00000113522, ENSG00000122512, ENSG00000165392, ENSG00000118655	2203	75	16792	1.82936	1	0.460049	25.7019
GOTERM_BP_DIRECT	GO:0002223~stimulatory C-type lectin receptor signaling pathway	23	0.931551	0.0165585	ENSG00000095261, ENSG00000213341, ENSG00000132155, ENSG00000072803, ENSG00000133703, ENSG00000005339, ENSG00000108344, ENSG00000197122, ENSG00000108671, ENSG00000175166, ENSG00000175104, ENSG00000172175, ENSG00000055208, ENSG00000173039, ENSG00000157625, ENSG00000010810, ENSG00000100324, ENSG00000140992, ENSG00000055130, ENSG00000135341, ENSG00000180370, ENSG00000068878, ENSG00000142867	2203	105	16792	1.66965	1	0.475126	26.9106
GOTERM_BP_DIRECT	GO:0032436~positive regulation of proteasomal ubiquitin-dependent protein catabolic process	16	0.648036	0.0166965	ENSG00000033800, ENSG00000135679, ENSG00000147133, ENSG00000072609, ENSG00000166233, ENSG00000177479, ENSG00000013374, ENSG00000141551, ENSG00000082701, ENSG00000165280, ENSG00000113712, ENSG00000142208, ENSG00000116514, ENSG00000001629, ENSG00000151692, ENSG00000213923	2203	64	16792	1.90558	1	0.475003	27.103
GOTERM_BP_DIRECT	GO:0070935~3'-UTR-mediated mRNA stabilization	7	0.283516	0.017237	ENSG00000066044, ENSG00000120948, ENSG00000174606, ENSG00000172936, ENSG00000182872, ENSG00000112062, ENSG00000177733	2203	17	16792	3.13861	1	0.482976	27.8515
GOTERM_BP_DIRECT	GO:1901216~positive regulation of neuron death	7	0.283516	0.017237	ENSG00000082701, ENSG00000143799, ENSG00000097007, ENSG00000073921, ENSG00000181220, ENSG00000204209, ENSG00000198793	2203	17	16792	3.13861	1	0.482976	27.8515
GOTERM_BP_DIRECT	GO:0051571~positive regulation of histone H3-K4 methylation	7	0.283516	0.017237	ENSG00000147162, ENSG00000130816, ENSG00000118058, ENSG00000100603, ENSG00000198730, ENSG00000137815, ENSG00000141646	2203	17	16792	3.13861	1	0.482976	27.8515
GOTERM_BP_DIRECT	GO:0016571~histone methylation	7	0.283516	0.017237	ENSG00000169057, ENSG00000181090, ENSG00000178691, ENSG00000204371, ENSG00000165671, ENSG00000142453, ENSG00000147548	2203	17	16792	3.13861	1	0.482976	27.8515
GOTERM_BP_DIRECT	GO:0006337~nucleosome disassembly	7	0.283516	0.017237	ENSG00000092201, ENSG00000127616, ENSG00000066117, ENSG00000099956, ENSG00000117713, ENSG00000139613, ENSG00000189079	2203	17	16792	3.13861	1	0.482976	27.8515
GOTERM_BP_DIRECT	GO:1904885~beta-catenin destruction complex assembly	4	0.162009	0.0183299	ENSG00000082701, ENSG00000113712, ENSG00000103126, ENSG00000184675	2203	5	16792	6.09787	1	0.501366	29.3431
GOTERM_BP_DIRECT	GO:1904354~negative regulation of telomere capping	4	0.162009	0.0183299	ENSG00000070366, ENSG00000149311, ENSG00000132604, ENSG00000113522	2203	5	16792	6.09787	1	0.501366	29.3431
GOTERM_BP_DIRECT	GO:0022027~interkinetic nuclear migration	4	0.162009	0.0183299	ENSG00000168172, ENSG00000116641, ENSG00000168944, ENSG00000078674	2203	5	16792	6.09787	1	0.501366	29.3431
GOTERM_BP_DIRECT	GO:0051534~negative regulation of NFAT protein import into nucleus	4	0.162009	0.0183299	ENSG00000082701, ENSG00000127334, ENSG00000166484, ENSG00000198793	2203	5	16792	6.09787	1	0.501366	29.3431
GOTERM_BP_DIRECT	GO:0010632~regulation of epithelial cell migration	4	0.162009	0.0183299	ENSG00000197122, ENSG00000127603, ENSG00000110880, ENSG00000113273	2203	5	16792	6.09787	1	0.501366	29.3431
GOTERM_BP_DIRECT	GO:0030035~microspike assembly	4	0.162009	0.0183299	ENSG00000139132, ENSG00000097007, ENSG00000170873, ENSG00000075618	2203	5	16792	6.09787	1	0.501366	29.3431
GOTERM_BP_DIRECT	GO:0016310~phosphorylation	22	0.891049	0.0184544	ENSG00000078177, ENSG00000059573, ENSG00000162408, ENSG00000008130, ENSG00000120137, ENSG00000171608, ENSG00000152782, ENSG00000121879, ENSG00000113716, ENSG00000138801, ENSG00000145725, ENSG00000076685, ENSG00000139163, ENSG00000196367, ENSG00000142208, ENSG00000044446, ENSG00000086544, ENSG00000157881, ENSG00000180370, ENSG00000198793, ENSG00000198900, ENSG00000172992	2203	100	16792	1.67691	1	0.500784	29.5112
GOTERM_BP_DIRECT	GO:0070911~global genome nucleotide-excision repair	10	0.405022	0.0187672	ENSG00000111358, ENSG00000139842, ENSG00000143799, ENSG00000157450, ENSG00000119318, ENSG00000163161, ENSG00000103275, ENSG00000175595, ENSG00000158290, ENSG00000167986	2203	32	16792	2.38198	1	0.503746	29.9318
GOTERM_BP_DIRECT	GO:0043087~regulation of GTPase activity	16	0.648036	0.0191507	ENSG00000122126, ENSG00000164327, ENSG00000196712, ENSG00000133812, ENSG00000145242, ENSG00000139132, ENSG00000160293, ENSG00000130827, ENSG00000165219, ENSG00000007168, ENSG00000102302, ENSG00000198793, ENSG00000169221, ENSG00000075391, ENSG00000118873, ENSG00000167193	2203	65	16792	1.87627	1	0.507945	30.4441
GOTERM_BP_DIRECT	GO:0031054~pre-miRNA processing	6	0.243013	0.01998	ENSG00000113360, ENSG00000100697, ENSG00000123908, ENSG00000134698, ENSG00000160710, ENSG00000134744	2203	13	16792	3.518	1	0.520048	31.5401
GOTERM_BP_DIRECT	GO:0048268~clathrin coat assembly	6	0.243013	0.01998	ENSG00000113282, ENSG00000170091, ENSG00000073921, ENSG00000127946, ENSG00000006125, ENSG00000157107	2203	13	16792	3.518	1	0.520048	31.5401
GOTERM_BP_DIRECT	GO:0000956~nuclear-transcribed mRNA catabolic process	6	0.243013	0.01998	ENSG00000151779, ENSG00000114127, ENSG00000054118, ENSG00000135870, ENSG00000134815, ENSG00000005007	2203	13	16792	3.518	1	0.520048	31.5401
GOTERM_BP_DIRECT	GO:0048511~rhythmic process	14	0.567031	0.0200876	ENSG00000135829, ENSG00000126012, ENSG00000176749, ENSG00000072803, ENSG00000107643, ENSG00000117139, ENSG00000005339, ENSG00000158941, ENSG00000116560, ENSG00000169375, ENSG00000101266, ENSG00000121390, ENSG00000120658, ENSG00000132356	2203	54	16792	1.97616	1	0.51906	31.681
GOTERM_BP_DIRECT	GO:0001843~neural tube closure	18	0.72904	0.0201629	ENSG00000184634, ENSG00000120254, ENSG00000168758, ENSG00000117713, ENSG00000107882, ENSG00000070018, ENSG00000175104, ENSG00000181555, ENSG00000147050, ENSG00000204138, ENSG00000138802, ENSG00000165699, ENSG00000162738, ENSG00000103197, ENSG00000120868, ENSG00000103351, ENSG00000160007, ENSG00000142867	2203	77	16792	1.78184	1	0.517518	31.7795
GOTERM_BP_DIRECT	GO:0032886~regulation of microtubule-based process	5	0.202511	0.0215008	ENSG00000131504, ENSG00000082701, ENSG00000163539, ENSG00000212916, ENSG00000127603	2203	9	16792	4.23463	1	0.537647	33.5073
GOTERM_BP_DIRECT	GO:0000463~maturation of LSU-rRNA from tricistronic rRNA transcript (SSU-rRNA, 5.8S rRNA, LSU-rRNA)	5	0.202511	0.0215008	ENSG00000107937, ENSG00000100029, ENSG00000108592, ENSG00000138442, ENSG00000146223	2203	9	16792	4.23463	1	0.537647	33.5073
GOTERM_BP_DIRECT	GO:1903827~regulation of cellular protein localization	5	0.202511	0.0215008	ENSG00000143799, ENSG00000135823, ENSG00000004487, ENSG00000161202, ENSG00000213923	2203	9	16792	4.23463	1	0.537647	33.5073
GOTERM_BP_DIRECT	GO:0035562~negative regulation of chromatin binding	5	0.202511	0.0215008	ENSG00000131845, ENSG00000062650, ENSG00000139372, ENSG00000095564, ENSG00000134452	2203	9	16792	4.23463	1	0.537647	33.5073
GOTERM_BP_DIRECT	GO:0034058~endosomal vesicle fusion	5	0.202511	0.0215008	ENSG00000166887, ENSG00000156931, ENSG00000131381, ENSG00000185722, ENSG00000135966	2203	9	16792	4.23463	1	0.537647	33.5073
GOTERM_BP_DIRECT	GO:0007289~spermatid nucleus differentiation	5	0.202511	0.0215008	ENSG00000144747, ENSG00000047932, ENSG00000173744, ENSG00000171016, ENSG00000163348	2203	9	16792	4.23463	1	0.537647	33.5073
GOTERM_BP_DIRECT	GO:0007097~nuclear migration	5	0.202511	0.0215008	ENSG00000007168, ENSG00000163811, ENSG00000132912, ENSG00000167716, ENSG00000133026	2203	9	16792	4.23463	1	0.537647	33.5073
GOTERM_BP_DIRECT	GO:0009790~embryo development	11	0.445525	0.0216342	ENSG00000145715, ENSG00000176749, ENSG00000181090, ENSG00000139372, ENSG00000204463, ENSG00000119396, ENSG00000153827, ENSG00000164327, ENSG00000149187, ENSG00000124422, ENSG00000136273	2203	38	16792	2.20646	1	0.537013	33.6773
GOTERM_BP_DIRECT	GO:0007067~mitotic nuclear division	45	1.8226	0.0218806	ENSG00000124486, ENSG00000105325, ENSG00000130779, ENSG00000097007, ENSG00000197771, ENSG00000135913, ENSG00000072609, ENSG00000153107, ENSG00000118007, ENSG00000137601, ENSG00000121274, ENSG00000173273, ENSG00000037474, ENSG00000166974, ENSG00000175073, ENSG00000144535, ENSG00000175470, ENSG00000094880, ENSG00000120253, ENSG00000185515, ENSG00000147601, ENSG00000103275, ENSG00000113812, ENSG0000…	2203	248	16792	1.38308	1	0.538256	33.9902
GOTERM_BP_DIRECT	GO:0042752~regulation of circadian rhythm	13	0.526529	0.0219371	ENSG00000179222, ENSG00000114062, ENSG00000118260, ENSG00000107643, ENSG00000141551, ENSG00000158941, ENSG00000116560, ENSG00000140464, ENSG00000121390, ENSG00000147140, ENSG00000132356, ENSG00000008405, ENSG00000213923	2203	49	16792	2.02225	1	0.536366	34.0617
GOTERM_BP_DIRECT	GO:0061512~protein localization to cilium	7	0.283516	0.0230487	ENSG00000141551, ENSG00000187535, ENSG00000118965, ENSG00000146350, ENSG00000123607, ENSG00000130338, ENSG00000174483	2203	18	16792	2.96424	1	0.551459	35.4547
GOTERM_BP_DIRECT	GO:0006367~transcription initiation from RNA polymerase II promoter	30	1.21507	0.0233198	ENSG00000122728, ENSG00000180182, ENSG00000111358, ENSG00000054118, ENSG00000147133, ENSG00000163161, ENSG00000196782, ENSG00000112282, ENSG00000112592, ENSG00000042429, ENSG00000130726, ENSG00000105085, ENSG00000108510, ENSG00000064313, ENSG00000161021, ENSG00000184634, ENSG00000144231, ENSG00000165417, ENSG00000177463, ENSG00000115216, ENSG00000005339, ENSG00000124459, ENSG00000125651, ENSG0000…	2203	152	16792	1.50441	1	0.552916	35.7901
GOTERM_BP_DIRECT	GO:0032007~negative regulation of TOR signaling	9	0.36452	0.0237796	ENSG00000217128, ENSG00000165699, ENSG00000159459, ENSG00000103197, ENSG00000089022, ENSG00000024048, ENSG00000132356, ENSG00000096717, ENSG00000100644	2203	28	16792	2.45004	1	0.557253	36.3553
GOTERM_BP_DIRECT	GO:0010506~regulation of autophagy	13	0.526529	0.0255259	ENSG00000143322, ENSG00000058056, ENSG00000094631, ENSG00000097007, ENSG00000214338, ENSG00000149311, ENSG00000083290, ENSG00000186868, ENSG00000102043, ENSG00000116954, ENSG00000196730, ENSG00000103194, ENSG00000077254	2203	50	16792	1.98181	1	0.580498	38.4591
GOTERM_BP_DIRECT	GO:0045859~regulation of protein kinase activity	10	0.405022	0.0276076	ENSG00000185104, ENSG00000167447, ENSG00000134014, ENSG00000165699, ENSG00000070061, ENSG00000198793, ENSG00000111725, ENSG00000131791, ENSG00000089154, ENSG00000134313	2203	34	16792	2.24186	1	0.606788	40.8811
GOTERM_BP_DIRECT	GO:0032784~regulation of DNA-templated transcription, elongation	6	0.243013	0.0277921	ENSG00000225830, ENSG00000198728, ENSG00000158941, ENSG00000196235, ENSG00000176896, ENSG00000163166	2203	14	16792	3.26671	1	0.606497	41.0913
GOTERM_BP_DIRECT	GO:0006283~transcription-coupled nucleotide-excision repair	17	0.688538	0.0284802	ENSG00000225830, ENSG00000111358, ENSG00000139842, ENSG00000144231, ENSG00000163161, ENSG00000005156, ENSG00000175595, ENSG00000167986, ENSG00000144524, ENSG00000047315, ENSG00000035928, ENSG00000187555, ENSG00000076924, ENSG00000021776, ENSG00000134899, ENSG00000158290, ENSG00000198783	2203	74	16792	1.75108	1	0.612857	41.8692
GOTERM_BP_DIRECT	GO:0035264~multicellular organism growth	18	0.72904	0.028597	ENSG00000083093, ENSG00000225830, ENSG00000056586, ENSG00000148339, ENSG00000115159, ENSG00000113448, ENSG00000196182, ENSG00000085224, ENSG00000177565, ENSG00000147050, ENSG00000087274, ENSG00000204120, ENSG00000133958, ENSG00000198793, ENSG00000115904, ENSG00000162769, ENSG00000114742, ENSG00000107854	2203	80	16792	1.71502	1	0.611652	42.0004
GOTERM_BP_DIRECT	GO:0008156~negative regulation of DNA replication	7	0.283516	0.0300423	ENSG00000121892, ENSG00000125482, ENSG00000062650, ENSG00000107937, ENSG00000147601, ENSG00000152942, ENSG00000136273	2203	19	16792	2.80823	1	0.627336	43.5992
GOTERM_BP_DIRECT	GO:0045184~establishment of protein localization	11	0.445525	0.030456	ENSG00000172273, ENSG00000182149, ENSG00000165280, ENSG00000097007, ENSG00000108424, ENSG00000135679, ENSG00000102383, ENSG00000179915, ENSG00000136986, ENSG00000143951, ENSG00000110880	2203	40	16792	2.09614	1	0.629751	44.0492
GOTERM_BP_DIRECT	GO:1904380~endoplasmic reticulum mannose trimming	5	0.202511	0.0321763	ENSG00000071537, ENSG00000135506, ENSG00000134109, ENSG00000136731, ENSG00000116406	2203	10	16792	3.81117	1	0.64761	45.884
GOTERM_BP_DIRECT	GO:0031113~regulation of microtubule polymerization	4	0.162009	0.0331111	ENSG00000097007, ENSG00000163539, ENSG00000109171, ENSG00000186868	2203	6	16792	5.08156	1	0.655654	46.8569
GOTERM_BP_DIRECT	GO:0042797~tRNA transcription from RNA polymerase III promoter	4	0.162009	0.0331111	ENSG00000077235, ENSG00000148308, ENSG00000125484, ENSG00000115207	2203	6	16792	5.08156	1	0.655654	46.8569
GOTERM_BP_DIRECT	GO:0048194~Golgi vesicle budding	4	0.162009	0.0331111	ENSG00000196535, ENSG00000113384, ENSG00000163558, ENSG00000132932	2203	6	16792	5.08156	1	0.655654	46.8569
GOTERM_BP_DIRECT	GO:0042791~5S class rRNA transcription from RNA polymerase III type 1 promoter	4	0.162009	0.0331111	ENSG00000077235, ENSG00000148308, ENSG00000125484, ENSG00000115207	2203	6	16792	5.08156	1	0.655654	46.8569
GOTERM_BP_DIRECT	GO:0007185~transmembrane receptor protein tyrosine phosphatase signaling pathway	4	0.162009	0.0331111	ENSG00000153707, ENSG00000166225, ENSG00000038382, ENSG00000142949	2203	6	16792	5.08156	1	0.655654	46.8569
GOTERM_BP_DIRECT	GO:0010216~maintenance of DNA methylation	4	0.162009	0.0331111	ENSG00000102974, ENSG00000130816, ENSG00000147854, ENSG00000187555	2203	6	16792	5.08156	1	0.655654	46.8569
GOTERM_BP_DIRECT	GO:0034773~histone H4-K20 trimethylation	4	0.162009	0.0331111	ENSG00000032219, ENSG00000178409, ENSG00000110066, ENSG00000054267	2203	6	16792	5.08156	1	0.655654	46.8569
GOTERM_BP_DIRECT	GO:0051438~regulation of ubiquitin-protein transferase activity	4	0.162009	0.0331111	ENSG00000166170, ENSG00000162378, ENSG00000169018, ENSG00000141965	2203	6	16792	5.08156	1	0.655654	46.8569
GOTERM_BP_DIRECT	GO:0006611~protein export from nucleus	9	0.36452	0.0353508	ENSG00000082701, ENSG00000124571, ENSG00000126883, ENSG00000132953, ENSG00000169180, ENSG00000198742, ENSG00000160710, ENSG00000047410, ENSG00000130227	2203	30	16792	2.2867	1	0.677417	49.1212
GOTERM_BP_DIRECT	GO:0000278~mitotic cell cycle	11	0.445525	0.0357045	ENSG00000175470, ENSG00000096401, ENSG00000114904, ENSG00000116273, ENSG00000180370, ENSG00000036257, ENSG00000165660, ENSG00000119772, ENSG00000133895, ENSG00000101349, ENSG00000151422	2203	41	16792	2.04502	1	0.67852	49.4703
GOTERM_BP_DIRECT	GO:0007265~Ras protein signal transduction	16	0.648036	0.0357079	ENSG00000131845, ENSG00000078369, ENSG00000143379, ENSG00000133703, ENSG00000108061, ENSG00000089022, ENSG00000177885, ENSG00000196712, ENSG00000099942, ENSG00000130816, ENSG00000130726, ENSG00000089234, ENSG00000115904, ENSG00000141068, ENSG00000112062, ENSG00000160271	2203	70	16792	1.74225	1	0.675976	49.4737
GOTERM_BP_DIRECT	GO:0016236~macroautophagy	17	0.688538	0.0357123	ENSG00000149547, ENSG00000135018, ENSG00000078142, ENSG00000173726, ENSG00000165861, ENSG00000154174, ENSG00000126775, ENSG00000094631, ENSG00000188554, ENSG00000110497, ENSG00000141564, ENSG00000198793, ENSG00000100330, ENSG00000111725, ENSG00000131791, ENSG00000116954, ENSG00000132356	2203	76	16792	1.705	1	0.673458	49.478
GOTERM_BP_DIRECT	GO:0060976~coronary vasculature development	8	0.324018	0.0372985	ENSG00000198081, ENSG00000166847, ENSG00000100324, ENSG00000070614, ENSG00000107882, ENSG00000006125, ENSG00000197603, ENSG00000133026	2203	25	16792	2.43915	1	0.687058	51.0156
GOTERM_BP_DIRECT	GO:0051028~mRNA transport	12	0.486027	0.0375973	ENSG00000160294, ENSG00000153207, ENSG00000138095, ENSG00000111224, ENSG00000162231, ENSG00000109111, ENSG00000173273, ENSG00000163950, ENSG00000074356, ENSG00000130227, ENSG00000136937, ENSG00000163166	2203	47	16792	1.94613	1	0.687499	51.3003
GOTERM_BP_DIRECT	GO:0032956~regulation of actin cytoskeleton organization	12	0.486027	0.0375973	ENSG00000176749, ENSG00000097007, ENSG00000163539, ENSG00000162738, ENSG00000115355, ENSG00000198793, ENSG00000075618, ENSG00000150764, ENSG00000164327, ENSG00000160007, ENSG00000167193, ENSG00000145242	2203	47	16792	1.94613	1	0.687499	51.3003
GOTERM_BP_DIRECT	GO:0071375~cellular response to peptide hormone stimulus	7	0.283516	0.0382908	ENSG00000010810, ENSG00000103653, ENSG00000135679, ENSG00000197122, ENSG00000125952, ENSG00000133895, ENSG00000173039	2203	20	16792	2.66782	1	0.691771	51.955
GOTERM_BP_DIRECT	GO:0000723~telomere maintenance	10	0.405022	0.0390243	ENSG00000157106, ENSG00000070366, ENSG00000149311, ENSG00000147601, ENSG00000132604, ENSG00000175595, ENSG00000113522, ENSG00000005007, ENSG00000165392, ENSG00000118655	2203	36	16792	2.11731	1	0.69631	52.6383
GOTERM_BP_DIRECT	GO:0033169~histone H3-K9 demethylation	5	0.202511	0.0454296	ENSG00000197724, ENSG00000120733, ENSG00000004487, ENSG00000172943, ENSG00000171988	2203	11	16792	3.4647	1	0.749066	58.2269
GOTERM_BP_DIRECT	GO:0035195~gene silencing by miRNA	5	0.202511	0.0454296	ENSG00000090905, ENSG00000078687, ENSG00000155508, ENSG00000125107, ENSG00000113300	2203	11	16792	3.4647	1	0.749066	58.2269
GOTERM_BP_DIRECT	GO:0032206~positive regulation of telomere maintenance	5	0.202511	0.0454296	ENSG00000140464, ENSG00000132604, ENSG00000085224, ENSG00000113522, ENSG00000174953	2203	11	16792	3.4647	1	0.749066	58.2269
GOTERM_BP_DIRECT	GO:0070914~UV-damage excision repair	5	0.202511	0.0454296	ENSG00000128908, ENSG00000101442, ENSG00000158290, ENSG00000096717, ENSG00000167986	2203	11	16792	3.4647	1	0.749066	58.2269
GOTERM_BP_DIRECT	GO:0033120~positive regulation of RNA splicing	5	0.202511	0.0454296	ENSG00000107290, ENSG00000063244, ENSG00000178607, ENSG00000109917, ENSG00000086589	2203	11	16792	3.4647	1	0.749066	58.2269
GOTERM_BP_DIRECT	GO:0051168~nuclear export	5	0.202511	0.0454296	ENSG00000041802, ENSG00000114503, ENSG00000136937, ENSG00000172175, ENSG00000164902	2203	11	16792	3.4647	1	0.749066	58.2269
GOTERM_BP_DIRECT	GO:0030488~tRNA methylation	8	0.324018	0.0454549	ENSG00000068438, ENSG00000137760, ENSG00000155275, ENSG00000168806, ENSG00000160193, ENSG00000037474, ENSG00000165055, ENSG00000134077	2203	26	16792	2.34533	1	0.746925	58.2477
GOTERM_BP_DIRECT	GO:0006904~vesicle docking involved in exocytosis	8	0.324018	0.0454549	ENSG00000104142, ENSG00000131558, ENSG00000184178, ENSG00000139719, ENSG00000144036, ENSG00000106636, ENSG00000136631, ENSG00000167461	2203	26	16792	2.34533	1	0.746925	58.2477
GOTERM_BP_DIRECT	GO:0070534~protein K63-linked ubiquitination	10	0.405022	0.0457829	ENSG00000163961, ENSG00000198373, ENSG00000204713, ENSG00000063978, ENSG00000132388, ENSG00000186660, ENSG00000175931, ENSG00000175104, ENSG00000103429, ENSG00000177479	2203	37	16792	2.06009	1	0.747158	58.5162
GOTERM_BP_DIRECT	GO:0048813~dendrite morphogenesis	10	0.405022	0.0457829	ENSG00000010810, ENSG00000142599, ENSG00000110911, ENSG00000147852, ENSG00000100320, ENSG00000073921, ENSG00000118263, ENSG00000162374, ENSG00000077279, ENSG00000134313	2203	37	16792	2.06009	1	0.747158	58.5162
GOTERM_BP_DIRECT	GO:0006364~rRNA processing	38	1.53908	0.0466034	ENSG00000165732, ENSG00000165733, ENSG00000162408, ENSG00000120314, ENSG00000101782, ENSG00000179409, ENSG00000198000, ENSG00000121274, ENSG00000119285, ENSG00000150990, ENSG00000148843, ENSG00000213782, ENSG00000165271, ENSG00000160208, ENSG00000130713, ENSG00000138442, ENSG00000117597, ENSG00000083520, ENSG00000088930, ENSG00000087269, ENSG00000213923, ENSG00000144535, ENSG00000084463, ENSG0000…	2203	214	16792	1.3535	1	0.751163	59.1809
GOTERM_BP_DIRECT	GO:0090234~regulation of kinetochore assembly	3	0.121507	0.0470633	ENSG00000171853, ENSG00000063978, ENSG00000112701	2203	3	16792	7.62233	1	0.752359	59.549
GOTERM_BP_DIRECT	GO:0070966~nuclear-transcribed mRNA catabolic process, no-go decay	3	0.121507	0.0470633	ENSG00000152684, ENSG00000009307, ENSG00000113300	2203	3	16792	7.62233	1	0.752359	59.549
GOTERM_BP_DIRECT	GO:0070562~regulation of vitamin D receptor signaling pathway	3	0.121507	0.0470633	ENSG00000125686, ENSG00000100603, ENSG00000122779	2203	3	16792	7.62233	1	0.752359	59.549
GOTERM_BP_DIRECT	GO:0031627~telomeric loop formation	3	0.121507	0.0470633	ENSG00000147601, ENSG00000132604, ENSG00000118655	2203	3	16792	7.62233	1	0.752359	59.549
GOTERM_BP_DIRECT	GO:0006260~DNA replication	29	1.17456	0.0476299	ENSG00000163781, ENSG00000124535, ENSG00000149136, ENSG00000110713, ENSG00000005007, ENSG00000198000, ENSG00000092201, ENSG00000160294, ENSG00000035928, ENSG00000239306, ENSG00000165392, ENSG00000107815, ENSG00000113456, ENSG00000005156, ENSG00000132740, ENSG00000135945, ENSG00000096717, ENSG00000177302, ENSG00000168802, ENSG00000169375, ENSG00000198646, ENSG00000149311, ENSG00000152942, ENSG0000…	2203	155	16792	1.42611	1	0.754329	59.9981
GOTERM_BP_DIRECT	GO:0000132~establishment of mitotic spindle orientation	7	0.283516	0.047849	ENSG00000136861, ENSG00000147316, ENSG00000116584, ENSG00000007168, ENSG00000163811, ENSG00000137497, ENSG00000167716	2203	21	16792	2.54078	1	0.753704	60.1706
GOTERM_BP_DIRECT	GO:0006325~chromatin organization	11	0.445525	0.0480144	ENSG00000111642, ENSG00000140382, ENSG00000148143, ENSG00000170004, ENSG00000181090, ENSG00000153487, ENSG00000163104, ENSG00000160633, ENSG00000148835, ENSG00000096717, ENSG00000069248	2203	43	16792	1.9499	1	0.75269	60.3003
GOTERM_BP_DIRECT	GO:0032924~activin receptor signaling pathway	6	0.243013	0.0485605	ENSG00000135503, ENSG00000114739, ENSG00000204217, ENSG00000121989, ENSG00000175387, ENSG00000115170	2203	16	16792	2.85837	1	0.754473	60.7257
GOTERM_BP_DIRECT	GO:0030518~intracellular steroid hormone receptor signaling pathway	6	0.243013	0.0485605	ENSG00000180182, ENSG00000108510, ENSG00000125686, ENSG00000184634, ENSG00000054118, ENSG00000042429	2203	16	16792	2.85837	1	0.754473	60.7257
GOTERM_BP_DIRECT	GO:0000462~maturation of SSU-rRNA from tricistronic rRNA transcript (SSU-rRNA, 5.8S rRNA, LSU-rRNA)	9	0.36452	0.0502172	ENSG00000119285, ENSG00000165733, ENSG00000167721, ENSG00000112578, ENSG00000117597, ENSG00000065183, ENSG00000147679, ENSG00000120800, ENSG00000087269	2203	32	16792	2.14378	1	0.764079	61.99
GOTERM_BP_DIRECT	GO:0006493~protein O-linked glycosylation	9	0.36452	0.0502172	ENSG00000143641, ENSG00000185900, ENSG00000147162, ENSG00000168769, ENSG00000187605, ENSG00000173402, ENSG00000182606, ENSG00000163389, ENSG00000141429	2203	32	16792	2.14378	1	0.764079	61.99
GOTERM_BP_DIRECT	GO:0048208~COPII vesicle coating	14	0.567031	0.050244	ENSG00000141551, ENSG00000113615, ENSG00000138802, ENSG00000206560, ENSG00000150961, ENSG00000148396, ENSG00000036257, ENSG00000167632, ENSG00000110075, ENSG00000074695, ENSG00000107651, ENSG00000117153, ENSG00000138674, ENSG00000176986	2203	61	16792	1.74939	1	0.762099	62.0101
GOTERM_BP_DIRECT	GO:0030036~actin cytoskeleton organization	25	1.01256	0.0509773	ENSG00000097007, ENSG00000100014, ENSG00000196588, ENSG00000110880, ENSG00000100592, ENSG00000143322, ENSG00000141298, ENSG00000084112, ENSG00000140992, ENSG00000138594, ENSG00000170873, ENSG00000104880, ENSG00000133703, ENSG00000075340, ENSG00000103647, ENSG00000196712, ENSG00000204138, ENSG00000131504, ENSG00000139132, ENSG00000134278, ENSG00000087274, ENSG00000007168, ENSG00000102302, ENSG0000…	2203	130	16792	1.46583	1	0.765018	62.557
GOTERM_BP_DIRECT	GO:0031123~RNA 3'-end processing	4	0.162009	0.0523783	ENSG00000083223, ENSG00000115421, ENSG00000090060, ENSG00000134744	2203	7	16792	4.35562	1	0.772325	63.5814
GOTERM_BP_DIRECT	GO:0006047~UDP-N-acetylglucosamine metabolic process	4	0.162009	0.0523783	ENSG00000159921, ENSG00000198380, ENSG00000117620, ENSG00000117143	2203	7	16792	4.35562	1	0.772325	63.5814
GOTERM_BP_DIRECT	GO:0035280~miRNA loading onto RISC involved in gene silencing by miRNA	4	0.162009	0.0523783	ENSG00000100697, ENSG00000123908, ENSG00000134698, ENSG00000160710	2203	7	16792	4.35562	1	0.772325	63.5814
GOTERM_BP_DIRECT	GO:0035194~posttranscriptional gene silencing by RNA	4	0.162009	0.0523783	ENSG00000090905, ENSG00000123908, ENSG00000078687, ENSG00000134698	2203	7	16792	4.35562	1	0.772325	63.5814
GOTERM_BP_DIRECT	GO:0019054~modulation by virus of host process	4	0.162009	0.0523783	ENSG00000108424, ENSG00000186432, ENSG00000114030, ENSG00000102753	2203	7	16792	4.35562	1	0.772325	63.5814
GOTERM_BP_DIRECT	GO:1901838~positive regulation of transcription of nuclear large rRNA transcript from RNA polymerase I promoter	4	0.162009	0.0523783	ENSG00000115053, ENSG00000127616, ENSG00000099956, ENSG00000198793	2203	7	16792	4.35562	1	0.772325	63.5814
GOTERM_BP_DIRECT	GO:0033683~nucleotide-excision repair, DNA incision	10	0.405022	0.0532773	ENSG00000111358, ENSG00000139842, ENSG00000143799, ENSG00000198690, ENSG00000035928, ENSG00000163161, ENSG00000175595, ENSG00000134899, ENSG00000158290, ENSG00000167986	2203	38	16792	2.00588	1	0.776107	64.2245
GOTERM_BP_DIRECT	GO:0016579~protein deubiquitination	20	0.810045	0.0550454	ENSG00000170185, ENSG00000124486, ENSG00000115464, ENSG00000100221, ENSG00000135913, ENSG00000106346, ENSG00000114316, ENSG00000164663, ENSG00000135093, ENSG00000143258, ENSG00000172046, ENSG00000058056, ENSG00000140153, ENSG00000187555, ENSG00000090686, ENSG00000162402, ENSG00000124422, ENSG00000103194, ENSG00000077254, ENSG00000114742	2203	99	16792	1.53987	1	0.785218	65.4584
GOTERM_BP_DIRECT	GO:0006977~DNA damage response, signal transduction by p53 class mediator resulting in cell cycle arrest	14	0.567031	0.0562496	ENSG00000135679, ENSG00000142453, ENSG00000155508, ENSG00000080802, ENSG00000138767, ENSG00000113300, ENSG00000144580, ENSG00000106144, ENSG00000140464, ENSG00000149311, ENSG00000088038, ENSG00000103479, ENSG00000125107, ENSG00000111596	2203	62	16792	1.72117	1	0.79052	66.2755
GOTERM_BP_DIRECT	GO:0007173~epidermal growth factor receptor signaling pathway	13	0.526529	0.0564043	ENSG00000103653, ENSG00000097007, ENSG00000133703, ENSG00000197122, ENSG00000077044, ENSG00000177885, ENSG00000121879, ENSG00000071051, ENSG00000140992, ENSG00000124181, ENSG00000115904, ENSG00000151694, ENSG00000110395	2203	56	16792	1.76947	1	0.789442	66.3791
GOTERM_BP_DIRECT	GO:0048015~phosphatidylinositol-mediated signaling	21	0.850547	0.0581224	ENSG00000133056, ENSG00000147162, ENSG00000078142, ENSG00000169047, ENSG00000090905, ENSG00000123908, ENSG00000171608, ENSG00000134698, ENSG00000143393, ENSG00000164327, ENSG00000177885, ENSG00000171862, ENSG00000121879, ENSG00000010810, ENSG00000166225, ENSG00000140992, ENSG00000142208, ENSG00000078687, ENSG00000198793, ENSG00000140443, ENSG00000108443	2203	106	16792	1.51008	1	0.79753	67.5101
GOTERM_BP_DIRECT	GO:0031334~positive regulation of protein complex assembly	7	0.283516	0.0587513	ENSG00000185104, ENSG00000082701, ENSG00000165280, ENSG00000217128, ENSG00000052795, ENSG00000164151, ENSG00000119906	2203	22	16792	2.42529	1	0.799161	67.915
GOTERM_BP_DIRECT	GO:0032435~negative regulation of proteasomal ubiquitin-dependent protein catabolic process	7	0.283516	0.0587513	ENSG00000146872, ENSG00000166170, ENSG00000158941, ENSG00000102921, ENSG00000204463, ENSG00000079387, ENSG00000038532	2203	22	16792	2.42529	1	0.799161	67.915
GOTERM_BP_DIRECT	GO:0000717~nucleotide-excision repair, DNA duplex unwinding	7	0.283516	0.0587513	ENSG00000111358, ENSG00000139842, ENSG00000143799, ENSG00000119318, ENSG00000163161, ENSG00000158290, ENSG00000167986	2203	22	16792	2.42529	1	0.799161	67.915
GOTERM_BP_DIRECT	GO:0006361~transcription initiation from RNA polymerase I promoter	9	0.36452	0.0589638	ENSG00000068654, ENSG00000111358, ENSG00000125482, ENSG00000108312, ENSG00000085721, ENSG00000163161, ENSG00000112592, ENSG00000125630, ENSG00000137054	2203	33	16792	2.07882	1	0.798424	68.0507
GOTERM_BP_DIRECT	GO:0035278~miRNA mediated inhibition of translation	5	0.202511	0.061266	ENSG00000173933, ENSG00000090905, ENSG00000123908, ENSG00000078687, ENSG00000134698	2203	12	16792	3.17597	1	0.809141	69.4867
GOTERM_BP_DIRECT	GO:0032211~negative regulation of telomere maintenance via telomerase	5	0.202511	0.061266	ENSG00000153187, ENSG00000135372, ENSG00000140464, ENSG00000147601, ENSG00000197122	2203	12	16792	3.17597	1	0.809141	69.4867
GOTERM_BP_DIRECT	GO:0006379~mRNA cleavage	5	0.202511	0.061266	ENSG00000165494, ENSG00000178607, ENSG00000101811, ENSG00000101138, ENSG00000136709	2203	12	16792	3.17597	1	0.809141	69.4867
GOTERM_BP_DIRECT	GO:0009303~rRNA transcription	5	0.202511	0.061266	ENSG00000185024, ENSG00000077235, ENSG00000125630, ENSG00000106723, ENSG00000137054	2203	12	16792	3.17597	1	0.809141	69.4867
GOTERM_BP_DIRECT	GO:0003279~cardiac septum development	5	0.202511	0.061266	ENSG00000198081, ENSG00000100324, ENSG00000070614, ENSG00000141646, ENSG00000133026	2203	12	16792	3.17597	1	0.809141	69.4867
GOTERM_BP_DIRECT	GO:0035518~histone H2A monoubiquitination	5	0.202511	0.061266	ENSG00000163961, ENSG00000183337, ENSG00000158290, ENSG00000163602, ENSG00000167986	2203	12	16792	3.17597	1	0.809141	69.4867
GOTERM_BP_DIRECT	GO:0007178~transmembrane receptor protein serine/threonine kinase signaling pathway	6	0.243013	0.061612	ENSG00000135503, ENSG00000114739, ENSG00000204217, ENSG00000121989, ENSG00000115170, ENSG00000112062	2203	17	16792	2.69024	1	0.809103	69.6972
GOTERM_BP_DIRECT	GO:0006376~mRNA splice site selection	6	0.243013	0.061612	ENSG00000107290, ENSG00000146963, ENSG00000048740, ENSG00000117569, ENSG00000083896, ENSG00000149187	2203	17	16792	2.69024	1	0.809103	69.6972
GOTERM_BP_DIRECT	GO:0051893~regulation of focal adhesion assembly	6	0.243013	0.061612	ENSG00000198728, ENSG00000165699, ENSG00000074054, ENSG00000127603, ENSG00000143951, ENSG00000110880	2203	17	16792	2.69024	1	0.809103	69.6972
GOTERM_BP_DIRECT	GO:0001702~gastrulation with mouth forming second	6	0.243013	0.061612	ENSG00000198728, ENSG00000166225, ENSG00000114739, ENSG00000121989, ENSG00000115170, ENSG00000141646	2203	17	16792	2.69024	1	0.809103	69.6972
GOTERM_BP_DIRECT	GO:0032481~positive regulation of type I interferon production	12	0.486027	0.0633882	ENSG00000135829, ENSG00000058600, ENSG00000241258, ENSG00000172936, ENSG00000124831, ENSG00000013503, ENSG00000186141, ENSG00000005339, ENSG00000168495, ENSG00000148606, ENSG00000174953, ENSG00000173039	2203	51	16792	1.79349	1	0.816461	70.7561
GOTERM_BP_DIRECT	GO:0006914~autophagy	25	1.01256	0.0635628	ENSG00000104142, ENSG00000166887, ENSG00000152223, ENSG00000115145, ENSG00000179331, ENSG00000078142, ENSG00000097007, ENSG00000151532, ENSG00000138942, ENSG00000189298, ENSG00000009844, ENSG00000113273, ENSG00000058056, ENSG00000165280, ENSG00000136738, ENSG00000102710, ENSG00000198382, ENSG00000188021, ENSG00000137942, ENSG00000155975, ENSG00000198793, ENSG00000083290, ENSG00000160803, ENSG0000…	2203	133	16792	1.43277	1	0.81552	70.8584
GOTERM_BP_DIRECT	GO:0000060~protein import into nucleus, translocation	8	0.324018	0.0649668	ENSG00000196497, ENSG00000105576, ENSG00000142208, ENSG00000108424, ENSG00000083312, ENSG00000086589, ENSG00000137040, ENSG00000065150	2203	28	16792	2.17781	1	0.820715	71.6678
GOTERM_BP_DIRECT	GO:0007050~cell cycle arrest	26	1.05306	0.070247	ENSG00000139842, ENSG00000178252, ENSG00000152409, ENSG00000097007, ENSG00000071246, ENSG00000168826, ENSG00000115241, ENSG00000005483, ENSG00000140464, ENSG00000141564, ENSG00000198793, ENSG00000111725, ENSG00000128829, ENSG00000178607, ENSG00000036257, ENSG00000110321, ENSG00000166266, ENSG00000055130, ENSG00000170515, ENSG00000165699, ENSG00000149311, ENSG00000103197, ENSG00000131791, ENSG0000…	2203	141	16792	1.40554	1	0.843219	74.5256
GOTERM_BP_DIRECT	GO:0018279~protein N-linked glycosylation via asparagine	10	0.405022	0.0705484	ENSG00000073849, ENSG00000168282, ENSG00000118705, ENSG00000165280, ENSG00000184787, ENSG00000134910, ENSG00000244038, ENSG00000074695, ENSG00000157350, ENSG00000136731	2203	40	16792	1.90558	1	0.842835	74.6802
GOTERM_BP_DIRECT	GO:0070536~protein K63-linked deubiquitination	7	0.283516	0.0710127	ENSG00000058056, ENSG00000019995, ENSG00000185515, ENSG00000180667, ENSG00000165312, ENSG00000165660, ENSG00000077254	2203	23	16792	2.31984	1	0.843148	74.9166
GOTERM_BP_DIRECT	GO:0035196~production of miRNAs involved in gene silencing by miRNA	4	0.162009	0.0758186	ENSG00000100697, ENSG00000123908, ENSG00000163877, ENSG00000134698	2203	8	16792	3.81117	1	0.860769	77.2441
GOTERM_BP_DIRECT	GO:0032927~positive regulation of activin receptor signaling pathway	4	0.162009	0.0758186	ENSG00000135503, ENSG00000114739, ENSG00000121989, ENSG00000014164	2203	8	16792	3.81117	1	0.860769	77.2441
GOTERM_BP_DIRECT	GO:0000288~nuclear-transcribed mRNA catabolic process, deadenylation-dependent decay	4	0.162009	0.0758186	ENSG00000144231, ENSG00000088038, ENSG00000135870, ENSG00000111596	2203	8	16792	3.81117	1	0.860769	77.2441
GOTERM_BP_DIRECT	GO:0016574~histone ubiquitination	4	0.162009	0.0758186	ENSG00000178691, ENSG00000086758, ENSG00000124422, ENSG00000111752	2203	8	16792	3.81117	1	0.860769	77.2441
GOTERM_BP_DIRECT	GO:0098789~pre-mRNA cleavage required for polyadenylation	4	0.162009	0.0758186	ENSG00000177613, ENSG00000101811, ENSG00000114503, ENSG00000136937	2203	8	16792	3.81117	1	0.860769	77.2441
GOTERM_BP_DIRECT	GO:0033523~histone H2B ubiquitination	4	0.162009	0.0758186	ENSG00000155827, ENSG00000103549, ENSG00000198730, ENSG00000166477	2203	8	16792	3.81117	1	0.860769	77.2441
GOTERM_BP_DIRECT	GO:0016926~protein desumoylation	4	0.162009	0.0758186	ENSG00000132952, ENSG00000079387, ENSG00000112701, ENSG00000119231	2203	8	16792	3.81117	1	0.860769	77.2441
GOTERM_BP_DIRECT	GO:0034214~protein hexamerization	4	0.162009	0.0758186	ENSG00000021574, ENSG00000107815, ENSG00000165280, ENSG00000110218	2203	8	16792	3.81117	1	0.860769	77.2441
GOTERM_BP_DIRECT	GO:0070544~histone H3-K36 demethylation	4	0.162009	0.0758186	ENSG00000066135, ENSG00000127663, ENSG00000173120, ENSG00000172943	2203	8	16792	3.81117	1	0.860769	77.2441
GOTERM_BP_DIRECT	GO:0050434~positive regulation of viral transcription	8	0.324018	0.076356	ENSG00000048649, ENSG00000060069, ENSG00000047315, ENSG00000101158, ENSG00000144231, ENSG00000129315, ENSG00000196235, ENSG00000125651	2203	29	16792	2.10271	1	0.861231	77.4912
GOTERM_BP_DIRECT	GO:0006294~nucleotide-excision repair, preincision complex assembly	8	0.324018	0.076356	ENSG00000111358, ENSG00000139842, ENSG00000143799, ENSG00000119318, ENSG00000163161, ENSG00000134899, ENSG00000158290, ENSG00000167986	2203	29	16792	2.10271	1	0.861231	77.4912
GOTERM_BP_DIRECT	GO:0035904~aorta development	6	0.243013	0.0764441	ENSG00000166847, ENSG00000100324, ENSG00000070614, ENSG00000107882, ENSG00000006125, ENSG00000133026	2203	18	16792	2.54078	1	0.860013	77.5315
GOTERM_BP_DIRECT	GO:0071539~protein localization to centrosome	6	0.243013	0.0764441	ENSG00000141551, ENSG00000147316, ENSG00000168172, ENSG00000168014, ENSG00000078674, ENSG00000198920	2203	18	16792	2.54078	1	0.860013	77.5315
GOTERM_BP_DIRECT	GO:0007004~telomere maintenance via telomerase	6	0.243013	0.0764441	ENSG00000116698, ENSG00000035928, ENSG00000149311, ENSG00000147601, ENSG00000132604, ENSG00000113522	2203	18	16792	2.54078	1	0.860013	77.5315
GOTERM_BP_DIRECT	GO:0030307~positive regulation of cell growth	17	0.688538	0.0779738	ENSG00000128908, ENSG00000215301, ENSG00000170242, ENSG00000119401, ENSG00000168564, ENSG00000110321, ENSG00000198000, ENSG00000167674, ENSG00000142208, ENSG00000012232, ENSG00000101266, ENSG00000130713, ENSG00000141564, ENSG00000151694, ENSG00000101544, ENSG00000136937, ENSG00000137845	2203	84	16792	1.54262	1	0.86412	78.22
GOTERM_BP_DIRECT	GO:0048872~homeostasis of number of cells	5	0.202511	0.0796153	ENSG00000130396, ENSG00000075856, ENSG00000085721, ENSG00000114742, ENSG00000170558	2203	13	16792	2.93167	1	0.868462	78.9366
GOTERM_BP_DIRECT	GO:0060996~dendritic spine development	5	0.202511	0.0796153	ENSG00000071051, ENSG00000049618, ENSG00000180370, ENSG00000033178, ENSG00000154928	2203	13	16792	2.93167	1	0.868462	78.9366
GOTERM_BP_DIRECT	GO:0051457~maintenance of protein location in nucleus	5	0.202511	0.0796153	ENSG00000148337, ENSG00000197579, ENSG00000165632, ENSG00000140464, ENSG00000159256	2203	13	16792	2.93167	1	0.868462	78.9366
GOTERM_BP_DIRECT	GO:0001829~trophectodermal cell differentiation	5	0.202511	0.0796153	ENSG00000112658, ENSG00000198730, ENSG00000088038, ENSG00000112578, ENSG00000111596	2203	13	16792	2.93167	1	0.868462	78.9366
GOTERM_BP_DIRECT	GO:0033962~cytoplasmic mRNA processing body assembly	5	0.202511	0.0796153	ENSG00000110367, ENSG00000166889, ENSG00000135870, ENSG00000197102, ENSG00000179151	2203	13	16792	2.93167	1	0.868462	78.9366
GOTERM_BP_DIRECT	GO:0030516~regulation of axon extension	5	0.202511	0.0796153	ENSG00000114999, ENSG00000097007, ENSG00000163539, ENSG00000092964, ENSG00000134987	2203	13	16792	2.93167	1	0.868462	78.9366
GOTERM_BP_DIRECT	GO:0034453~microtubule anchoring	5	0.202511	0.0796153	ENSG00000135837, ENSG00000163539, ENSG00000074054, ENSG00000173402, ENSG00000078674	2203	13	16792	2.93167	1	0.868462	78.9366
GOTERM_BP_DIRECT	GO:0009267~cellular response to starvation	11	0.445525	0.0804351	ENSG00000133056, ENSG00000217128, ENSG00000204217, ENSG00000204371, ENSG00000165861, ENSG00000198911, ENSG00000126775, ENSG00000125952, ENSG00000077254, ENSG00000096717, ENSG00000165392	2203	47	16792	1.78395	1	0.869831	79.2861
GOTERM_BP_DIRECT	GO:0000086~G2/M transition of mitotic cell cycle	25	1.01256	0.0835098	ENSG00000116127, ENSG00000138107, ENSG00000072803, ENSG00000148019, ENSG00000005249, ENSG00000078674, ENSG00000213923, ENSG00000106477, ENSG00000064313, ENSG00000074054, ENSG00000147601, ENSG00000149474, ENSG00000141551, ENSG00000136861, ENSG00000007168, ENSG00000101004, ENSG00000131023, ENSG00000055130, ENSG00000127914, ENSG00000175216, ENSG00000058272, ENSG00000197102, ENSG00000121774, ENSG0000…	2203	137	16792	1.39094	1	0.878605	80.5485
GOTERM_BP_DIRECT	GO:0071108~protein K48-linked deubiquitination	7	0.283516	0.0846284	ENSG00000115464, ENSG00000180667, ENSG00000135913, ENSG00000175073, ENSG00000164164, ENSG00000077254, ENSG00000172046	2203	24	16792	2.22318	1	0.880752	80.9894
GOTERM_BP_DIRECT	GO:0048675~axon extension	7	0.283516	0.0846284	ENSG00000124486, ENSG00000104133, ENSG00000083290, ENSG00000077279, ENSG00000186868, ENSG00000173166, ENSG00000131711	2203	24	16792	2.22318	1	0.880752	80.9894
GOTERM_BP_DIRECT	GO:0046907~intracellular transport	7	0.283516	0.0846284	ENSG00000119844, ENSG00000134278, ENSG00000031823, ENSG00000093000, ENSG00000062725, ENSG00000119396, ENSG00000215717	2203	24	16792	2.22318	1	0.880752	80.9894
GOTERM_BP_DIRECT	GO:0090400~stress-induced premature senescence	3	0.121507	0.0860023	ENSG00000089022, ENSG00000112062, ENSG00000096717	2203	4	16792	5.71675	1	0.883623	81.518
GOTERM_BP_DIRECT	GO:0017145~stem cell division	3	0.121507	0.0860023	ENSG00000007168, ENSG00000036257, ENSG00000151923	2203	4	16792	5.71675	1	0.883623	81.518
GOTERM_BP_DIRECT	GO:0032210~regulation of telomere maintenance via telomerase	3	0.121507	0.0860023	ENSG00000070366, ENSG00000173273, ENSG00000132604	2203	4	16792	5.71675	1	0.883623	81.518
GOTERM_BP_DIRECT	GO:0010998~regulation of translational initiation by eIF2 alpha phosphorylation	3	0.121507	0.0860023	ENSG00000128829, ENSG00000172071, ENSG00000086232	2203	4	16792	5.71675	1	0.883623	81.518
GOTERM_BP_DIRECT	GO:2000653~regulation of genetic imprinting	3	0.121507	0.0860023	ENSG00000198730, ENSG00000130726, ENSG00000121879	2203	4	16792	5.71675	1	0.883623	81.518
GOTERM_BP_DIRECT	GO:2000623~negative regulation of nuclear-transcribed mRNA catabolic process, nonsense-mediated decay	3	0.121507	0.0860023	ENSG00000151779, ENSG00000134815, ENSG00000187742	2203	4	16792	5.71675	1	0.883623	81.518
GOTERM_BP_DIRECT	GO:0070213~protein auto-ADP-ribosylation	3	0.121507	0.0860023	ENSG00000173273, ENSG00000138617, ENSG00000107854	2203	4	16792	5.71675	1	0.883623	81.518
GOTERM_BP_DIRECT	GO:0038028~insulin receptor signaling pathway via phosphatidylinositol 3-kinase	3	0.121507	0.0860023	ENSG00000111731, ENSG00000121879, ENSG00000151422	2203	4	16792	5.71675	1	0.883623	81.518
GOTERM_BP_DIRECT	GO:0007000~nucleolus organization	3	0.121507	0.0860023	ENSG00000166197, ENSG00000100029, ENSG00000085721	2203	4	16792	5.71675	1	0.883623	81.518
GOTERM_BP_DIRECT	GO:2001168~positive regulation of histone H2B ubiquitination	3	0.121507	0.0860023	ENSG00000155827, ENSG00000103549, ENSG00000198730	2203	4	16792	5.71675	1	0.883623	81.518
GOTERM_BP_DIRECT	GO:0000466~maturation of 5.8S rRNA from tricistronic rRNA transcript (SSU-rRNA, 5.8S rRNA, LSU-rRNA)	3	0.121507	0.0860023	ENSG00000100029, ENSG00000108592, ENSG00000138442	2203	4	16792	5.71675	1	0.883623	81.518
GOTERM_BP_DIRECT	GO:0090630~activation of GTPase activity	16	0.648036	0.0877814	ENSG00000198863, ENSG00000167291, ENSG00000111490, ENSG00000145348, ENSG00000132405, ENSG00000143398, ENSG00000167202, ENSG00000110880, ENSG00000165699, ENSG00000116641, ENSG00000065491, ENSG00000169221, ENSG00000170471, ENSG00000174373, ENSG00000188559, ENSG00000011454	2203	79	16792	1.54376	1	0.887595	82.1819
GOTERM_BP_DIRECT	GO:0007281~germ cell development	8	0.324018	0.0888358	ENSG00000007168, ENSG00000142208, ENSG00000151923, ENSG00000198793, ENSG00000115170, ENSG00000167716, ENSG00000149187, ENSG00000108443	2203	30	16792	2.03262	1	0.889336	82.5646
GOTERM_BP_DIRECT	GO:0021510~spinal cord development	8	0.324018	0.0888358	ENSG00000184634, ENSG00000142208, ENSG00000117569, ENSG00000109917, ENSG00000198793, ENSG00000092964, ENSG00000185008, ENSG00000196712	2203	30	16792	2.03262	1	0.889336	82.5646
GOTERM_BP_DIRECT	GO:0006362~transcription elongation from RNA polymerase I promoter	8	0.324018	0.0888358	ENSG00000225830, ENSG00000068654, ENSG00000111358, ENSG00000108312, ENSG00000163161, ENSG00000112592, ENSG00000125630, ENSG00000137054	2203	30	16792	2.03262	1	0.889336	82.5646
GOTERM_BP_DIRECT	GO:0042254~ribosome biogenesis	9	0.36452	0.090641	ENSG00000041802, ENSG00000101181, ENSG00000113360, ENSG00000084092, ENSG00000100029, ENSG00000167721, ENSG00000085721, ENSG00000125485, ENSG00000135763	2203	36	16792	1.90558	1	0.893132	83.2019
GOTERM_BP_DIRECT	GO:0090307~mitotic spindle assembly	9	0.36452	0.090641	ENSG00000137822, ENSG00000126216, ENSG00000108424, ENSG00000101966, ENSG00000068796, ENSG00000074054, ENSG00000101350, ENSG00000165660, ENSG00000130640	2203	36	16792	1.90558	1	0.893132	83.2019
GOTERM_BP_DIRECT	GO:0048536~spleen development	9	0.36452	0.090641	ENSG00000008083, ENSG00000056586, ENSG00000162775, ENSG00000097007, ENSG00000168769, ENSG00000118058, ENSG00000135870, ENSG00000151694, ENSG00000162769	2203	36	16792	1.90558	1	0.893132	83.2019
GOTERM_BP_DIRECT	GO:0016477~cell migration	30	1.21507	0.0915843	ENSG00000103653, ENSG00000097007, ENSG00000000457, ENSG00000113384, ENSG00000138443, ENSG00000171862, ENSG00000142949, ENSG00000143322, ENSG00000160293, ENSG00000140992, ENSG00000105778, ENSG00000101349, ENSG00000096968, ENSG00000036257, ENSG00000143398, ENSG00000010810, ENSG00000082701, ENSG00000196535, ENSG00000019995, ENSG00000071051, ENSG00000124181, ENSG00000115355, ENSG00000075618, ENSG0000…	2203	172	16792	1.32948	1	0.894449	83.526
GOTERM_BP_DIRECT	GO:0035335~peptidyl-tyrosine dephosphorylation	19	0.769542	0.0924849	ENSG00000153707, ENSG00000070778, ENSG00000111880, ENSG00000167065, ENSG00000158161, ENSG00000102043, ENSG00000171862, ENSG00000142949, ENSG00000076201, ENSG00000141298, ENSG00000108389, ENSG00000084112, ENSG00000169410, ENSG00000063601, ENSG00000100330, ENSG00000196396, ENSG00000112245, ENSG00000105426, ENSG00000127947	2203	99	16792	1.46287	1	0.895625	83.83
GOTERM_BP_DIRECT	GO:0008589~regulation of smoothened signaling pathway	6	0.243013	0.0930162	ENSG00000187535, ENSG00000123607, ENSG00000106524, ENSG00000168014, ENSG00000005339, ENSG00000103494	2203	19	16792	2.40705	1	0.895799	84.0068
GOTERM_BP_DIRECT	GO:0051298~centrosome duplication	6	0.243013	0.0930162	ENSG00000137822, ENSG00000126216, ENSG00000175216, ENSG00000077254, ENSG00000130640, ENSG00000103540	2203	19	16792	2.40705	1	0.895799	84.0068
GOTERM_BP_DIRECT	GO:0001933~negative regulation of protein phosphorylation	13	0.526529	0.0961252	ENSG00000120948, ENSG00000154710, ENSG00000158615, ENSG00000105298, ENSG00000198793, ENSG00000183853, ENSG00000070018, ENSG00000126775, ENSG00000005700, ENSG00000133895, ENSG00000163291, ENSG00000171862, ENSG00000110880	2203	61	16792	1.62443	1	0.902579	85.0053
GOTERM_BP_DIRECT	GO:0000724~double-strand break repair via homologous recombination	15	0.607533	0.0989668	ENSG00000083093, ENSG00000128908, ENSG00000198690, ENSG00000005156, ENSG00000175595, ENSG00000081177, ENSG00000242802, ENSG00000143799, ENSG00000072121, ENSG00000116560, ENSG00000149311, ENSG00000113522, ENSG00000114742, ENSG00000134452, ENSG00000136273	2203	74	16792	1.54507	1	0.908257	85.8661
GOTERM_BP_DIRECT	GO:0001889~liver development	15	0.607533	0.0989668	ENSG00000133703, ENSG00000197081, ENSG00000151461, ENSG00000182985, ENSG00000121879, ENSG00000196712, ENSG00000153879, ENSG00000173039, ENSG00000008083, ENSG00000125686, ENSG00000197724, ENSG00000025796, ENSG00000100522, ENSG00000103494, ENSG00000165527	2203	74	16792	1.54507	1	0.908257	85.8661
GOTERM_BP_DIRECT	GO:0001578~microtubule bundle formation	7	0.283516	0.0995747	ENSG00000021574, ENSG00000130779, ENSG00000136861, ENSG00000167566, ENSG00000134369, ENSG00000074054, ENSG00000131711	2203	25	16792	2.13425	1	0.908533	86.044
GOTERM_BP_DIRECT	GO:0097352~autophagosome maturation	7	0.283516	0.0995747	ENSG00000135018, ENSG00000165280, ENSG00000152223, ENSG00000198382, ENSG00000215305, ENSG00000139719, ENSG00000151445	2203	25	16792	2.13425	1	0.908533	86.044
GOTERM_BP_DIRECT	GO:0046580~negative regulation of Ras protein signal transduction	7	0.283516	0.0995747	ENSG00000155903, ENSG00000145715, ENSG00000107263, ENSG00000154710, ENSG00000075391, ENSG00000213024, ENSG00000196712	2203	25	16792	2.13425	1	0.908533	86.044
GOTERM_BP_DIRECT	GO:0034198~cellular response to amino acid starvation	7	0.283516	0.0995747	ENSG00000128829, ENSG00000172071, ENSG00000134294, ENSG00000164654, ENSG00000103091, ENSG00000089154, ENSG00000116954	2203	25	16792	2.13425	1	0.908533	86.044
GOTERM_BP_DIRECT	GO:0007569~cell aging	7	0.283516	0.0995747	ENSG00000070444, ENSG00000198793, ENSG00000159256, ENSG00000213024, ENSG00000108175, ENSG00000096717, ENSG00000165392	2203	25	16792	2.13425	1	0.908533	86.044
GOTERM_BP_DIRECT	GO:0034612~response to tumor necrosis factor	7	0.283516	0.0995747	ENSG00000119401, ENSG00000047188, ENSG00000108443, ENSG00000013374, ENSG00000096968, ENSG00000011566, ENSG00000137845	2203	25	16792	2.13425	1	0.908533	86.044
GOTERM_BP_DIRECT	GO:0048589~developmental growth	7	0.283516	0.0995747	ENSG00000112658, ENSG00000107779, ENSG00000164190, ENSG00000141646, ENSG00000108175, ENSG00000163348, ENSG00000171310	2203	25	16792	2.13425	1	0.908533	86.044
GOTERM_BP_DIRECT	GO:0031175~neuron projection development	19	0.769542	0.0996281	ENSG00000176749, ENSG00000112658, ENSG00000118200, ENSG00000104164, ENSG00000103657, ENSG00000188428, ENSG00000066777, ENSG00000162065, ENSG00000196588, ENSG00000143258, ENSG00000149294, ENSG00000167654, ENSG00000130559, ENSG00000111737, ENSG00000130638, ENSG00000130939, ENSG00000116641, ENSG00000158290, ENSG00000196363	2203	100	16792	1.44824	1	0.907523	86.0596
