# Supplementary material for: Identification of CDH11 as an ASD Risk Gene by Matched-gene Co-expression Analysis and Mouse Behavioral Studies
Source: Research Square preprint supplement (doi:10.21203/rs.3.rs-90298/v1), 2020-10-14
Supplement: Supplementary file 2 [file 2a9ba1124894c9a64daf0442.xlsx]

## Sheet: Curve Estimation
mRNA-Abundance Ranking
Dependent Variable	Independent Variable	Equation	Model Summary					Parameter Estimates
			R Square	F	df1	df2	Sig.	Constant	b1	b2	b3
CEC	Orders	Cubic	0.959	125670	3	15938	0	-0.016	5.319e-05	-1.164e-09	-1.027e-13
gDNA-Size Ranking
Dependent Variable	Independent Variable	Equation	Model Summary					Parameter Estimates
			R Square	F	df1	df2	Sig.	Constant	b1	b2	b3
CEC	Orders	Cubic	0.937	78944.2	3	15938	0	0.057	3.011e-05	-9.785e-10	-8.141e-15
mRNA-Size Ranking
Dependent Variable	Independent Variable	Equation	Model Summary					Parameter Estimates
			R Square	F	df1	df2	Sig.	Constant	b1	b2	b3
CEC	Orders	Cubic	0.972	186328	3	15938	0	-0.029	5.573e-05	-3.855e-09	1.152e-13
GC-Content Ranking
Dependent Variable	Independent Variable	Equation	Model Summary					Parameter Estimates
			R Square	F	df1	df2	Sig.	Constant	b1	b2	b3
CEC	Orders	Cubic	0.905	50381.1	3	15938	0	0.274	2.145e-06	-1.645e-09	5.364e-14
